# Supplementary material
Source: publisher figshare collection journal article supplement (https://frontiersin.figshare.com/ndownloader/files/31747991)
Supplement: Supplementary file 1 [file 31747991]

Time	SiteID	IGBP	GPP	SIF	SM	PAR	RH	TA	VPD	SWC	gc	Rn	LAI	LAI_SpacStd	PRI	APAR	APAR_MOD	PAR_MOD	LE_MOD	EF	LE_EC	fPAR	NIR
16/03/2018 12:30	US-Me2	ENF	7.997946165	0.2713	0.168544111	977.5	73.78	0.40867	0.165091559	25.03666667	NaN	434.04	0.431592882	0.071699508	NaN	250.5090428	286.5681485	1118.204605	34.77573892	0.532019153	95.108	0.256275236	0.245407667
18/03/2018 11:30	US-Me2	ENF	9.28795857	-0.2559	0.130970453	1401.1	48.167	1.999	0.36695305	24.95666667	NaN	536.96	0.44950264	0.068365486	-0.046459065	362.5180073	340.5164504	1316.065931	34.95517725	0.148267195	63.472	0.25873814	0.197718333
19/03/2018 13:00	US-Me2	ENF	6.881215583	0.4348	0.144591067	686.8	38.527	4.3987	0.517896609	24.92666667	NaN	257.29	0.459038938	0.069627829	NaN	180.0081167	195.4537912	745.7311719	35.20795825	0.278489913	25.745	0.26209685	0.164015167
27/03/2018 12:30	US-Me2	ENF	8.090317668	0.088	0.154204292	315.6	76.91	4.247	0.192420249	25.24666667	NaN	128.58	0.54484003	0.090026616	NaN	93.10350677	84.862251	287.6639919	38.42518915	0.164545026	8.725	0.295004774	0.5106655
05/04/2018 13:00	US-Me2	ENF	7.603287321	0.6963	NaN	302.8	72.19	7.8813	0.299763369	25.47	164.2977155	111.01	0.658452027	0.108879138	NaN	105.1883846	116.5905428	335.6227637	NaN	1.31375248	64.902	0.347385682	0.741267833
07/04/2018 12:00	US-Me2	ENF	13.13096474	0.424	0.183216938	1285.7	59.797	5.4957	0.366318387	25.70666667	105.2361693	536.78	0.67002551	0.095643481	-0.045621531	455.5264619	417.5369709	1178.476617	NaN	0.467817124	161.57	0.354302296	0.316816
10/04/2018 13:00	US-Me2	ENF	18.17721428	1.3307	0.230700553	1716.9	66.433	7.5823	0.354340995	25.42	243.9275333	676.55	0.688722364	0.075976745	NaN	626.9750893	57.77764404	158.2175093	NaN	NaN	94.693	0.365178571	0.7799625
11/04/2018 12:30	US-Me2	ENF	6.691192487	-0.5661	0.144462191	242.8	60.44	4.4717	0.335034738	NaN	263.1381197	79.407	0.711453019	0.090292129	NaN	90.26647449	78.956299	212.377735	NaN	0.477189605	37.185	0.371772959	0.707967667
12/04/2018 12:30	US-Me2	ENF	11.42809713	0.0679	0.200323928	1562.4	77.923	0.085	0.135702202	25.36333333	275.2221645	671.69	0.734667304	0.104912096	NaN	591.3803571	248.1917553	655.7113266	NaN	0.190769009	87.269	0.378507653	0.431277333
23/04/2018 12:30	US-Me2	ENF	9.737215821	0.7148	0.174161749	1821.6	30.47	9.79	0.85531014	24.74333333	564.9986435	719.67	0.85809949	0.268477972	-0.052651584	755.3753878	724.8191356	1747.913102	32.32210889	0.170345175	58.194	0.414676871	0.191672667
01/05/2018 13:00	US-Me2	ENF	10.62330172	0.3996	0.151707523	554.4	55.867	6.3963	0.428629073	NaN	NaN	218.89	0.935579649	0.376071851	NaN	226.6590268	239.7645124	586.4555565	35.47513985	0.189620922	27.777	0.408836628	0.737996333
12/05/2018 13:00	US-Me2	ENF	13.70944414	0.0794	0.146434976	1766	34.73	15.313	1.163582999	21.10333333	247.582539	687.55	1.000497803	0.468500814	-0.053897565	716.9985654	799.4551976	1969.094427	39.73798922	0.359123987	156.93	0.406001453	0.220626667
14/05/2018 12:30	US-Me2	ENF	11.67726237	0.3613	0.136860812	1917.8	22.28	20.213	1.900145087	NaN	667.8704839	742.54	1.024143459	0.527367024	-0.057192088	786.1982845	756.4989422	1845.353392	42.19731251	0.205954532	95.421	0.409948005	0.240616
18/05/2018 13:00	US-Me2	ENF	15.88026194	0.6135	0.151899014	1893.4	21.947	16.193	1.474004036	20.22	230.5500973	740.63	1.072181477	0.646958376	-0.048768197	791.376329	787.9725734	1885.256376	47.19362194	0.306086624	176.11	0.417965738	0.194603
21/05/2018 12:00	US-Me2	ENF	15.79429025	1.2958	0.127666419	1954.5	33.803	16.8	1.30049338	NaN	225.199633	775.73	1.109357993	0.701634736	-0.008988666	830.6998948	722.364824	1699.605426	49.95941037	NaN	190.95	0.425019133	0.253516
29/05/2018 12:30	US-Me2	ENF	18.43166004	1.0522	0.120043631	1882.7	30.977	14.603	1.174246463	NaN	188.0471783	745.85	1.18914532	0.679691156	NaN	831.4001766	638.7660469	1446.481334	50.16283577	NaN	178.01	0.441599924	0.166288667
02/06/2018 13:00	US-Me2	ENF	15.18271029	0.7346	0.095731807	1888.5	27.443	21.313	1.901131583	NaN	226.5134212	729.95	1.123481966	0.691695983	-0.047017641	793.3635405	855.4017144	2036.173904	41.8006426	NaN	253.81	0.420102484	0.184100667
11/06/2018 12:00	US-Me2	ENF	23.5491812	1.2269	0.222163325	1547.7	51.12	7.022	0.496119554	13.03	110.5839261	647.4	1.091751701	0.717310138	-0.047204208	625.1997321	758.2556254	1877.083708	37.60609568	NaN	186.51	0.403954082	0.208076
15/06/2018 12:30	US-Me2	ENF	11.48769515	1.6753	0.119709967	2115.2	35.92	14.557	1.086844926	11.81333333	NaN	865.06	1.103636976	0.761850636	-0.047580137	853.573769	788.8287752	1954.758553	39.42171157	0.149761701	44.118	0.403542818	0.243258167
16/06/2018 12:00	US-Me2	ENF	19.12849161	1.3693	NaN	1767.7	39.497	14.8	1.042776969	11.61333333	265.3388325	697.75	1.106717687	0.780721686	NaN	713.0850693	280.2827217	694.8059754	39.98521091	NaN	185.05	0.403397109	0.252948
20/06/2018 12:30	US-Me2	ENF	9.313083976	2.15	0.094173446	1973.8	29.36	21.887	1.91857105	10.78	NaN	775.4	1.119368268	0.858213445	-0.050401988	795.0442133	808.0889916	2006.185348	42.29915499	0.338825405	140.25	0.402798771	0.214231083
26/06/2018 12:00	US-Me2	ENF	20.04279181	1.7842	0.090512316	2055.8	32.267	16.153	1.27577956	10.04333333	206.9545012	834.97	1.056972789	0.830692446	-0.04720346	793.2923138	755.3036214	1957.353119	35.81372171	NaN	272.13	0.385880102	0.189216
29/06/2018 13:00	US-Me2	ENF	17.18911304	1.3336	0.057656721	1919.5	35.313	15.753	1.186957532	9.746666667	179.4283531	749.1	1.016863308	0.802364193	-0.038694075	721.0247693	747.4169495	1989.760818	31.51242605	NaN	199.38	0.375631555	0.229474833
01/07/2018 12:30	US-Me2	ENF	11.71210559	1.3235	0.073558498	1958.9	20.793	21.723	2.129326644	9.613333333	380.5797313	761.6	0.977734375	0.778945573	-0.047499997	718.6320499	728.0926996	1984.688533	28.095462	0.345300196	207.85	0.366854893	0.28476375
09/07/2018 13:00	US-Me2	ENF	10.75147927	2.651	0.079774146	1894.8	24.297	24.22	2.375299071	9.060666667	382.3110568	731.87	0.824749504	0.667183818	-0.037721	627.9351356	668.0878076	2015.961054	16.49757668	NaN	201.96	0.331399164	0.184852833
10/07/2018 13:00	US-Me2	ENF	13.44139979	2.1576	NaN	1898	28.43	23.417	2.137418456	9.009666667	238.5822665	729.54	0.807717191	0.64709588	-0.039203118	620.6837932	660.9100037	2021.008444	15.87305893	NaN	244.97	0.327019912	0.238745833
12/07/2018 12:00	US-Me2	ENF	9.632079975	1.0003	0.076362481	1960.6	33.29	19.873	1.596231009	8.899666667	NaN	772.06	0.774362245	0.607757002	-0.037564081	624.3410663	616.8661655	1937.126788	14.65004501	0.268400027	118.92	0.318443878	0.196076
17/03/2019 13:00	US-Me2	ENF	4.57181472	-0.2575	NaN	1514.3	42.023	10.527	0.75010868	25.35666667	NaN	539.9	0.327669537	0.043600634	-0.031405871	303.3505218	245.926048	1227.641912	43.55510612	0.015666645	4.6419	0.200323926	0.216126667
18/03/2019 12:30	US-Me2	ENF	5.376387067	-0.131	NaN	1575	62.43	5.8064	0.349967021	25.59	NaN	576.97	0.323260789	0.043874281	-0.038021097	308.9932617	287.1518011	1463.669739	43.81049095	NaN	-5.621	0.196186198	0.188197333
20/03/2019 12:00	US-Me2	ENF	6.470342032	-0.2693	NaN	1604.7	30.63	10.519	0.897021681	25.84666667	NaN	592.9	0.31434949	0.044427399	-0.008103278	301.3990932	248.1084667	1320.971647	44.32669432	NaN	-6.4037	0.187822704	0.117724
24/03/2019 12:30	US-Me2	ENF	9.219509461	0.5041	0.213341964	1590	31.08	8.9506	0.800155895	26.45	NaN	588.53	0.296245483	0.0455511	-0.017781556	271.6222537	158.2298856	926.2330854	45.37540221	0.210571936	92.316	0.170831606	0.378977167
25/03/2019 12:00	US-Me2	ENF	1.799900107	0.3296	0.25308034	412.6	43.577	6.7077	0.560158273	26.51333333	NaN	132.43	0.291836735	0.045824748	NaN	68.77789388	137.7234224	826.2056437	45.63078704	0.684651545	61.607	0.166693878	0.608392
26/03/2019 12:00	US-Me2	ENF	7.259452129	0.8856	0.181575535	1420.3	41.637	7.4122	0.608803919	26.53	NaN	535.17	0.312946429	0.050432515	NaN	252.3103771	158.1047531	889.9997829	44.62408372	0.252417521	82.929	0.177645833	0.498112
27/03/2019 13:00	US-Me2	ENF	2.624010704	-0.2055	0.239002167	483.77	95.833	2.4141	0.030409219	26.55	NaN	201.53	0.334935693	0.055232273	NaN	91.45871193	35.72279172	188.9553722	43.57543443	0.244392738	18.066	0.189054121	0.885589667
28/03/2019 13:00	US-Me2	ENF	9.148206955	0.1666	0.268618275	884.3	62.07	7.7775	0.405895894	26.67666667	NaN	312.23	0.356045387	0.05984004	NaN	176.8653734	217.1692657	1085.81334	42.56873111	0.283795949	75.343	0.200006076	0.3703285
31/03/2019 12:00	US-Me2	ENF	17.37260864	0.0802	NaN	1697.3	28.863	13.722	1.141535143	26.86333333	NaN	656.6	0.418494898	0.073471352	-0.049069681	394.4620457	275.8006244	1186.721017	39.59056713	0.12573422	53.451	0.232405612	0.155644
04/04/2019 12:30	US-Me2	ENF	9.291012293	0.2651	0.274877248	790.23	69.94	9.6826	0.367058736	27.75	NaN	383.3	NaN	NaN	NaN	NaN	NaN	769.9662137	NaN	0.482806492	92.161	NaN	0.491571417
11/04/2019 12:00	US-Me2	ENF	8.718830554	0.0444	0.257325039	1642	71.773	4.7964	0.244681015	27.54	NaN	706.23	NaN	NaN	NaN	NaN	NaN	823.3919771	NaN	NaN	141.2	NaN	0.380416
09/05/2019 13:00	US-Me2	ENF	10.06023751	0.2249	0.133985288	1846	22.437	20.897	1.97989566	25.83	509.6799389	707.5	0.805738024	0.31996993	-0.044387346	651.5332207	677.2312366	1918.81062	30.01047561	NaN	106.57	0.35294324	0.1943775
11/05/2019 12:30	US-Me2	ENF	13.56583185	-0.7963	0.13182863	1899.3	14.77	26.804	3.128430943	25.545	382.578228	724.7	0.781419182	0.343697497	-0.04612322	648.1936612	661.0048317	1936.838559	28.70604799	NaN	208.99	0.341280293	0.184329417
06/06/2019 13:00	US-Me2	ENF	17.25947341	2.601	0.140528366	1918.7	40.86	10.543	0.76599183	26.075	177.3419117	762.47	1.107897534	0.782058323	NaN	799.7071443	209.0323349	501.5215179	36.90609193	NaN	199.99	0.416796344	0.772419
07/06/2019 12:30	US-Me2	ENF	13.23700943	0.9744	0.124476636	1631.3	63.41	7.4852	0.383637863	25.715	250.0373703	672.53	1.09805591	0.772159513	NaN	674.0684881	400.4750915	969.1819574	35.75548295	NaN	97.375	0.413209396	0.25378425
12/06/2019 12:30	US-Me2	ENF	6.827602643	1.9245	0.092752278	1922.7	30.377	28.311	2.796455387	24.335	412.8966176	739.33	1.047800808	0.721612398	-0.04459601	759.2609052	797.2179997	2018.819931	29.88003285	0.446486988	211.55	0.39489307	0.1856805
17/06/2019 12:30	US-Me2	ENF	11.04604226	1.3638	0.093761909	1984.3	22.287	23.509	2.334081754	22.545	321.0531362	762.27	1.046404301	0.697637097	-0.045130843	793.1788944	790.3556923	1977.23718	38.65094388	0.389306409	221.71	0.399727307	0.182921
22/06/2019 12:30	US-Me2	ENF	12.15669794	0.9316	NaN	1984.3	32.267	19.054	1.538447924	19.895	364.5458312	769.03	1.053069196	0.696069304	-0.048808005	806.76183	782.2375349	1923.98039	47.10926113	0.264067744	135.34	0.406572509	0.196820333
23/06/2019 12:30	US-Me2	ENF	13.91968396	1.627	NaN	1922.7	38.587	16.526	1.185206265	NaN	229.4678785	754.17	1.051411033	0.708179829	-0.043256852	778.913026	812.998654	2006.838325	45.77663511	0.314714383	176.41	0.405114176	0.189455917
28/06/2019 12:30	US-Me2	ENF	11.02771066	1.6018	NaN	1359.7	36.56	16.229	1.200859812	18.33	530.8192179	528.53	1.043120217	0.768732456	-0.049831735	540.9192658	717.1616794	1802.717701	39.11350496	0.312626902	77.755	0.397822509	0.20446675
01/07/2019 13:00	US-Me2	ENF	0.439485576	1.6202	NaN	236.3	75.483	12.398	0.36007654	22.135	467.9224095	78.89	1.000559099	0.781507288	-0.049180328	90.49521422	374.6469869	978.2736443	36.3022039	3.447223664	33.214	0.382967474	0.648302333
06/07/2019 11:30	US-Me2	ENF	15.80667273	1.3607	NaN	1982.7	25.607	19.013	1.68530405	19.455	187.6693979	774.97	0.901557185	0.783723984	-0.036934005	694.9281309	641.7337023	1830.930934	32.65908324	NaN	333.47	0.350495855	0.252192
08/07/2019 12:30	US-Me2	ENF	18.30904807	1.703	NaN	2037.7	36.457	19.612	1.495474	18.69	166.3115709	805.2	0.886105796	0.784050637	-0.03908406	701.7174151	672.5373186	1952.964633	33.26133027	NaN	277.1	0.344367382	0.235219417
10/07/2019 12:00	US-Me2	ENF	13.04557392	1.5365	NaN	1866	41.74	22.069	1.600397301	18.12	492.8965038	741.1	0.895833333	0.783795397	NaN	644.7061735	460.8155499	1333.757689	35.88927469	0.474649271	188.45	0.345501701	0.420528
14/07/2019 12:30	US-Me2	ENF	15.36739927	0.6651	NaN	1993.7	27.81	23.229	2.131058353	16.095	121.4659972	767.33	0.915595592	0.783276856	-0.036169059	693.421137	682.9222442	1963.513954	41.22815126	NaN	382.6	0.347806158	0.19099175
16/07/2019 12:00	US-Me2	ENF	16.34865379	1.9355	NaN	2030.7	38.187	20.925	1.580637535	15.125	341.8154201	812.9	0.889243197	0.745920104	-0.0374801	693.6325536	656.6186965	1922.337093	39.39846965	0.340588854	194.34	0.341573129	0.234352
20/07/2019 12:00	US-Me2	ENF	12.23464102	1.8577	NaN	NaN	31.50196078	19.776	1.628962722	13.1	NaN	NaN	0.764583333	0.596998201	-0.044465434	NaN	602.5941877	1916.670989	26.87917953	0.344522015	210.72	0.314396259	0.242976
22/07/2019 11:30	US-Me2	ENF	9.870867348	1.591	NaN	NaN	43.85428809	26.114	1.976920366	12.34	NaN	NaN	0.702902671	0.523312884	-0.037398885	NaN	539.5761304	1792.913312	20.6847391	0.392763397	194.52	0.300949369	0.349538833
24/07/2019 12:30	US-Me2	ENF	8.993975233	2.3328	0.090435974	1957.7	21.827	21.281	2.04417574	11.62	504.9304317	750.37	0.690402671	0.533002445	-0.040447704	580.1957887	580.809048	1959.769263	18.06898496	0.427697897	167.17	0.296366036	0.208687583
07/02/2018 12:00	US-Me6	ENF	2.689510549	0.0929	0.184915226	952.03	40.553	13.707	0.952993986	21.98	291.4194666	314.37	1.285119048	0.44433725	-0.09014911	617.4837436	554.7081575	855.2432556	NaN	0.362869371	76.65286537	0.648596939	NaN
10/02/2018 12:30	US-Me6	ENF	5.276305712	0.2813	0.186030759	912.67	48.51	2.024	0.365192612	21.58333333	377.2843833	289.93	1.214864123	0.366394129	-0.103169206	582.0029556	662.3045686	1038.595259	NaN	0.147738146	35.87284343	0.637692655	NaN
16/02/2018 12:30	US-Me6	ENF	6.097794855	-0.3671	NaN	424.57	59.857	2.9297	0.304155896	20.89866667	NaN	143.67	0.876271967	0.242386491	NaN	218.9642417	141.2509318	273.8844829	17.1499077	0.071378639	10.0845567	0.51573178	NaN
09/04/2019 12:30	US-Me6	ENF	7.667742615	-0.391	0.276084486	1680.3333	60.93	5.263	0.350145346	24.99553333	462.4566656	626.3333	0.763093688	0.54765069	NaN	642.7941671	198.1181712	517.9022732	NaN	0.322418269	160.4835	0.382539683	0.284965083
11/04/2019 13:30	US-Me6	ENF	6.908277228	0.381	0.230627661	1057	56.22	6.7787	0.436818735	23.56666667	482.5093653	341.8667	0.900560029	0.599935899	NaN	439.6046484	241.1630745	579.8604966	NaN	0.320168275	112.028	0.415898438	0.726614
12/04/2019 13:00	US-Me6	ENF	8.913031105	0.1408	0.237739221	2005.3333	49.9533	8.9133	0.579541413	23.06553333	453.4368085	728.6667	1.004752604	0.582735122	-0.014418999	881.876652	468.8376526	1066.108004	NaN	NaN	182.0539	0.439765625	0.528948167
18/04/2019 13:00	US-Me6	ENF	5.948605263	0.3867	0.278642087	1849.6667	30.24	21.5067	1.850160792	22.00443333	NaN	626.6333	1.64133716	0.479027892	-0.014613518	1082.891577	872.7634419	1490.750792	39.40285681	0.324461988	132.5484	0.585452275	0.2418955
24/04/2019 12:30	US-Me6	ENF	7.678091654	0.4093	NaN	1959.3333	14.62	15.42	1.532823195	21.12333333	NaN	662.2333	2.008933886	0.616978245	-0.075554824	1274.259638	1118.456222	1719.766093	42.10851431	0.27379205	112.3659	0.650353688	0.2376665
28/04/2019 13:00	US-Me6	ENF	6.771399537	0.2535	0.169261948	1940.3333	22.79	8.67	0.879157517	20.33223333	NaN	654.0667	2.151705995	0.659489088	-0.016730038	1308.118001	874.7316813	1297.490752	45.36715535	0.176674397	82.4488	0.674171804	0.354997
29/04/2019 13:00	US-Me6	ENF	7.464369043	-0.003	0.156639283	1736.3333	28.9267	8.0367	0.774441506	20.25556667	NaN	576.7667	2.162037628	0.65794517	-0.005025466	1172.572811	891.1787832	1319.648028	46.52456276	NaN	84.2067	0.675315512	0.231567222
03/05/2019 13:30	US-Me6	ENF	7.236657229	0.2353	0.136110229	1854	18.4767	18.75	1.816060707	19.88446667	NaN	601	2.203579401	0.651737332	-0.070997692	1260.560869	1083.822813	1594.058284	51.17830504	0.231755105	95.0465	0.679914169	0.21907075
04/05/2019 13:00	US-Me6	ENF	7.640890272	0.085	0.195230499	1915	20.3233	19.9767	1.919067526	19.72223333	NaN	623.2333	2.212919855	0.649580133	-0.072243325	1304.034326	1246.153621	1830.001049	52.25573881	0.251310385	124.6018	0.680957873	0.196249333
05/05/2019 12:30	US-Me6	ENF	7.883219337	0.1931	NaN	2025	21.9867	19.6633	1.842022283	19.54776667	NaN	670.6333	2.204801764	0.632900385	-0.07889259	1377.58241	1180.038714	1734.617384	52.07630048	0.232749601	106.0666	0.68028761	0.142679583
08/05/2019 13:30	US-Me6	ENF	5.321992791	-0.0951	0.135449599	1940.6667	28.64	18.86	1.600875268	19.0078	NaN	630.9667	2.179583865	0.581086702	NaN	1316.170862	955.7990337	1409.305897	51.51889628	0.229910924	102.2876	0.678205517	0.59938925
03/06/2019 13:30	US-Me6	ENF	9.786476498	1.4449	NaN	1971.6667	24.57	22.2067	2.089906945	19.55	441.9034534	647.8	2.686054422	0.494639611	-0.077204886	1456.859558	1295.283288	1752.994591	69.47850357	0.46900318	270.6895	0.738897481	0.18156475
04/06/2019 13:30	US-Me6	ENF	8.301734774	0.72	0.172348328	1967	15.54	23.2133	2.490853209	19.01333333	712.6162249	639.0667	2.713265306	0.468670062	-0.080885593	1464.47572	1341.998853	1802.496079	66.67982816	0.346693456	200.0614	0.744522481	0.2325015
06/06/2019 12:30	US-Me6	ENF	13.07587718	0.0676	0.143980138	1990.6667	34.87	11.2867	0.887371801	18.1411	644.7059858	699.9333	2.742160927	0.437698238	NaN	1492.127204	161.3239157	215.2243764	66.29275308	0.261125493	121.5101	0.749561543	0.807905083
08/06/2019 12:00	US-Me6	ENF	10.52439937	0.3839	0.123011628	2136.3333	26.1833	13.09	1.1356319	17.72666667	NaN	721.8	2.74872449	0.424853131	-0.060973795	1600.342535	1233.556366	1646.702181	70.62917953	0.234029312	115.375	0.749107143	0.500396
09/06/2019 13:30	US-Me6	ENF	7.684202029	1.1279	0.127627329	1734.3333	11.87	22.3233	2.459564221	17.37333333	NaN	551.5667	2.752248087	0.417957337	-0.05632291	1298.778388	1395.422201	1863.387329	72.95715583	0.352441418	116.1544	0.748863202	0.24077675
11/06/2019 12:30	US-Me6	ENF	7.716703317	0.862	NaN	2098.3333	25.63	24.85	2.425141971	16.4578	NaN	689.6333	2.75874256	0.405247441	-0.082952151	1570.421146	1464.12683	1956.307129	77.24793569	0.375657858	162.373	0.748413584	0.235438417
12/06/2019 12:30	US-Me6	ENF	6.826993997	0.1018	0.129428804	2153.3333	27.2133	28.2667	2.915838844	15.94996667	NaN	715.1333	2.762058886	0.398757282	-0.048541912	1611.089505	1404.821418	1877.641639	79.43897221	0.422691244	242.9885	0.748183992	0.211413292
17/06/2019 12:30	US-Me6	ENF	8.151891157	-0.0338	0.102220964	2099.6667	23.9833	24.1667	2.377358934	13.95223333	NaN	686.7333	2.670700291	0.403134295	-0.079906159	1546.846344	1426.072637	1935.730228	76.49109975	0.371479675	170.3887	0.736710424	0.170201583
20/06/2019 13:00	US-Me6	ENF	15.64967799	1.0602	NaN	1956	47.9367	11.21	0.705659644	13.0711	474.0396768	646	2.59962337	0.411197168	NaN	1424.475157	719.8974101	988.5180005	72.66455547	NaN	132.8432	0.728259283	0.312721167
26/06/2019 13:00	US-Me6	ENF	8.320194244	0.377	NaN	1102.8	43.4233	15.8433	1.044294036	11.89676667	364.6582521	371.7333	2.253010558	0.551473092	NaN	740.459673	132.0686289	196.6957678	67.5118152	0.673043369	212.0409	0.671436047	0.858464708
27/06/2019 12:30	US-Me6	ENF	11.30553907	0.3643	NaN	2243.3333	41.5	14.06	0.960073777	11.8429	388.7821024	790.8333	2.190072456	0.578219985	-0.041143358	1482.665706	1167.649084	1766.700384	66.74684124	0.387129587	233.6022	0.66092083	0.368996167
30/06/2019 11:30	US-Me6	ENF	8.175736182	1.0694	NaN	2112	38.66	19.0533	1.393178819	11.84776667	NaN	733.8333	2.151864725	0.644834335	-0.022753989	1375.071014	1114.775278	1712.206398	67.21221547	0.437743301	160.2847	0.651075291	0.247111417
02/07/2019 12:30	US-Me6	ENF	11.17689958	-0.4105	NaN	2094	43.5633	16.2467	1.069528036	12.10666667	555.7123802	725.5333	2.337455003	0.671005506	-0.024546639	1413.164138	1244.762233	1844.465231	71.40661169	0.383065243	202.3369	0.674863485	0.359995611
04/07/2019 12:00	US-Me6	ENF	9.199381873	0.4232	NaN	2064.3333	22.85	22.8733	2.227912165	12.16333333	NaN	679.9	2.517363946	0.696375519	-0.081194218	1440.746659	1316.735923	1886.648008	75.47260802	0.372808031	193.1694	0.697923469	0.26776
07/07/2019 13:00	US-Me6	ENF	10.9646338	1.2333	NaN	2065.6667	31.1033	19.66	1.626423496	11.81776667	NaN	679.3667	2.789602466	0.73329542	NaN	1513.98812	753.0563341	1027.460766	81.6304441	0.260742767	140.1368	0.732929528	0.246689667
19/07/2019 12:30	US-Me6	ENF	10.62066764	0.8602	NaN	2082	28.0967	19.08	1.635880973	9.816466667	NaN	680.3333	2.673498618	0.431706835	-0.07788808	1539.759203	1431.730828	1935.928408	77.03266327	0.246313789	126.6011	0.739557735	0.170888083
20/07/2019 12:00	US-Me6	ENF	8.556520787	0.3406	NaN	2087	23.5267	20.6767	1.925194868	9.683	NaN	684.4333	2.666879252	0.429692785	-0.074807514	1541.780123	1405.393082	1902.382394	76.16222994	0.248376618	131.702	0.738754252	0.259816
21/07/2019 13:30	US-Me6	ENF	5.342457201	1.2766	NaN	1939	18.43	27.15	3.056933509	9.562766667	NaN	613.5333	2.659696535	0.427507327	-0.077782827	1430.753949	1354.54103	1835.714002	75.21771717	0.267194505	120.6726	0.737882387	0.18317375
23/07/2019 13:00	US-Me6	ENF	6.426471915	0.8032	NaN	1313.3333	31.66	26.7633	2.502339962	9.277666667	NaN	400.9667	2.646876772	0.424030906	-0.08053423	967.0814723	1486.329079	2018.491234	73.5005278	0.306893477	144.5073	0.73635647	0.231238833
25/07/2019 12:00	US-Me6	ENF	5.555357614	0.1359	0.076156519	2062.6667	16.0433	25.42	2.834431967	8.995333333	NaN	663.0333	2.65994898	0.447945692	-0.086050894	1525.057882	1406.025375	1901.673212	73.74292695	0.238357442	62.4174	0.739362245	0.263336
27/07/2019 13:00	US-Me6	ENF	7.361902183	0.9063	0.084029399	2001.6667	32.7067	24.2633	2.117043381	8.7378	NaN	646.7667	2.673577452	0.472878128	-0.08535707	1486.229369	1488.14612	2004.248198	73.99564097	NaN	160.2543	0.742495925	0.257471833
10/05/2018 13:30	US-MMS	DBF	12.52366528	-0.0308	0.309281662	1718.78	41.04015	25.75035	2.03197418	41.08333333	326.9040626	NaN	0.569494313	0.221953707	-0.060137011	521.3194659	601.7884907	1984.084788	60.14484672	0.452917185	220.352	0.30330785	0.22198175
12/05/2018 13:00	US-MMS	DBF	14.56524503	0.3944	0.271576836	699.466	58.9967	25.755	1.412721983	40.91333333	385.4602327	NaN	0.579656675	0.201123073	NaN	217.454163	393.058099	1264.315994	64.5315916	0.643346025	111.433	0.310885966	0.622385
13/05/2018 12:30	US-MMS	DBF	17.649729	-0.0469	NaN	1512.17	57.91665	27.5775	1.620318256	40.80833333	302.6917471	NaN	0.610755208	0.225421286	NaN	485.5203015	472.1777587	1470.614183	64.67561447	0.539822174	206.219	0.321075211	0.284339667
18/05/2018 12:30	US-MMS	DBF	18.15979807	0.2002	0.249450508	467.449	81.95585	20.49665	0.449071686	40.29333333	379.902563	NaN	0.769556229	0.349497265	NaN	174.4077451	442.2522151	1185.327839	65.41105043	0.743191127	58.65245	0.373105398	0.572002583
21/05/2018 13:30	US-MMS	DBF	21.90124854	1.1754	NaN	1186.0645	59.91	25.94835	1.397541679	40.45166667	NaN	NaN	0.860436597	0.406329221	NaN	475.9611408	247.1006412	615.7588789	64.79863924	0.875497983	243.438	0.401294483	0.60026625
27/05/2018 13:00	US-MMS	DBF	25.25822266	0.1095	NaN	1545.92	52.5733	29.9667	2.100635582	39.69333333	232.8147309	NaN	1.018126949	0.449764968	NaN	686.4321343	787.8800464	1774.391758	59.71411769	0.749575264	415.611	0.444028238	0.343546833
28/05/2018 13:00	US-MMS	DBF	28.31513626	0.3206	0.221919477	1678.42	45.0733	31.0367	2.589885448	39.54666667	203.1811836	NaN	1.04362174	0.456689348	NaN	756.9326313	894.0627488	1982.491885	58.83300111	0.79307427	340.694	0.450979273	0.299117667
02/06/2018 13:00	US-MMS	DBF	26.92956205	0.9541	0.297167745	1877.76	47.3333	28.04	2.081560296	39.24333333	273.3682087	NaN	1.070067319	0.4521956	NaN	869.7519661	598.6045344	1292.363449	50.89190029	0.62551846	381.403	0.463185906	0.533455833
05/06/2018 12:00	US-MMS	DBF	23.3929875	0.9178	0.216672539	1884.15	39.05	24.8467	1.987127121	38.77	406.1917029	NaN	1.085714286	0.449536799	-0.071726576	886.3195408	897.6352209	1908.205025	46.19341564	0.610492968	278.455	0.470408163	0.317004
08/06/2018 12:30	US-MMS	DBF	28.13227781	0.5027	0.193543576	1247.245	53.4867	28.82665	1.92634889	38.27333333	205.0934139	NaN	1.287616922	0.455043797	NaN	652.7454321	762.4256247	1456.818388	59.16870285	0.871161301	231.1375	0.523349809	0.383664479
15/06/2018 12:00	US-MMS	DBF	31.08712803	0.4899	NaN	1884.16	54.6367	27.56	1.742287455	41.32666667	NaN	NaN	1.66420068	0.492209229	-0.068676949	1154.49661	1216.333277	1985.078595	88.32304527	0.706592747	467.368	0.612738095	0.267644
24/06/2018 12:30	US-MMS	DBF	30.34584285	0.0259	0.353383172	1519.91	61.65335	24.78	1.246568187	40.8975	241.8519535	NaN	2.080836345	0.593234733	-0.030419744	1008.035988	1251.071623	1886.357525	117.4236031	0.693947127	307.111	0.66322084	0.341620583
25/06/2018 12:30	US-MMS	DBF	15.4769602	0.0145	NaN	375.4865	91.16165	21.4633	0.235981003	40.44625	NaN	NaN	2.175266617	0.598782992	NaN	254.5127027	300.0646091	442.6899272	119.3429704	0.861619458	44.86565	0.677821181	NaN
30/06/2018 12:30	US-MMS	DBF	29.12816821	0.314	NaN	1814.515	61.83165	29.75665	1.671823506	39.7425	124.5219746	NaN	2.570464853	0.613747351	-0.079104553	1341.099782	1508.304862	2040.744346	127.8190037	0.772671424	511.0515	0.739095451	0.569749917
05/07/2018 12:30	US-MMS	DBF	24.75176964	0.5588	0.285087912	1912.965	57.26335	31.04335	2.018064373	39.745	158.1939586	NaN	2.665702948	0.578907726	NaN	1443.631807	1413.00565	1872.382099	131.9261925	0.735982615	446.956	0.754656675	0.431387417
07/07/2018 12:00	US-MMS	DBF	24.59779854	0.5207	0.26980127	1884.1	53.21	22.5	1.320255649	40.77	738.1460776	NaN	2.703401361	0.565117041	-0.087842319	1433.454041	1463.987836	1924.232939	133.5519547	0.59443546	245.528	0.760816327	0.451504
08/07/2018 13:30	US-MMS	DBF	28.18906021	0.564	NaN	1697.195	60.665	27.57835	1.513989687	39.915	105.3630768	NaN	2.715056335	0.564151708	-0.049242925	1297.168727	1467.741688	1920.369958	132.3051296	0.81358499	474.906	0.764301525	0.358808
14/07/2018 13:00	US-MMS	DBF	24.256285	0.964	NaN	1859.47	53.81	29.53	1.993997252	34.41333333	NaN	NaN	2.780644133	0.558719347	NaN	1457.665143	166.7910028	212.766881	125.2886821	0.774385028	341.28	0.783914311	0.4282565
15/07/2018 12:30	US-MMS	DBF	19.76739508	0.1525	0.207796445	584.588	77.965	25.23335	0.735945808	33.9	NaN	NaN	2.790644044	0.55828464	NaN	460.0668155	1100.86769	1398.827343	124.1159531	0.981855277	75.36965	0.786993259	0.4945335
20/07/2018 13:00	US-MMS	DBF	29.31551864	0.5678	0.197583505	1685.12	66.3167	28.7033	1.384780764	32.02666667	94.49171676	NaN	2.667151183	0.66335708	-0.079823085	1299.957804	746.7685381	968.0272658	112.5138313	0.840443131	514.988	0.771433372	0.758754333
21/07/2018 12:30	US-MMS	DBF	28.17570817	0.562	0.216272874	633.6835	94.2083	20.40665	0.143285097	31.9	NaN	NaN	2.643067513	0.683848385	NaN	486.9216863	571.3283023	743.5308971	110.2511768	NaN	91.3479	0.768398872	0.632720917
23/07/2018 12:00	US-MMS	DBF	28.38860753	0.6836	0.263511983	664.582	73.43	21.6033	0.708956973	33.42666667	475.8224154	NaN	2.594387755	0.725266982	NaN	506.5878017	1067.301394	1400.170499	105.6777263	0.782823242	153.723	0.762265306	0.708248
01/08/2018 12:30	US-MMS	DBF	29.7822666	0.5105	NaN	1194.93	67.0617	22.74665	0.946565109	41.495	159.7420404	NaN	2.896425205	0.558354975	-0.047930065	958.0386627	1434.328156	1788.990164	121.2750303	0.800253938	316.293	0.801752958	0.516769917
03/08/2018 12:00	US-MMS	DBF	32.4405288	0.7407	0.258574921	1352.99	68.2067	24.8567	1.037176168	39.08666667	129.7093453	NaN	2.921147959	0.670804907	-0.084224209	1078.476843	1454.161516	1824.300636	124.5997299	0.849144596	298.43	0.797106293	0.408652
06/08/2018 12:30	US-MMS	DBF	23.723092	0.6534	0.208963765	1705.845	63.275	29.48165	1.581209411	35.74833333	174.2728961	NaN	2.958882688	0.842439013	NaN	1347.641454	1423.745814	1802.177924	129.6742715	0.775256247	305.3875	0.790014013	0.4670455
09/08/2018 13:00	US-MMS	DBF	28.53550018	0.7327	NaN	1619.45	60.1133	26.64	1.449699094	39.17666667	155.0420742	NaN	2.937226474	0.932069216	-0.01780621	1265.608897	1421.393517	1818.789152	129.060571	0.766513896	287.882	0.781505385	0.400203333
17/08/2018 12:30	US-MMS	DBF	15.74647281	-0.0407	NaN	377.7725	91.39835	22.7217	0.2466508	42.075	NaN	NaN	2.597614619	0.77476152	NaN	283.8724297	566.0323736	753.2660537	103.8154257	NaN	16.53855	0.751437518	0.695982167
19/08/2018 12:00	US-MMS	DBF	32.17148121	0.0518	0.309238125	1786.8	55.4467	26.8433	1.639229803	41.37333333	173.1172606	NaN	2.539838435	0.765315983	-0.07723519	1327.876526	1165.649245	1568.505829	105.8770576	0.796218073	348.17	0.743159014	0.43962
21/08/2018 13:00	US-MMS	DBF	22.9513735	0.7999	0.310763808	949.965	75.7467	23.9967	0.750629004	39.8875	245.9224187	NaN	2.480237741	0.755572166	NaN	697.8624172	929.3749509	1265.111365	108.0037937	0.807425169	147.184	0.734619083	0.5414455
26/08/2018 13:00	US-MMS	DBF	22.7010164	0.639	0.271077961	1626.4	68.3367	30.04	1.408484737	38.8725	141.8990502	NaN	2.231898384	0.699104328	-0.045192673	1150.093685	1264.401911	1788.048482	106.4118227	0.820729585	304.882	0.707140731	0.344766
01/09/2018 13:00	US-MMS	DBF	15.46389081	-0.1267	0.264406493	318.019	90.5533	22.6467	0.268992908	36.825	NaN	NaN	1.756115009	0.574690973	-0.032846475	210.6252096	1037.804723	1566.961622	92.6280248	NaN	-13.8259	0.662303855	0.389171333
06/09/2018 13:00	US-MMS	DBF	28.02134534	0.4742	0.270141444	1692.73	63.32	28.74	1.51126319	34.9725	193.166021	NaN	1.387875213	0.475967092	NaN	967.2589322	852.5782872	1492.035686	75.27495124	0.749878578	441.569	0.571419501	0.491553333
16/09/2018 13:00	US-MMS	DBF	15.4217206	0.7694	NaN	1092.47	67.0833	26.9567	1.219367782	39.605	91.26061983	NaN	0.952103529	0.28788318	-0.037824054	527.9386048	752.3867952	1556.923466	67.96211902	1.063456833	147.911	0.483252268	0.227475603
23/09/2018 12:30	US-MMS	DBF	21.67677252	0.112	0.303343957	NaN	61.545	21.21165	1.005691567	37.2	NaN	NaN	0.71136143	0.264774803	-0.05602538	NaN	635.3720683	1604.806888	50.84601927	0.629009217	194.995	0.395918084	0.235914944
08/10/2018 13:00	US-MMS	DBF	20.2738271	-0.0548	0.389021917	1307.43	57.4567	27.6667	1.644428671	36.055	118.4102416	NaN	0.537040462	0.194990221	-0.043326368	474.342219	482.3284288	1329.442399	50.80459239	0.906785562	274.766	0.36280506	0.254078422
15/10/2018 12:30	US-MMS	DBF	8.661117695	0.3713	NaN	239.452	89.36835	6.991665	0.108107839	36.38125	NaN	NaN	0.555195313	0.185538924	NaN	91.17739808	233.5421119	613.3332049	32.35166364	0.311273495	45.26437	0.380775262	0.262517763
19/10/2018 13:00	US-MMS	DBF	9.327663017	0.356	0.337095893	267.147	57.47	10.2967	0.541662962	35.85	162.824164	NaN	0.63319409	0.190955149	NaN	107.4703351	126.8146428	315.2325835	21.11300663	0.992586075	50.9148	0.402289133	0.267379832
03/05/2019 13:30	US-MMS	DBF	15.12767817	0.2565	NaN	677.095	90.57235	16.5054	0.182109006	43.29	249.3886076	NaN	0.557776892	0.258877015	NaN	191.6680122	321.8964732	1137.145891	61.51640464	0.529989587	88.5531	0.283074033	0.5515355
11/05/2019 12:30	US-MMS	DBF	14.33435364	0.0548	NaN	609.6265	62.0409	13.56805	0.60293648	42.0325	NaN	NaN	0.391736997	0.1341221	NaN	137.4367564	43.85222825	194.5147799	NaN	0.615659463	74.37985	0.225444196	0.939554083
13/05/2019 12:00	US-MMS	DBF	17.14892313	0.0171	0.45193518	739.804	97.0617	11.548	0.04074861	42.05333333	NaN	NaN	0.395982143	0.135857793	NaN	168.7567785	283.5190108	1242.904138	NaN	0.566137849	94.3531	0.228110119	0.281724
28/05/2019 12:00	US-MMS	DBF	31.2818947	-0.3287	0.396535709	1789.5	61.6144	25.9997	1.342269894	42.1325	143.3002393	NaN	0.827346939	0.229952275	NaN	723.9318776	679.2731395	1679.107276	29.07664609	0.648266754	398.087	0.404544218	0.281444
31/05/2019 13:00	US-MMS	DBF	30.78096504	0.0903	0.445221859	1536.8	60.3519	21.9851	1.083447402	41.045	278.2649413	NaN	0.844831349	0.273187177	NaN	604.8541295	715.6028014	1818.187777	47.79124737	0.590095077	258.5	0.393580251	0.298859833
05/06/2019 13:00	US-MMS	DBF	23.79262964	0.5479	0.307060739	1749.96	83.38544576	24.8546	0.541938457	38.6325	141.9882733	NaN	0.873408447	0.343170099	-0.031466667	657.7233092	748.0779601	1990.360519	78.18337272	0.680010547	205.544	0.375850482	0.306504667
08/06/2019 12:00	US-MMS	DBF	19.76929867	0.4484	0.311366096	646.975	82.2689	20.7627	0.448800099	37.6125	205.4110307	NaN	0.878741497	0.307961863	NaN	249.7345506	331.1649468	857.9327167	70.00144676	0.758328846	91.5447	0.386003401	0.716388
11/06/2019 12:30	US-MMS	DBF	24.81569056	1.0327	0.426750068	1942.345	36.58	20.7725	1.606480183	42.27375	237.890555	NaN	0.884187217	0.272009791	-0.029944001	769.8888787	763.3506563	1925.849783	61.64666321	0.625921705	402.4695	0.396370819	0.2877545
14/06/2019 13:30	US-MMS	DBF	27.02622763	0.3478	0.328659862	1734.66	36.5468	20.8584	1.616381725	39.80125	226.5098682	NaN	0.90550861	0.269473824	NaN	701.0963134	716.1651462	1771.943467	61.92446108	0.647437125	275.6525	0.404169297	0.3466195
16/06/2019 13:00	US-MMS	DBF	23.12301011	0.5325	0.48638012	749.381	97.5583	22.3505	0.068259244	44.255	126.2946486	NaN	0.938578869	0.308626563	NaN	304.2811183	613.1317807	1510.015835	72.63826598	0.683714413	88.8104	0.406043279	0.8264115
30/06/2019 11:30	US-MMS	DBF	25.21028457	0.4526	NaN	1819.165	61.33175	27.8236	1.509920124	38.3775	152.2795747	NaN	1.24009708	0.413291021	-0.048780986	927.8147564	984.5860583	1930.476406	88.21961203	0.723551019	304.356	0.510022321	0.23252875
02/07/2019 12:30	US-MMS	DBF	24.05309761	0.475	NaN	1831.33	60.48455	27.8374	1.54376404	38.66625	144.3524953	NaN	1.293916525	0.419560033	-0.035846764	957.4830935	1030.850892	1971.656916	92.13339723	0.75113868	293.4545	0.522834821	0.250827417
08/07/2019 12:30	US-MMS	DBF	25.19638946	0.6985	NaN	1890.05	58.40525	25.07245	1.375535007	35.58	132.8913676	NaN	1.455552012	0.437444249	NaN	1060.935008	1004.010935	1788.640071	101.3049132	0.781013157	370.601	0.561326424	0.349787917
13/07/2019 12:30	US-MMS	DBF	23.04418032	0.5543	NaN	1930.795	44.2257	26.0497	1.957943144	32.0425	178.6171366	NaN	1.604361536	0.450156918	-0.08449427	1152.319923	1219.514543	2043.384424	99.47637027	0.766409255	390.7765	0.596811118	0.330650083
16/07/2019 11:30	US-MMS	DBF	25.94484128	0.1165	NaN	1078.831	76.6683	24.9433	0.766452311	30.65125	147.0659786	NaN	1.695529514	0.452059003	NaN	667.5217504	719.4213848	1162.709817	99.34125568	0.811595392	185.22	0.618745429	0.60245575
18/07/2019 12:30	US-MMS	DBF	28.71300183	-0.0128	NaN	1881.565	64.46785	27.80565	1.38557312	37.08625	114.9878429	NaN	1.762803819	0.445532595	-0.086247247	1195.157568	1250.075976	1968.024356	100.5687237	0.753781756	415.565	0.635193346	0.395713417
23/07/2019 13:00	US-MMS	DBF	27.86654764	1.7156	0.266116429	1935.85	46.8321	22.3203	1.483552272	34.09	233.4419456	NaN	1.927014243	0.429639803	-0.079525685	1307.38841	1441.290346	2134.118594	103.5856187	0.684597911	411.672	0.675356257	0.313982
29/07/2019 12:30	US-MMS	DBF	24.20203635	-0.2469	0.262965823	916.701	65.28895	25.19445	1.156653555	29.9325	71.67709427	NaN	1.947605761	0.433034139	NaN	625.694797	150.4560188	220.4320439	106.9400573	1.013022656	210.921	0.682550578	0.848223917
20/04/2018 12:30	US-NC3	ENF	5.849935929	0.7235	0.525140264	2060.807	30.35901	14.14781	1.149591824	39.8923	400.8730222	696.5942	0.86888694	0.21533236	-0.06046727	868.6132473	817.8291648	1940.320474	38.27039931	0.302483861	171.62182	0.421491798	0.328629833
29/04/2018 13:00	US-NC3	ENF	8.108265018	1.7136	NaN	2045.299	38.26557	17.70807	1.286225757	38.48	345.7990779	680.7594	0.881735048	0.257760324	NaN	872.9212069	856.9022615	2007.765792	44.96943051	0.437230157	276.590782	0.426793934	0.341524333
30/04/2018 13:00	US-NC3	ENF	7.951520733	1.1328	0.497350564	2017.058	27.82268	19.63789	1.701477202	37.6409	316.9148278	664.0041	0.877049674	0.253007161	-0.06130897	860.4427534	881.7749162	2067.065057	46.07218257	0.416856862	247.537448	0.42658305	0.279280167
11/05/2018 13:00	US-NC3	ENF	1.638004271	0.7732	0.539288538	2003.445	47.06364	29.04902	2.22129601	37.4019	167.2171393	670.8084	0.993947704	0.291184677	-0.052963237	897.5773612	944.8456964	2108.95068	46.70179077	0.687783712	419.649535	0.448016971	0.272281667
25/05/2018 13:30	US-NC3	ENF	11.25596103	2.1577	0.524049699	1926.214	59.84881	27.99608	1.58276023	32.6189	39.53679867	636.8134	0.90971301	0.3312683	-0.05260061	784.7552054	746.0387224	1831.182796	62.87887008	0.786615584	575.933929	0.40740811	0.28623525
01/06/2018 13:00	US-NC3	ENF	14.95556623	1.1117	0.560430316	2123.56	68.11476	30.85328	1.487458202	36.8512	57.89244627	739.0077	0.998164328	0.37145929	-0.056598908	920.5780069	928.8103514	2142.55011	52.09267699	0.812453027	634.629476	0.433506944	0.287259333
07/06/2018 12:30	US-NC3	ENF	15.26121396	2.1792	0.497244827	1399.785	65.81027	25.43005	1.154972098	33.7488	NaN	480.4852	1.051130952	0.37981392	-0.071428571	647.4691284	916.2257703	1980.818905	46.21024426	NaN	NaN	0.462548983	0.402617583
16/06/2018 13:00	US-NC3	ENF	10.61062024	2.0181	NaN	2046.922	45.96423	29.04188	2.266472329	32.2005	223.5753562	764.9343	1.166654266	0.369261627	NaN	968.5895803	872.3795357	1843.60115	50.47602398	0.844258411	524.792061	0.473193204	0.393904333
22/06/2018 13:00	US-NC3	ENF	16.25413037	2.8612	0.590400105	1865.082	67.49742	31.45994	1.570731684	40.8453	173.6623236	716.7167	1.256857639	0.330953391	NaN	918.1770469	909.3551849	1847.162258	51.18021396	0.899696349	474.5292	0.492298487	0.386159
24/06/2018 12:00	US-NC3	ENF	15.81126682	2.0999	NaN	2119.739	63.54828	31.53947	1.769728436	40.6815	NaN	826.2709	1.229464286	0.315363644	-0.055413815	1030.880807	960.0282851	1974.049165	52.81876929	NaN	NaN	0.486324405	0.295324
03/07/2018 12:30	US-NC3	ENF	8.959465427	1.7904	0.463137622	1498.944	76.06969	29.93912	1.05821266	34.1332	670.9174774	612.1193	1.220554315	0.298311663	-0.055475157	747.1481562	857.9177455	1721.172229	53.62835166	0.877654956	232.8032	0.498449679	0.304739083
09/07/2018 12:30	US-NC3	ENF	19.12908075	2.123	0.478838153	1820.934	51.07407	26.62698	1.776840681	29.9362	NaN	689.1741	1.341998388	0.40304282	-0.046448775	968.8108409	1110.076974	2086.451575	51.19081348	NaN	NaN	0.532040613	0.402180917
10/07/2018 12:00	US-NC3	ENF	12.55407191	3.0056	NaN	2140.024	45.84021	28.75582	2.23354527	28.8347	NaN	820.617	1.371577381	0.442879099	-0.058254602	1145.315914	1056.344459	1973.780741	51.62760417	NaN	NaN	0.53518835	0.27382
11/07/2018 13:30	US-NC3	ENF	9.346324451	2.1873	0.441800717	1884.191	48.40047	33.14262	2.747817968	27.4809	NaN	701.4551	1.403673735	0.486105699	NaN	1014.832773	1016.521357	1887.326112	52.10156853	NaN	NaN	0.538603981	0.401911
13/07/2018 13:00	US-NC3	ENF	12.7854242	2.6324	NaN	2078.343	63.86696	28.12	1.43491432	26.2169	NaN	805.7086	1.463461062	0.566625836	NaN	1132.627164	835.69309	1533.476275	52.98444332	NaN	NaN	0.544966429	0.396207833
14/07/2018 12:30	US-NC3	ENF	11.31840034	2.4521	0.478019717	2173.748	57.14641	27.71025	1.660735576	25.4101	NaN	839.3022	1.493040055	0.606462115	-0.063274965	1191.462074	1154.582768	2106.464013	53.42123401	NaN	NaN	0.548114167	0.310580917
18/07/2018 13:00	US-NC3	ENF	17.02050064	1.8747	NaN	1928.598	66.86359	29.27568	1.409195036	21.6862	NaN	750.6532	1.529434347	0.584164631	NaN	1093.109414	1124.678865	1984.296706	56.82106803	NaN	NaN	0.566789665	0.461110667
19/07/2018 12:30	US-NC3	ENF	8.614142396	2.3316	0.451064595	2011.594	48.42023	29.58295	2.233623792	20.7216	209.8240675	799.5427	1.531628313	0.564162667	-0.067928777	1150.205968	1172.189122	2050.040314	57.77492445	0.760549964	576.111173	0.571788327	0.29256825
27/07/2018 13:30	US-NC3	ENF	16.60058854	1.8272	0.571670872	1982.609	84.47017	28.4721	0.629763815	31.803	NaN	772.4642	1.644087302	0.461060088	NaN	1207.307956	744.1507436	1222.02455	76.77589699	NaN	NaN	0.608949095	0.4264915
14/08/2018 13:00	US-NC3	ENF	13.41279045	2.0763	NaN	1728.879	69.40702	29.78911	1.340970421	36.2346	319.6481454	711.4607	2.03342191	0.486450486	NaN	1194.404302	851.4548331	1232.465739	123.9672081	1.018681948	470.876008	0.690854769	0.822412
20/08/2018 13:00	US-NC3	ENF	14.4395924	2.1314	0.548592244	1874.728	79.56049	29.21644	0.866199083	36.7671	NaN	773.5925	2.044511763	0.447611618	-0.054149373	1305.124604	1123.169436	1613.361041	115.6580209	0.861664116	270.075538	0.696167446	0.4262855
24/08/2018 13:00	US-NC3	ENF	13.31502047	2.1318	NaN	1602.987	56.82134	26.9217	1.596153859	32.7205	NaN	665.3232	2.044838081	0.393519111	-0.089078234	1123.313303	1203.934784	1718.035212	102.1876875	NaN	NaN	0.700762578	0.424786667
26/08/2018 12:30	US-NC3	ENF	10.452317	1.5313	0.499586833	1949.228	57.55135	28.92023	1.767700472	30.4644	198.6841652	812.8793	1.961211558	0.391594317	-0.077541125	1335.775443	1301.76914	1899.604361	96.75999603	0.874305928	630.044513	0.68528435	0.41596325
29/08/2018 13:30	US-NC3	ENF	10.21893666	2.2746	0.478117922	1816.568	59.73893	32.06856	2.015481018	26.9029	NaN	742.4686	1.832690795	0.388636214	-0.041302579	1201.653843	1049.028364	1585.840521	88.41849119	NaN	NaN	0.661496758	0.4244015
30/08/2018 13:00	US-NC3	ENF	15.63554628	1.5789	NaN	1615.485	63.59575	32.83489	1.904687113	25.8057	NaN	669.7327	1.791317673	0.387683948	-0.073913226	1056.267272	1189.853672	1819.795812	85.73321223	NaN	NaN	0.653839109	0.457616167
02/09/2018 12:00	US-NC3	ENF	7.437543031	1.6987	0.499805359	1282.298	76.95121	29.72051	1.006222255	23.3559	NaN	545.8648	1.647638889	0.391893661	-0.015151515	796.4050113	946.1965646	1523.478563	75.02290702	NaN	NaN	0.621076389	0.390316
04/09/2018 13:00	US-NC3	ENF	7.907107948	1.4678	NaN	1824.955	61.21321	31.46278	1.874733783	21.4336	NaN	782.4358	1.523234954	0.404376912	NaN	1068.428248	865.6599967	1478.611729	64.12092295	NaN	NaN	0.585454572	0.4177625
07/09/2018 12:00	US-NC3	ENF	10.52377258	1.2015	NaN	2025.513	62.65619	30.888	1.745632751	18.9575	NaN	883.9035	1.34297619	0.422464888	-0.013280969	1081.298413	716.2191789	1341.638201	48.32417052	NaN	NaN	0.533839286	0.158819667
09/09/2018 13:30	US-NC3	ENF	5.842820461	1.0607	NaN	1785.304	62.70391	31.49547	1.806105436	17.5625	NaN	741.5363	1.222157118	0.434468544	NaN	891.6396857	537.3328426	1075.885796	37.77973191	0.920308469	336.7227	0.499432974	0.41618575
12/09/2018 12:30	US-NC3	ENF	14.59597534	1.1605	NaN	1728.985	68.9105	30.96838	1.460099642	17.0038	NaN	759.0191	1.271668113	0.423826394	-0.067708371	903.4926826	733.122756	1402.95353	44.1723817	NaN	NaN	0.522556692	0.373817667
17/04/2019 13:00	US-NC3	ENF	16.99965608	1.1345	0.544457626	1946.974	39.98243	26.72297	2.192281584	32.1906	125.108297	578.1179	0.926383574	0.246850077	-0.05501021	857.0490698	828.7160333	1882.609324	49.42930036	0.618118363	365.91	0.440195437	0.2878955
18/04/2019 12:30	US-NC3	ENF	17.02901402	0.7997	0.483735602	2010.462	53.47837	26.32066	1.658620292	31.7804	109.6271397	612.8015	0.951638499	0.257915543	NaN	901.9173369	824.3574868	1837.573505	47.9867943	0.603003775	395.234	0.448611979	0.366542083
22/04/2019 13:00	US-NC3	ENF	15.56480849	0.2566	0.533945188	1535.791	48.52876	21.3834	1.354608602	31.6876	175.6880163	464.76525	1.005283801	0.281425438	-0.062608392	715.1083979	895.2165586	1922.597382	51.59344457	0.783679246	251.075	0.46562872	0.2750985
27/04/2019 13:00	US-NC3	ENF	22.40259334	1.3716	NaN	2021.059	35.73307	21.77476	1.733288549	29.2405	83.76667617	615.0072	1.062001488	0.30535496	-0.061650993	977.5206241	953.2600476	1970.899387	55.96620745	0.670769187	470.558	0.483667535	0.3410355
28/04/2019 12:30	US-NC3	ENF	21.55519832	2.2049	0.467252569	1098.644	43.65916	25.0531	1.860117391	28.7745	23.54283613	349.23721	1.065673363	0.306092921	-0.056732916	532.7071212	969.8757086	2000.25133	56.73905152	0.793908214	424.675	0.484876922	0.290877083
04/05/2019 12:30	US-NC3	ENF	25.99112472	1.1797	0.423959795	1618.724	66.92106	27.58265	1.272197893	23.692	NaN	541.10757	1.0875	0.310355773	NaN	796.4397086	772.4101375	1569.885095	61.33844823	0.756354987	632.056244	0.492016989	0.404230583
14/05/2019 13:00	US-NC3	ENF	26.56302729	3.3233	0.421278731	2211.825	52.37944	20.78327	1.206908073	19.5243	NaN	701.8324	0.869246032	0.236058396	NaN	896.5722054	513.2836107	1266.260002	22.81926159	NaN	NaN	0.405354043	0.321066708
25/05/2019 12:30	US-NC3	ENF	18.00983704	1.6359	0.367442766	1672.965	43.87215	30.6185	2.582750376	13.4488	251.4454588	565.21796	0.981747892	0.275474017	-0.047345967	737.3758169	893.3430734	2026.824939	38.691567	0.718658226	414.215003	0.440759859	0.361534417
28/05/2019 13:30	US-NC3	ENF	13.43204612	1.568	0.372116936	NaN	39.07728	34.77793	3.561173114	12.6271	291.5989587	632.3069	1.030778858	0.265765308	-0.02009145	NaN	785.1798835	1748.230618	35.42827088	0.794734028	405.395534	0.449128322	0.41451175
29/05/2019 13:00	US-NC3	ENF	13.63408043	1.8144	NaN	1710.633	38.93682	35.40718	3.698596369	12.3344	105.9634171	491.19968	1.016869863	0.260926749	NaN	760.8851521	798.9608064	1796.235237	37.42334185	0.708110289	479.259129	0.444797424	0.361459833
02/06/2019 13:30	US-NC3	ENF	28.16389822	1.9097	0.495095523	933.3196	59.53465	28.2499	1.619425487	13.1366	NaN	331.00469	0.959754199	0.241057773	NaN	398.5396962	766.2820847	1794.51657	45.61586733	0.880442208	648.003	0.427013101	0.38820075
03/06/2019 13:00	US-NC3	ENF	25.8050656	1.591	NaN	1844.64	55.45911	25.72664	1.53197039	12.795	44.13415975	567.3757	0.945845203	0.236219214	NaN	779.6964991	818.3055536	1935.982986	47.6109383	0.795844914	540.627	0.422682203	0.371629833
04/06/2019 13:00	US-NC3	ENF	19.71982629	1.6982	0.435357841	2014.305	45.19643	25.61637	1.872391172	12.4718	NaN	613.8775	0.931640271	0.231277707	-0.053223629	842.501515	894.6757156	2139.046322	49.64845759	NaN	NaN	0.418259159	0.315503667
06/06/2019 12:00	US-NC3	ENF	26.50927396	1.8888	NaN	2034.846	70.87283	30.25278	1.311932449	12.6238	33.74246653	638.2331	0.946896259	0.238513147	-0.046236592	864.4582968	794.5949092	1870.394765	52.51012731	0.891102704	591.229	0.424827381	0.321796
14/06/2019 13:00	US-NC3	ENF	22.29143172	2.7738	NaN	2121.029	36.34882	24.27048	2.003343853	17.2842	NaN	656.661	1.155512153	0.34546642	-0.0625	1060.110758	1049.413764	2099.626865	58.07723685	NaN	NaN	0.499809648	0.368152
15/06/2019 12:30	US-NC3	ENF	26.28908017	2.5976	0.474389534	2116.684	41.20473	26.31423	2.095395215	16.5141	NaN	658.5424	1.16165276	0.367232985	-0.058201878	1056.612876	1047.904679	2099.239105	57.32879011	NaN	NaN	0.499183098	0.310913917
16/06/2019 12:30	US-NC3	ENF	24.90871109	2.4864	NaN	NaN	61.01745	29.18213	1.648685272	15.878	16.66312873	573.36	1.167924019	0.389462669	NaN	NaN	953.8478204	1913.27008	56.56441897	0.902786153	592.838	0.498543217	0.391856917
18/06/2019 13:30	US-NC3	ENF	24.24935712	1.3489	0.413521949	1515.175	65.12582	30.78674	1.620591401	14.6959	NaN	515.93761	1.180727838	0.434848274	NaN	753.4007581	772.5541893	1553.694739	55.00382788	NaN	NaN	0.497236793	0.312207
24/06/2019 13:00	US-NC3	ENF	20.01478121	2.789	NaN	2079.683	60.514	30.49211	1.803595711	13.4898	50.49278711	648.6519	1.174927544	0.421376536	NaN	1022.300217	943.606138	1919.594275	48.60973803	0.809564751	594.159	0.491565405	0.359788167
25/06/2019 13:00	US-NC3	ENF	20.78147092	3.1301	NaN	1864.344	55.45742	31.57163	2.166577259	13.1988	NaN	515.1514	1.166964109	0.395479078	NaN	914.1229253	911.9028043	1859.816087	47.24576555	NaN	NaN	0.490318807	0.442084
30/06/2019 13:00	US-NC3	ENF	15.45279635	3.0482	NaN	1933.054	42.61592	35.11983	3.419836535	12.008	61.48779186	615.7543	1.145362812	0.295121411	NaN	944.4622132	954.7624724	1954.135793	43.16704309	0.820683201	622.599	0.48858553	0.399780833
02/07/2019 12:30	US-NC3	ENF	20.55975796	2.0597	NaN	NaN	51.00623	32.07553	2.453630612	11.6151	NaN	419.53	1.164212018	0.299212307	-0.061507937	NaN	964.9237203	1950.65009	45.67568011	NaN	NaN	0.494667765	0.4115035
04/07/2019 13:30	US-NC3	ENF	17.92439096	2.4717	NaN	NaN	60.0551	33.78865	2.207243353	11.2319	593.7948073	541.0134	1.183656463	0.303432388	NaN	NaN	733.929175	1465.097899	48.26353725	0.508397618	222.033	0.500942071	0.39415075
28/04/2018 13:30	US-NR1	ENF	9.218869422	0.6231	0.130913982	1149.91	34.97	11.11	0.875442153	21.1	NaN	454.81	0.788759566	0.190951093	NaN	415.801308	607.2493242	1679.364776	24.11114728	0.018150087	4.68	0.361594653	0.2481535
29/04/2018 13:00	US-NR1	ENF	10.86245791	1.7136	0.195301875	954.87	21.52	11.22	1.064430822	23.4	NaN	369.42	0.812489371	0.197004537	NaN	354.2480076	376.0294875	1013.581641	25.6489653	0.267515593	51.47	0.370990823	0.310069833
30/04/2018 13:00	US-NR1	ENF	13.25968887	1.1328	NaN	1607.1	30.55	7.81	0.744885114	21.4	NaN	681.19	0.836724065	0.203186777	NaN	611.641226	626.5522217	1646.27895	27.21950285	0.14503443	47.39	0.380586912	0.276568833
01/05/2018 12:30	US-NR1	ENF	10.35860069	0.4205	0.130070968	560.06	97.49	2.06	0.017849137	21.6	NaN	230.07	0.860453869	0.209240221	NaN	218.4139248	439.8649509	1127.907777	28.75732087	0.083035298	16.02	0.389983082	0.573407667
11/05/2018 13:00	US-NR1	ENF	11.57529858	0.7732	0.146006512	469.88	89.26	8.05	0.117135568	25.1	NaN	204.05	1.133843537	0.282516995	NaN	218.8772761	713.0314728	1530.717279	40.28454272	0.248521938	23.96	0.465815264	0.273280333
12/05/2018 12:30	US-NR1	ENF	17.60219529	1.3033	0.178992606	801.6	99.39	6.61	0.006014438	26.7	NaN	348.03	1.161829471	0.290594005	NaN	378.6551042	170.1031897	360.1026776	41.24827862	0.247263293	69.57	0.472374132	0.710957167
23/05/2018 12:30	US-NR1	ENF	16.9415917	0.8242	0.216268304	1732.51	39.4	11.77	0.853123327	32.2	NaN	792.48	1.301961983	0.43956701	NaN	863.8037721	893.5599476	1792.19123	49.46654101	0.478286328	294.06	0.498585158	0.293616333
07/06/2018 12:30	US-NR1	ENF	16.38642522	1.3944	0.090377348	2026.5	18.75	18.4	1.76985256	16.1	386.2107797	829.58	0.86963772	0.227804433	NaN	794.7876062	670.8828737	1710.57542	26.14304028	NaN	187.39	0.39219719	0.297590833
22/06/2018 13:00	US-NR1	ENF	15.8852383	2.8612	0.194665158	1662.68	32.28	16.16	1.27611763	14.6	188.1802706	699.44	0.805759283	0.279916532	NaN	608.2309243	336.374142	919.523385	25.30837406	0.412327141	257.02	0.365813581	0.257453167
24/06/2018 12:00	US-NR1	ENF	17.57344458	2.0999	0.160355074	1067.56	94.66	3.01	0.040696839	12.7	NaN	517.25	0.805076531	0.309635272	NaN	384.9929101	78.60932543	217.9784855	23.78472222	0.661959135	66.09	0.360628827	0.882764
03/07/2018 12:30	US-NR1	ENF	14.71604452	1.7904	NaN	772.71	21.68	18.97	1.769402979	6.7	340.6476556	201.81	0.7757072	0.357370697	NaN	263.5780297	546.5568575	1602.295722	20.98688406	0.650615455	114.17	0.341108604	0.27084
09/07/2018 12:30	US-NR1	ENF	14.84042287	2.123	0.12679382	1888.07	39.46	18.8	1.352943168	6.3	145.5126405	709.39	0.742851297	0.338054069	NaN	627.6291803	637.9337413	1919.06877	22.43498291	0.445628562	283.09	0.332418385	0.312634417
11/07/2018 13:30	US-NR1	ENF	12.67215277	2.1873	NaN	1802.58	30.59	20.13	1.688091554	6.1	507.2403775	714.59	0.73727838	0.346675996	NaN	594.707412	625.889669	1897.094566	22.80584893	NaN	188.82	0.329920121	0.327282
13/07/2018 13:00	US-NR1	ENF	8.033792554	2.6324	0.158904005	371.69	77.09	11.9	0.325370658	6	NaN	124.58	0.731876063	0.355033987	NaN	121.727856	606.5524735	1852.078039	23.1653619	0.830944228	143.18	0.327498335	0.3411305
14/07/2018 12:30	US-NR1	ENF	14.25353245	2.4521	0.10117516	1029.32	40.32	18.72	1.326917888	5.9	276.0453296	395.18	0.729203338	0.359168993	NaN	335.8673093	639.1830664	1958.880474	23.34322622	0.615284394	151.12	0.326300188	0.306288458
18/07/2018 13:00	US-NR1	ENF	15.48184274	2.0349	NaN	1591.16	28.64	19.12	1.627667631	9.2	366.5747001	643.42	0.740549178	0.35047083	NaN	524.8576901	605.747808	1836.386701	26.83128912	0.544705301	231.32	0.329858525	0.329554
27/07/2018 13:30	US-NR1	ENF	14.6972207	1.8272	NaN	1027.14	81.8	15.34	0.325031579	14	182.7841613	444.69	0.887176339	0.422368583	NaN	384.2837201	320.7548261	857.3355959	29.35394162	0.540145985	197.58	0.374129836	0.3103505
14/08/2018 13:00	US-NR1	ENF	16.29422102	2.0763	0.118932713	834.09	81	13.44	0.299218491	5.3	562.0749084	352.31	0.887572633	0.420938818	NaN	319.8463562	436.2841412	1137.734516	23.25471268	0.282296651	92.04	0.383467439	0.37403
20/08/2018 13:00	US-NR1	ENF	16.34844486	2.1314	NaN	1638.78	60.19	13.67	0.63662372	5.1	NaN	724.15	0.854806193	0.395398474	NaN	615.3748381	630.8816737	1680.075631	22.60675208	NaN	116.27	0.375507901	0.283142833
24/08/2018 13:00	US-NR1	ENF	13.13126573	2.4655	0.1498875	1637.28	35.39	16.44	1.239943131	5.1	NaN	719.6	0.842004677	0.380056898	NaN	611.3844494	609.7196229	1632.821615	24.27993586	0.209656981	95.96	0.373414718	0.310672333
26/08/2018 12:30	US-NR1	ENF	12.46861783	1.5313	0.117317139	1791.81	32.87	17.68	1.396112016	5.1	NaN	782.23	0.801512543	0.371304844	NaN	647.0656404	595.6494001	1649.431657	22.45214643	NaN	118.22	0.361124026	0.336332833
30/08/2018 13:00	US-NR1	ENF	10.70725569	1.5789	0.125460885	1741.8	20.57	18.97	1.794480065	5	NaN	747.45	0.719249575	0.353524357	NaN	585.5139323	445.7202339	1325.938565	18.7388479	0.16817125	80.29	0.336154514	0.366024667
04/09/2018 13:00	US-NR1	ENF	10.28313658	1.4678	0.101398983	428.44	47.71	11.69	0.732164579	4.8	NaN	153.8	0.69951318	0.348924907	NaN	146.1065256	526.2287837	1543.103288	18.03288296	0.063083729	3.85	0.341019806	0.346744667
07/09/2018 12:00	US-NR1	ENF	16.97599346	1.2015	0.179749004	979.73	71.74	11.76	0.397573833	5.8	327.3680825	441.52	0.719285714	0.352874138	NaN	350.3317868	615.844662	1722.257339	19.10525977	0.301634035	122.94	0.357579932	0.27608
08/09/2018 13:30	US-NR1	ENF	10.00219408	0.8944	0.13951567	1522.63	27.64	17.22	1.460812545	5.6	NaN	661.05	0.726387117	0.354292524	NaN	553.5180036	555.7930624	1528.888284	19.49040919	0.25389464	99.09	0.363527583	0.272526
09/09/2018 13:30	US-NR1	ENF	9.341567895	1.0607	0.156041045	278.78	32.08	15.18	1.200284012	5.3	NaN	85.87	0.732270408	0.355349341	NaN	102.7867905	590.2406461	1600.860252	19.78744695	0.637256685	35.03	0.368702168	0.2979025
12/09/2018 12:30	US-NR1	ENF	8.790466246	1.1605	0.153299137	1626.34	20.08	18.53	1.75544861	4.9	NaN	692.05	0.714158163	0.346133555	NaN	593.9892231	608.2830529	1665.476446	17.76158211	0.1676733	79.12	0.365230655	0.258751667
22/04/2019 13:00	US-NR1	ENF	4.318654873	0.2566	0.14057279	243.62	100	-2.55	0	20.1	NaN	64.29	0.790392928	0.262071616	NaN	87.94320333	84.16303667	233.1481936	24.82843177	0.415586952	63.83	0.360985154	0.786822
27/04/2019 13:00	US-NR1	ENF	10.56839764	1.3716	0.146136197	1648.54	48.89	6.7	0.507136592	21.4	NaN	802.68	0.881069303	0.291567205	NaN	661.2173384	643.9610155	1605.51672	28.86110575	NaN	79.6	0.401092687	0.360570167
04/05/2019 12:30	US-NR1	ENF	7.05431192	1.1797	0.138634181	1414.05	34.57	6.46	0.638333805	21.2	NaN	629.17	1.000267857	0.307568536	NaN	608.4052957	676.8279252	1573.077247	32.08192006	0.129676964	53.27	0.430257272	0.371051583
09/05/2019 12:30	US-NR1	ENF	2.581004409	2.0362	0.126145859	633.01	99.78	-7.25	0.000769976	21.3	NaN	175.73	1.064553571	0.313448779	NaN	280.4379914	166.4822318	375.7868791	37.29829095	0.0695355	9.97	0.443023003	0.66456475
13/05/2019 13:00	US-NR1	ENF	10.21872763	0.3498	0.180630346	1726.51	35.32	10.69	0.846190605	22.1	NaN	752.57	1.135528805	0.321533878	NaN	790.4888185	783.368874	1710.959299	41.11971129	0.141648078	64.77	0.4578536	0.391688
14/05/2019 13:00	US-NR1	ENF	8.714180424	3.3233	0.160678361	565.79	31.4	10.44	0.882291573	22.3	NaN	201.46	1.166893601	0.325932073	NaN	262.9729536	569.5699352	1225.437709	41.80451067	0.276937071	66.98	0.464788974	0.350984167
25/05/2019 12:30	US-NR1	ENF	10.38956507	1.6359	0.14898831	1528.44	56.67	7.23	0.446255731	22	NaN	678.3	1.596449121	0.453054055	NaN	844.0903045	987.6879585	1788.460044	53.41505514	0.117129587	38.08	0.552256094	0.39078075
28/05/2019 13:30	US-NR1	ENF	8.363778105	1.568	0.160120848	366.92	73.06	-0.282	0.161126229	23.3	NaN	127.44	1.73881351	0.513581718	NaN	212.5647258	472.902719	816.3041398	57.89006237	0.160693889	22.51	0.579321721	0.37927725
29/05/2019 13:00	US-NR1	ENF	7.750771589	1.0748	0.169021764	757.59	100	-1.02	0	23	NaN	300.33	1.713297725	0.523733765	NaN	435.157546	704.3661096	1226.270177	57.99709576	0.317931137	42.66	0.574397162	0.598126333
03/06/2019 13:00	US-NR1	ENF	17.68063974	1.591	0.21217815	1443.22	37.69	12.27	0.907287286	25.1	NaN	611.79	1.583004358	0.575574004	NaN	792.6892753	418.7077992	762.3257798	58.54364926	0.471246208	149.14	0.549250478	0.333359
04/06/2019 13:00	US-NR1	ENF	11.46489968	1.5982	NaN	704	45.88	12.07	0.777486323	26.2	NaN	273.77	1.556945685	0.585942052	NaN	383.1316837	675.1212591	1240.527439	58.65295996	0.501463097	92.54	0.544221142	0.4337835
06/06/2019 12:00	US-NR1	ENF	17.08719291	1.8888	0.200957866	1679.67	50.78	12.89	0.747155066	26.1	NaN	789.41	1.516241497	0.575604545	NaN	899.9717565	1089.121114	2032.690525	59.10172325	0.578812682	296.3	0.535802721	0.339336
14/06/2019 13:00	US-NR1	ENF	7.766103809	2.7738	0.190093209	387.32	42.31	12.82	0.871630947	25.7	21.41724798	134.84	1.399824617	0.435162285	NaN	197.5308671	590.5299179	1157.915475	60.79644097	0.792750929	238.84	0.509993977	0.411403667
15/06/2019 12:30	US-NR1	ENF	13.97318268	2.5976	0.126131477	931.84	79.47	8.41	0.229587389	24.2	207.5051291	393.01	1.393904656	0.436546538	NaN	474.6912279	771.2327688	1513.964238	60.12590824	0.574625828	124.01	0.509412805	0.393588667
16/06/2019 12:30	US-NR1	ENF	16.00989536	2.4864	0.141372921	1034.82	66.59	12.56	0.496058001	23	117.5404287	452.72	1.387858737	0.437960242	NaN	526.5363542	947.7796821	1862.703995	59.44110886	0.550171901	188.83	0.508819267	0.326500667
18/06/2019 13:30	US-NR1	ENF	12.81961144	1.3489	0.160253103	552.33	80.84	7.37	0.199274552	22.4	398.9855889	230.94	1.375514987	0.440846557	NaN	280.3668293	582.7811112	1148.094059	58.04297679	0.421087533	57.15	0.507607462	0.53701125
24/06/2019 13:00	US-NR1	ENF	12.18488244	2.789	NaN	577.29	45.06	9.68	0.67074528	22	206.4366085	220.89	1.346917871	0.46468692	NaN	289.063343	985.7239134	1968.594676	58.65215621	0.991515707	129.72	0.500724667	0.342606
25/06/2019 13:00	US-NR1	ENF	12.43955621	3.1301	NaN	1060.23	30.25	15.52	1.2604635	20.4	233.6989961	484.27	1.343354946	0.471159558	NaN	529.0919216	874.4805773	1752.343033	59.51378172	0.323550436	158.42	0.499035041	0.349690833
30/06/2019 13:00	US-NR1	ENF	2.205126711	3.0482	NaN	89.61	64.3	13.89	0.579313805	13.8	35.71673728	12.47	1.307107426	0.483901255	NaN	43.76559829	387.5460298	793.4999425	60.95183363	0.803520262	58.89	0.488400829	0.391482333
21/07/2019 13:00	US-NR1	ENF	11.53354325	3.0366	NaN	582.34	79.25	14.16	0.342805602	6.4	17.13886243	221.36	0.984651361	0.371543079	NaN	236.2655141	609.5755305	1502.46309	36.87327193	0.377154761	197.35	0.405717474	0.333465
22/07/2019 12:30	US-NR1	ENF	13.60676724	3.4009	NaN	227.58	92.59	12.94	0.112860422	10.8	NaN	81.46	0.959672619	0.359142235	NaN	90.98591795	736.8318281	1843.012536	36.57578205	0.806191212	229.7	0.399797513	0.30699275
09/08/2018 12:30	US-PFa	MF	9.57885384	2.2747	0.563817127	525.5	25.60552447	23.918335	2.299255807	NaN	NaN	NaN	3.424479167	0.552769016	-0.011931484	410.3187934	1022.869189	1310.000339	126.0728122	1.998061704	-9.552775	0.780815972	0.349581417
13/08/2018 13:00	US-PFa	MF	2.133048075	2.3232	0.466492527	1472	21.71258893	27.43451	2.984337785	10.7	NaN	NaN	3.323958333	0.763899378	-0.067208064	1144.428889	1292.51067	1662.467389	116.5714217	0.497462386	135.9016	0.777465278	0.373409833
02/09/2018 13:30	US-PFa	MF	10.56213263	1.5818	0.503370315	652.5	33.48657421	21.14241	1.724982596	15.95	NaN	NaN	2.307433036	0.752044524	-0.031474994	458.0906836	761.9984322	1085.383298	75.09082433	NaN	NaN	0.702054688	0.2779635
18/09/2018 13:30	US-PFa	MF	14.23949523	1.3795	0.531142426	249	22.95275564	19.076415	1.75257098	NaN	NaN	NaN	2.55527078	0.667027137	NaN	184.2281935	307.3183165	415.3667219	67.08471981	NaN	-5.32836975	0.739872263	0.68823375
23/09/2018 13:30	US-PFa	MF	14.62724001	1.555	0.514889654	989.5	20.6812531	18.272265	1.714130654	NaN	NaN	NaN	2.148701903	0.640705557	-0.013487159	679.955019	703.6647448	1024.00342	46.90242814	NaN	NaN	0.687170307	0.33333725
02/06/2019 13:00	US-PFa	MF	13.06090822	2.2522	NaN	1777	10.92343398	13.44632	1.403399594	NaN	340.6950264	NaN	2.630602324	0.619362602	-0.093315453	1261.603136	1344.255257	1893.417609	127.8116695	0.352333472	149.8692	0.709962372	0.3362385
07/06/2019 13:00	US-PFa	MF	12.38199024	2.5697	NaN	1462	11.87528105	27.19199	3.310903303	NaN	296.0068475	NaN	2.941105531	0.776678942	-0.048245822	1082.708539	1394.248517	1882.677802	133.7838381	0.56794616	236.6877	0.740566716	0.355787833
14/06/2019 12:30	US-PFa	MF	15.35101694	1.7445	0.475059798	454.5	37.08408461	13.01532	0.963690446	NaN	279.1838856	NaN	3.097623698	0.953162799	-0.031832476	338.0950342	429.4119224	577.256981	119.7803136	0.731367356	71.83346	0.743883464	0.78793325
18/06/2019 13:00	US-PFa	MF	21.81528084	2.62	NaN	644	25.44118655	16.84717	1.469261022	NaN	243.0806974	NaN	2.940559896	0.838224068	NaN	476.228776	448.2616418	606.1802895	125.9659127	0.508103866	136.8718	0.739485677	0.436465667
08/07/2019 13:30	US-PFa	MF	14.33238213	1.14	NaN	1424.5	20.31122896	25.948915	2.778579336	NaN	289.6950499	NaN	2.874726563	0.438677942	-0.038183412	1054.998055	1181.120488	1594.795486	143.5294194	0.611631245	219.55725	0.740609375	0.33734925
09/07/2019 13:00	US-PFa	MF	19.76752114	1.5481	NaN	1446	21.51604782	25.32266	2.634040333	NaN	223.8979602	NaN	2.860651042	0.449075753	NaN	1067.735438	618.4336078	837.5248825	143.183922	0.654127466	262.1928	0.73840625	0.320766667
10/07/2019 12:30	US-PFa	MF	19.62587564	3.4834	NaN	1110	24.93366982	22.755325	2.15204323	NaN	176.3757654	NaN	2.846575521	0.459473564	NaN	817.1854688	802.1258961	1089.54427	142.8384245	0.718201565	256.0079	0.736203125	0.560606417
12/07/2019 12:00	US-PFa	MF	10.79566314	2.0839	NaN	730	32.49386921	23.84332	2.069685755	NaN	119.9643733	NaN	2.818125	0.480490416	-0.062154031	534.1775	1351.438301	1846.857944	142.1400784	1.138956048	214.3681	0.73175	0.285852
20/07/2019 13:00	US-PFa	MF	9.208813439	2.6052	NaN	400	38.32514683	17.58099	1.274492951	NaN	NaN	NaN	3.347439236	0.817565976	NaN	311.8472222	555.1139645	712.0332329	147.5043738	0.361996859	14.57197	0.779618056	0.870066833
21/07/2019 12:30	US-PFa	MF	17.41084194	1.722	NaN	1013.5	22.84412896	21.018495	1.985203274	NaN	289.4067383	NaN	3.458615451	0.876843937	-0.06130995	800.8937413	1290.825175	1633.489247	148.751785	0.626525757	165.3112	0.790225694	0.49366225
25/07/2019 13:00	US-PFa	MF	18.15649524	1.6826	NaN	1375	20.49074197	24.80618	2.585804787	NaN	191.4853596	NaN	3.69609375	0.829475117	-0.079822877	1117.211372	1491.533755	1835.694628	146.2418419	0.730264265	274.1599	0.812517361	0.384729
26/07/2019 12:30	US-PFa	MF	24.55576299	1.8495	0.462255371	1226.5	28.48052504	23.58917	2.159121891	NaN	144.8205031	NaN	3.702213542	0.749294088	NaN	997.0529384	1109.456969	1364.771037	143.8288685	0.685662627	296.46915	0.812925347	0.433107083
27/07/2019 12:30	US-PFa	MF	19.38531579	2.1226	0.467522716	1556.5	20.98656445	24.586915	2.535566809	NaN	177.3995113	NaN	3.708463542	0.66740708	-0.039896751	1265.966845	1388.912183	1707.660688	141.3645552	0.642956898	339.3045	0.813342014	0.615970333
30/07/2019 13:00	US-PFa	MF	11.79994925	2.5699	0.559462554	1647	18.1344001	18.92133	1.843765702	NaN	692.8696895	NaN	3.72734375	0.420040075	-0.089458993	1341.647344	1479.746296	1816.529627	133.9202755	0.468177315	146.2276	0.814600694	0.327180167
23/05/2018 12:30	US-Syv	MF	5.752597303	1.5298	0.582343912	1608.953	36.34889	24.37333	2.016004	25.476	NaN	584.2507	1.792224259	0.256674842	NaN	951.8332421	893.6467162	1510.596081	73.02431962	0.410231413	147.3237	0.591585486	0.443419833
29/05/2018 12:30	US-Syv	MF	15.384063	1.9686	0.571155472	1901.849	41.97667	28.31	2.3304082	27.06056	455.6454299	695.3019	2.51640935	0.432845869	-0.082065749	1352.5256	1386.416782	1949.504963	95.90145158	0.51156087	252.3739	0.711163504	0.257242583
04/06/2018 12:00	US-Syv	MF	16.971334	1.3772	NaN	1652.41	39.35555	18.57667	1.336047825	32.42388	334.209338	677.3465	2.91235119	0.731698902	NaN	1223.034212	1191.000709	1609.13036	96.07445988	0.393731007	196.1962	0.740151786	0.338356
06/06/2018 13:00	US-Syv	MF	24.64573434	1.6068	0.582343912	878.5726	80.12999	12.86111	0.301041692	29.91444	111.5874921	353.4236	2.968340774	0.748070762	-0.104341755	654.8416469	1305.95273	1752.140064	98.43344773	0.623224868	136.9676	0.745347222	0.777291167
07/06/2018 13:00	US-Syv	MF	15.1866186	2.2662	NaN	1670.412	49.00333	17.77111	1.066833086	29.30967	NaN	620.4221	2.958519345	0.715804654	NaN	1245.593748	1176.693503	1578.012855	100.6702983	0.436928349	139.6998	0.745680556	0.335154833
14/06/2018 12:00	US-Syv	MF	14.9958446	2.0436	0.582343912	1878.592	30.77667	23.40111	2.065310243	29.93467	NaN	695.5945	2.8609375	0.512690116	-0.095999224	1396.302641	1540.631992	2072.773373	114.1420718	0.478952182	220.6105	0.743270833	0.292448
17/06/2018 13:00	US-Syv	MF	18.95354605	2.2281	0.582343912	1890.016	63.48223	27.83777	1.426009638	34.41711	146.3501286	702.2049	2.742122396	0.479650589	NaN	1379.523007	464.8625465	636.8851019	114.5796829	0.638507627	386.596	0.729900174	0.2842075
25/06/2018 12:00	US-Syv	MF	20.41837321	1.0033	0.582343912	1906.477	49.15556	22.53667	1.437929756	25.48056	NaN	715.4672	2.65375	0.697562474	-0.077600214	1369.327105	1301.142929	1811.54602	120.621142	0.504459974	271.064	0.71825	0.340728
29/06/2018 12:30	US-Syv	MF	23.5899958	1.7346	0.582343912	1752.682	68.46334	26.60667	1.143915897	23.24199	395.1908761	669.5729	2.72203125	0.956426041	-0.011870754	1269.34951	1262.066539	1742.625879	126.1775934	0.530747837	174.3694	0.724232639	0.382284667
03/07/2018 13:00	US-Syv	MF	18.8212579	1.9791	0.564812015	1270.371	47.07222	26.02	1.853055311	27.75889	304.5324948	478.2585	3.1140625	0.561748116	NaN	977.0829174	995.3393892	1294.107463	142.4834661	NaN	202.1568	0.769131944	0.662776542
08/07/2018 13:00	US-Syv	MF	15.95208403	2.2998	0.564847865	1883.923	48.86333	28.08555	2.026577806	23.161	274.524994	701.7472	3.437065972	0.246128582	-0.087677094	1520.946204	1524.289804	1888.064557	153.4282669	0.564615319	310.3748	0.807329282	0.378011
09/07/2018 12:30	US-Syv	MF	22.223454	3.2301	NaN	1890.33	57.25777	25.34444	1.436394535	22.27199	NaN	721.9281	3.377907986	0.314676674	-0.102815438	1515.450103	1578.695082	1969.220015	148.6271109	NaN	NaN	0.801685475	0.293441917
26/07/2018 12:30	US-Syv	MF	18.9290876	0.6269	0.582343912	1083.721	75.71333	16.17111	0.457990687	22.71101	117.4572948	435.3923	3.228710938	0.52130361	-0.096114519	857.712961	889.6337146	1124.052897	119.0409929	0.606535019	198.167	0.791451823	0.697012417
28/07/2018 13:30	US-Syv	MF	19.1070825	1.7124	0.582343912	1537.911	38.76889	22.57778	1.736101011	21.80934	NaN	582.1196	3.163632813	0.522444714	NaN	1200.501737	1101.477849	1411.055768	119.3593469	0.59430056	199.202	0.780605469	0.37996675
09/08/2018 13:00	US-Syv	MF	17.8259831	2.337	0.580551334	1741	41.66667	25.64889	1.99692203	16.631	NaN	643.4863	NaN	NaN	-0.042699498	NaN	NaN	1567.421161	117.4132547	0.743376149	361.6128	NaN	0.3370965
14/08/2018 13:00	US-Syv	MF	17.9116527	1.1737	0.582343912	1385.293	67.11222	26.00666	1.150506009	11.09544	NaN	529.3211	NaN	NaN	NaN	NaN	NaN	588.202906	105.4413219	0.595091738	173.5519	NaN	0.6634425
26/08/2018 12:30	US-Syv	MF	20.3313136	1.6661	NaN	1505.494	51.40334	24.84667	1.584373491	12.74989	129.8302663	560.7175	2.729651538	0.733144444	NaN	1107.268434	923.2771576	1255.330847	79.69528638	0.671151999	338.9727	0.735485119	0.425577333
27/08/2018 12:30	US-Syv	MF	13.622589	1.1578	0.582343912	661.3145	78.34999	24.11111	0.674780895	21.33178	293.882358	264.916	2.707211062	0.724528737	NaN	488.1819703	532.382336	721.1904162	78.75730412	0.849088569	108.9068	0.738199405	0.8016955
27/07/2019 13:00	US-Syv	MF	23.75456573	0.9477	0.581526293	1300.339	52.64	23.80133	1.448276376	NaN	104.9347465	489.2486	1.485026042	1.048941729	-0.014489003	638.1650683	820.7872145	1672.45385	137.1724698	0.681698011	332.7323	0.490768229	0.410823167
28/07/2019 12:30	US-Syv	MF	26.15606921	1.8182	NaN	1125.285	55.72566	25.06067	1.462410874	NaN	164.7770491	433.49	1.426888021	0.991946449	NaN	539.5140837	192.1848531	400.8472419	135.3686423	0.809158697	253.5257	0.479446615	0.78472625
29/05/2018 13:00	US-UMB	DBF	13.15718238	2.6645	NaN	1875	54.753	23.634	1.369484177	9.5492	NaN	685.24	3.47375	NaN	0.068788356	NaN	NaN	2020.372761	NaN	0.329943473	124.91	NaN	NaN
04/06/2018 13:00	US-UMB	DBF	27.76671962	0.9478	0.541636029	1334.4	61.193	15.667	0.708079076	11.915	317.3715787	512.91	3.76859375	NaN	NaN	NaN	NaN	1050.791084	NaN	0.357386916	114.01	NaN	0.058707306
14/06/2018 13:00	US-UMB	DBF	24.45137299	3.0254	NaN	1953.1	46.161	22.4	1.509742724	10.091	213.8071232	701.68	4.18109375	NaN	0.073653441	NaN	NaN	2064.506147	NaN	0.554550502	309.6	NaN	NaN
23/06/2018 12:00	US-UMB	DBF	24.40923404	2.0697	0.541636029	706.67	92.52513631	17.828	0.156945875	8.71	265.3963094	260.66	4.2	NaN	NaN	NaN	NaN	1061.010476	NaN	NaN	75.467	NaN	0.39428
26/06/2018 12:30	US-UMB	DBF	27.69105154	3.6864	0.541636029	1960.2	46.526	22.046	1.466821763	7.635	135.5889574	717.96	4.2	NaN	NaN	NaN	NaN	1482.532588	NaN	0.592096535	374.88	NaN	0.076043
01/07/2018 12:30	US-UMB	DBF	18.2757687	0.7345	0.541636029	1921	49.985	32.214	2.524886356	5.7654	389.6579828	699.66	4.2	NaN	0.005159414	NaN	NaN	1846.471439	NaN	0.799427749	343.1	NaN	0.049621833
02/07/2018 12:30	US-UMB	DBF	25.07820836	2.2914	0.541636029	1949.1	55.287	23.329	1.328109834	5.7433	221.2133457	715.99	4.2	NaN	0.064276188	NaN	NaN	1967.298624	NaN	0.581474846	318.09	NaN	0.050079958
06/07/2018 12:30	US-UMB	DBF	21.12450518	1.9699	0.541636029	1940.2	39.959	20.922	1.53503561	5.165	354.8858662	707.35	4.2	NaN	0.044680534	NaN	NaN	1960.479374	NaN	0.418986229	243.1	NaN	NaN
07/07/2018 12:30	US-UMB	DBF	14.20039762	1.3314	0.541636029	1923.7	33.353	25.003	2.193672923	4.8317	NaN	692.75	4.2	NaN	0.056403432	NaN	NaN	1975.483194	NaN	0.561993634	155.38	NaN	NaN
09/07/2018 11:30	US-UMB	DBF	28.5512125	1.0083	0.541636029	1517.7	63.715	25.094	1.200953244	4.465	232.6640008	556.03	4.2	NaN	0.066183742	NaN	NaN	1610.631844	NaN	0.558850467	225.77	NaN	0.154642917
23/07/2018 12:30	US-UMB	DBF	24.08008535	1.6738	0.541636029	899.1	92.755	21.222	0.188752458	8.4269	282.8808653	335.35	4.2	NaN	0.070711679	NaN	NaN	1797.879405	NaN	0.602747837	114.02	NaN	0.297166417
28/07/2018 12:30	US-UMB	DBF	30.55739204	2.0709	0.541636029	1904	55.111	22.06	1.232405494	5.5967	166.0666231	714.5	4.2	NaN	NaN	NaN	NaN	1409.618322	NaN	0.542190527	307.91	NaN	NaN
29/07/2018 12:00	US-UMB	DBF	32.57932507	2.1113	0.541636029	1787.2	52.024	24.07	1.491533548	6.7967	82.86382848	645.32	4.2	NaN	0.067446178	NaN	NaN	1833.563737	NaN	0.693290026	437.57	NaN	NaN
30/07/2018 12:00	US-UMB	DBF	28.32770493	1.7439	0.541636029	1866	43.832	25.114	1.861302127	6.6467	235.5790774	679.82	4.2	NaN	0.070317662	NaN	NaN	1799.713502	NaN	0.566152568	313.49	NaN	NaN
03/08/2018 12:00	US-UMB	DBF	25.99833638	1.6188	0.541636029	1869.4	58.867	20.943	1.053014619	4.6333	464.2798216	701.09	4.2	NaN	0.094131882	NaN	NaN	1336.910373	NaN	0.39219661	187.67	NaN	0.21704
07/08/2018 12:30	US-UMB	DBF	31.24381482	2.3975	0.541636029	1634.3	72.119	19.958	0.670737763	6.69	225.8217231	597.05	4.2	NaN	0.06911604	NaN	NaN	1748.676373	NaN	0.441585189	203.69	NaN	NaN
08/08/2018 12:30	US-UMB	DBF	28.85979985	1.6488	0.541636029	1727.8	59.68	23.863	1.237676639	6.27	349.9588048	651.02	4.2	NaN	0.083984903	NaN	NaN	1776.033637	NaN	0.42416356	180.91	NaN	NaN
09/08/2018 12:00	US-UMB	DBF	20.65297667	0.9044	NaN	1644.9	66.204	24.44	1.074789327	5.5667	165.3682802	591.79	4.2	NaN	0.060458763	NaN	NaN	1558.694768	NaN	0.492321222	302.3	NaN	0.05758
06/09/2018 11:30	US-UMB	DBF	19.89481344	1.0608	0.541636029	1542.2	48.179	18.18	1.112978515	10.406	328.3539915	564.74	4.2	NaN	0.063824645	NaN	NaN	1482.085043	NaN	0.657015997	216.04	NaN	0.010095694
07/09/2018 13:00	US-UMB	DBF	26.74992345	1.1303	0.541636029	1371	39.085	18.914	1.371277027	9.6208	145.0913062	489.89	4.2	NaN	0.025075173	NaN	NaN	1597.905772	NaN	0.718291447	269.23	NaN	NaN
11/09/2018 12:00	US-UMB	DBF	20.22337682	0.615	0.541636029	1523.4	55.679	21.83	1.199475192	6.9942	198.3702734	555.73	4.2	NaN	0.062697264	NaN	NaN	774.2160246	NaN	0.701696067	289.19	NaN	0.586728
13/09/2018 13:00	US-UMB	DBF	23.02474245	1.4126	NaN	1522.5	65.973	23.08	0.995272798	7.1067	123.1840068	559.08	4.2	NaN	0.059178732	NaN	NaN	1612.877096	NaN	0.621657216	339.86	NaN	0.004791667
14/09/2018 12:30	US-UMB	DBF	29.47846253	1.1807	0.541636029	1571.4	62.841	23.774	1.134419454	6.4333	90.43683075	577.77	4.2	NaN	-0.000986403	NaN	NaN	1113.701327	NaN	0.686642146	382.7	NaN	NaN
04/10/2018 13:00	US-UMB	DBF	17.39286019	0.2445	NaN	948.77	51.157	7.7064	0.520089224	12.428	119.5347894	341.38	NaN	NaN	0.02277302	NaN	NaN	1355.687822	NaN	0.498368952	163.47	NaN	0.1880045
08/06/2019 12:30	US-UMB	DBF	9.587472275	1.294	0.541636029	1925.8	29.214	25.408	2.388039097	9.35	NaN	734.9	3.272261905	NaN	0.101475164	NaN	NaN	1946.23922	NaN	0.347603704	154.27	NaN	NaN
11/06/2019 13:00	US-UMB	DBF	16.63685173	1.4436	0.541636029	1924.6	29.504	20.318	1.735004888	13.483	716.4071392	741.89	3.600238095	NaN	0.001218807	NaN	NaN	1822.103964	NaN	0.398682404	200.31	NaN	0.020313167
13/06/2019 12:30	US-UMB	DBF	14.21095385	1.3232	0.541636029	567.51	86.009	13.224	0.217180976	16.039	132.3119378	218.82	3.662039931	NaN	NaN	NaN	NaN	211.0536337	NaN	0.759656498	105.71	NaN	0.787034444
29/06/2019 12:30	US-UMB	DBF	19.25010445	1.5705	NaN	1933.8	38.819	26.686	2.22981365	11.409	363.6102481	735.01	3.788706597	NaN	-0.027025911	NaN	NaN	1900.194508	NaN	0.675350829	318.59	NaN	0.000470799
08/07/2019 13:00	US-UMB	DBF	33.79126619	2.1657	NaN	1790.5	44.361	22.619	1.581588298	9.7033	92.63099803	686.39	3.860121528	NaN	0.013620184	NaN	NaN	1851.637979	NaN	0.734498373	449.3	NaN	NaN
09/07/2019 12:30	US-UMB	DBF	29.94722286	1.6785	NaN	1878.9	50.651	25.055	1.629467342	9.1692	166.4901334	717.54	3.867873264	NaN	0.010548758	NaN	NaN	1888.154303	NaN	0.622125173	396.02	NaN	NaN
24/07/2019 13:00	US-UMB	DBF	33.91461741	1.3638	0.541636029	1165.7	57.761	21.079	1.090609642	9.855	120.3887183	458.87	3.986788194	NaN	0.063168032	NaN	NaN	1864.174518	NaN	0.785384532	247.36	NaN	NaN
25/07/2019 12:30	US-UMB	DBF	30.44616917	2.1617	0.541636029	1718.2	53.536	25.844	1.609518042	9.19	187.9663192	664.72	3.994539931	NaN	NaN	NaN	NaN	1769.56979	NaN	0.749173966	337.84	NaN	NaN
30/07/2019 12:30	US-UMB	DBF	23.19605741	2.0734	NaN	989.44	70.222	16.273	0.565289624	10.985	220.2783198	408.2	4.03	NaN	0.071967222	NaN	NaN	1831.417528	NaN	0.533066061	150.25	NaN	NaN
31/07/2019 12:30	US-UMB	DBF	15.12549123	1.8742	0.541636029	1854.2	45.017	21.033	1.415562829	10.242	671.9874206	712.57	4.03	NaN	0.039791261	NaN	NaN	1784.648922	NaN	0.69287224	236.02	NaN	NaN
23/05/2018 12:00	US-UMd	DBF	15.07705628	0.9652	0.542030039	1866.295163	26.169	24.362	2.336806889	12.187	155.9538963	674.22	2.955	NaN	0.011155742	NaN	NaN	1678.240546	NaN	0.535648354	458.44	NaN	0.003635
25/05/2018 13:00	US-UMd	DBF	13.9190743	0.9462	0.542030039	1873.605914	53.007	26.69	1.713127521	12.047	NaN	684.53	3.424583333	NaN	0.012317797	NaN	NaN	1670.926472	NaN	0.239792952	92.374	NaN	0.058347667
29/05/2018 13:30	US-UMd	DBF	18.01322178	1.7113	NaN	1877.083673	51.397	24.177	1.520978838	9.5383	695.8732022	675.53	4.349375	NaN	0.061286009	NaN	NaN	1895.56305	NaN	0.407803937	160.74	NaN	NaN
13/06/2018 12:00	US-UMd	DBF	29.20544182	2.3085	0.542030039	1115.546703	71.924	16.017	0.524147058	10.662	80.62842623	425.39	4.6403125	NaN	0.07740205	NaN	NaN	1359.304664	NaN	0.729382426	212.34	NaN	0.7678
19/06/2018 11:30	US-UMd	DBF	34.37456446	2.1702	0.542030039	1996.70775	54.324	20.321	1.124363159	10.711	100.6347936	735.17	4.66	NaN	0.03866232	NaN	NaN	1848.204901	NaN	0.514100967	367.32	NaN	0.01236175
20/06/2018 13:00	US-UMd	DBF	27.71519881	1.6449	0.542030039	2023.003903	46.019	23.567	1.627105523	9.6208	164.1702761	734.55	4.66	NaN	0.07751059	NaN	NaN	1985.703074	NaN	0.541903872	382.66	NaN	NaN
21/06/2018 12:30	US-UMd	DBF	23.86642342	2.6696	0.542030039	2009.572877	46.287	18.617	1.186402076	8.025	306.2354413	733.11	4.66	NaN	0.065091198	NaN	NaN	1995.800364	NaN	0.43804653	218.41	NaN	NaN
26/06/2018 13:00	US-UMd	DBF	26.9541165	1.4329	0.542030039	2004.603135	43.429	23.3	1.677322236	7.5933	347.1569954	722.89	4.66	NaN	NaN	NaN	NaN	1503.162509	NaN	0.488549927	241.5	NaN	0.075732
27/06/2018 12:30	US-UMd	DBF	26.7596132	1.0488	NaN	822.98358	62.734	20.523	0.929115065	9.5417	123.3184251	302.63	4.66	NaN	NaN	NaN	NaN	1418.035218	NaN	0.662877965	183.01	NaN	0.216752736
07/07/2018 12:30	US-UMd	DBF	19.06847029	2.4247	0.542030039	1975.599781	32.479	25.421	2.279690695	4.8317	689.4377072	707.56	4.66	NaN	0.054730797	NaN	NaN	1975.71638	NaN	0.3679511	184.2	NaN	NaN
08/07/2018 12:30	US-UMd	DBF	16.69880086	1.409	NaN	1991.402569	30.129	27.163	2.620541158	4.5717	NaN	714.99	4.66	NaN	0.016586719	NaN	NaN	1893.393783	NaN	0.33272055	159.27	NaN	0.0343125
24/07/2018 12:30	US-UMd	DBF	22.38159088	1.2761	NaN	1220.80031	65.612	24.522	1.099117079	7.9157	111.9919778	443.66	4.66	NaN	0.058554825	NaN	NaN	1764.504468	NaN	0.661573377	294.42	NaN	0.552761611
26/07/2018 13:30	US-UMd	DBF	23.97257632	1.7107	0.542030039	1418.201582	59.34	21.373	1.069383657	6.3892	297.9717682	517.84	4.66	NaN	0.005656401	NaN	NaN	1709.033189	NaN	0.49000609	177	NaN	0.068361
28/07/2018 12:30	US-UMd	DBF	21.73449286	1.1989	0.542030039	1358.168803	55.924	21.526	1.170387981	5.5967	249.9231357	479.4	4.66	NaN	NaN	NaN	NaN	1440.492344	NaN	0.537806684	203.42	NaN	NaN
29/07/2018 12:30	US-UMd	DBF	30.88740379	1.7911	0.542030039	1884.361905	48.021	25.044	1.715158206	6.9367	202.82485	688.38	4.66	NaN	0.067792071	NaN	NaN	1910.028999	NaN	0.455698538	296.4	NaN	NaN
30/07/2018 12:00	US-UMd	DBF	14.01479655	-0.1236	0.542030039	1980.558565	39.727	26.003	2.108050478	6.6467	NaN	726.29	4.66	NaN	0.068167716	NaN	NaN	1803.152996	NaN	NaN	40.978	NaN	NaN
31/07/2018 13:30	US-UMd	DBF	15.86870805	0.7123	0.542030039	1825.713302	41.081	27.381	2.238828134	5.97	543.6614136	661.84	4.66	NaN	0.010367144	NaN	NaN	1559.216206	NaN	NaN	227.5	NaN	0.085247
08/08/2018 12:30	US-UMd	DBF	19.6733657	0.8234	0.542030039	1551.936049	55.669	24.162	1.386015464	6.27	NaN	576.79	4.66	NaN	0.084199431	NaN	NaN	1770.551045	NaN	0.082377241	29.115	NaN	NaN
09/08/2018 12:30	US-UMd	DBF	21.57462089	1.6714	NaN	1867.342839	52.025	25.204	1.598534952	5.5067	182.8856791	674.49	4.66	NaN	0.05548647	NaN	NaN	1653.948962	NaN	0.51102774	359.6	NaN	NaN
10/08/2018 12:00	US-UMd	DBF	19.14716075	1.5151	0.542030039	1813.461087	50.736	25.93	1.715417601	4.6383	225.6149506	650.95	4.66	NaN	0.078136835	NaN	NaN	1761.320463	NaN	0.483487065	381.07	NaN	NaN
14/08/2018 12:30	US-UMd	DBF	8.34160978	0.782	0.542030039	1778.638965	40.1	30.34	2.711802585	4.1667	NaN	643.77	4.66	NaN	0.053192128	NaN	NaN	1629.660819	NaN	0.115796904	33.466	NaN	NaN
18/08/2018 13:00	US-UMd	DBF	10.73240118	0.7899	0.542030039	1545.168576	60.389	23.572	1.19433015	4.4444	NaN	562.57	4.66	NaN	0.037455576	NaN	NaN	1582.92064	NaN	0.191375012	88.665	NaN	0.011311778
19/08/2018 12:30	US-UMd	DBF	14.52124365	1.2078	0.542030039	1786.506426	62.861	25.327	1.246770016	4.7037	NaN	664.97	4.66	NaN	0.055872662	NaN	NaN	1617.822281	NaN	0.223045236	115.33	NaN	0.256522167
23/08/2018 13:00	US-UMd	DBF	16.47293067	1.1513	0.542030039	1580.654862	38.028	25.762	2.136080494	8.6733	461.3043009	568.31	4.66	NaN	NaN	NaN	NaN	1592.529941	NaN	0.451187059	215.32	NaN	NaN
11/09/2018 12:00	US-UMd	DBF	21.92016494	0.6401	0.542030039	1593.918699	52.921	21.898	1.27953626	6.9942	424.8668742	565.44	4.66	NaN	0.063965743	NaN	NaN	746.212211	NaN	0.584887144	172.84	NaN	0.59202
12/09/2018 13:30	US-UMd	DBF	27.01383445	1.2484	0.542030039	1513.871223	45.574	26.161	1.921818097	5.9825	110.3331072	529.52	4.66	NaN	0.058994452	NaN	NaN	1410.334965	NaN	0.769473854	382.29	NaN	0.000269375
14/09/2018 13:00	US-UMd	DBF	30.5507388	0.9887	0.542030039	1618.168986	57.433	24.289	1.341266179	6.3883	117.3413553	579.39	4.66	NaN	-0.002082503	NaN	NaN	1184.798719	NaN	0.585340959	332.62	NaN	NaN
17/09/2018 12:00	US-UMd	DBF	22.04239769	1.3962	0.542030039	1554.7044	54.971	28.083	1.78425617	6.7567	601.5953455	550.38	NaN	NaN	0.061021099	NaN	NaN	1420.52995	NaN	0.617685161	166.88	NaN	0.000133333
25/09/2018 13:00	US-UMd	DBF	31.0190416	0.2111	0.542030039	1443.245049	65.154	23.359	1.036948717	10.245	NaN	585.28	NaN	NaN	NaN	NaN	NaN	533.3031219	NaN	NaN	NaN	NaN	NaN
27/09/2018 12:30	US-UMd	DBF	25.63466154	0.8333	0.542030039	953.1851475	50.741	16.336	0.938955209	10.282	136.1613357	321.21	NaN	NaN	0.009082507	NaN	NaN	1011.3604	NaN	0.597142857	171.38	NaN	0.213154583
06/06/2019 13:30	US-UMd	DBF	12.27681959	0.8709	0.542030039	1890.7	31.756	21.22	1.777723469	10.143	653.5942053	681.03	3.573046875	NaN	0.077062313	NaN	NaN	1945.135956	NaN	0.358131246	204.98	NaN	0.000565625
07/06/2019 13:00	US-UMd	DBF	11.0261733	2.1718	0.542030039	1922.3	30.17	25.094	2.311218548	9.7558	NaN	689.42	3.65015625	NaN	0.068376681	NaN	NaN	1956.715902	NaN	0.450806515	230.29	NaN	NaN
08/06/2019 12:30	US-UMd	DBF	10.44031441	1.3928	0.542030039	1950.9	28.425	25.812	2.474565511	9.35	NaN	702.09	3.727265625	NaN	0.104517851	NaN	NaN	1946.843105	NaN	0.35905107	170.42	NaN	NaN
11/06/2019 13:30	US-UMd	DBF	16.91082795	2.3438	0.542030039	1899.4	29.634	19.997	1.696993684	13.455	363.7133252	691.74	3.966796875	NaN	0.001115498	NaN	NaN	1728.152748	NaN	0.439760211	247.95	NaN	0.02604575
21/06/2019 12:00	US-UMd	DBF	16.87521622	1.4483	NaN	1977.9	48.443	19.012	1.167901218	10.529	535.6710746	724.81	4.145106383	NaN	0.040621138	NaN	NaN	1919.970506	NaN	0.382601316	180.32	NaN	0.001226667
02/07/2019 13:30	US-UMd	DBF	28.21613499	1.7284	NaN	1679	58.242	24.172	1.30637123	14.948	54.11160356	618.06	4.229840426	NaN	0.004934667	NaN	NaN	1647.273594	NaN	0.771776209	490.95	NaN	0.09910375
03/07/2019 13:00	US-UMd	DBF	18.53283189	1.6877	NaN	1948.6	40.802	27.592	2.27799511	13.321	161.0533536	711	4.237340426	NaN	0.024004536	NaN	NaN	1966.060219	NaN	0.6843982	491.35	NaN	NaN
09/07/2019 13:00	US-UMd	DBF	21.55925416	0.9057	NaN	1854.6	46.413	25.649	1.834453385	9.1458	475.544118	684.54	4.283297872	NaN	0.01039112	NaN	NaN	1920.302899	NaN	0.642923964	247.41	NaN	NaN
13/07/2019 11:30	US-UMd	DBF	31.98865849	1.7718	NaN	1619.6	52.251	23.476	1.431209126	12.09	148.742733	618.72	4.313457447	NaN	0.00448641	NaN	NaN	1448.774167	NaN	0.51462228	288.77	NaN	NaN
14/07/2019 13:00	US-UMd	DBF	22.3573551	1.4352	NaN	1944.8	39.736	24.495	1.922992851	11.04	158.2599251	709.97	4.321595745	NaN	0.013151308	NaN	NaN	2026.819825	NaN	0.5575709	396.55	NaN	NaN
19/07/2019 13:00	US-UMd	DBF	20.47282822	1.4985	NaN	1934.1	64.555	28.83	1.468184364	11.487	206.3504483	721.59	4.359893617	NaN	0.015189873	NaN	NaN	1665.503781	NaN	0.694992928	368.52	NaN	0.499589667
22/07/2019 12:00	US-UMd	DBF	25.17645316	1.2392	NaN	1909.6	39.079	21.926	1.658636659	11.697	122.8088872	700.79	4.382553191	NaN	-0.003376389	NaN	NaN	1611.453202	NaN	0.574684164	398.94	NaN	0.097908
25/07/2019 13:00	US-UMd	DBF	32.47684172	1.3363	0.542030039	1745.5	50.835	26.658	1.788859761	9.1567	104.20093	653.92	4.405851064	NaN	-0.333333333	NaN	NaN	1819.088305	NaN	0.633669325	421.2	NaN	NaN
31/07/2019 12:30	US-UMd	DBF	19.27711515	2.3999	0.542030039	1937.4	45.471	21.306	1.428136734	10.242	385.1011155	701.94	4.44	NaN	0.034136611	NaN	NaN	1781.419021	NaN	0.515759874	236.61	NaN	NaN
08/08/2018 12:30	US-Vcm	ENF	5.513840924	0.8234	0.130889446	2054.484	30.14852	18.23689	1.50571745	NaN	NaN	807.88007	1.437138605	0.403284063	-0.047743802	1102.508659	975.0126334	1816.899884	35.97644863	0.680113384	219.9088	0.53663531	0.19760925
10/08/2018 12:00	US-Vcm	ENF	7.623566299	1.5151	0.167374031	1830.424	46.59434	15.00919	0.933234527	NaN	NaN	680.44495	1.475510204	0.385493476	NaN	1000.476138	309.32737	565.9307806	36.62229938	0.525956422	280.25032	0.546581633	0.701704
14/08/2018 12:30	US-Vcm	ENF	3.94719422	0.782	0.17619546	1087.571	45.07635	16.84971	1.082507642	NaN	NaN	357.81381	1.553465136	0.349350495	-0.059141138	616.4225961	958.2265367	1690.624905	37.93439617	0.541616302	137.95355	0.566788372	0.213550583
18/08/2018 13:00	US-Vcm	ENF	5.448096559	0.7899	0.217636554	1506.545	50.8423	16.31071	0.935480802	NaN	NaN	586.41367	1.547045068	0.326178795	NaN	856.4006936	463.981918	816.2179734	37.68426087	0.777461001	270.45826	0.568453444	0.310046833
19/08/2018 12:30	US-Vcm	ENF	8.345666534	1.2078	0.190443492	1913.523	24.48312	16.59715	1.464158669	NaN	NaN	711.53556	1.52556335	0.323598057	-0.061026607	1080.148953	1004.951202	1780.307459	37.25455327	0.632287907	305.74173	0.564481824	0.22417675
23/08/2018 13:00	US-Vcm	ENF	7.529335506	1.1513	0.216693927	1337.991	52.28986	14.2999	0.795549618	NaN	NaN	487.00707	1.43735119	0.313000558	-0.05562028	733.4503152	801.635462	1462.377221	35.49000932	0.538996242	201.91411	0.548172832	0.1974355
11/09/2018 12:00	US-Vcm	ENF	8.504328174	0.6401	0.142779617	2029.781	28.70383	16.34433	1.359756916	NaN	NaN	756.636	1.256632653	0.316300034	NaN	1066.049266	624.2715242	1188.626566	25.49832819	0.506650811	278.53294	0.525204082	0.344136
14/09/2018 13:00	US-Vcm	ENF	9.134664544	0.9887	0.090566871	1777.847	19.29023	16.84248	1.58998801	NaN	NaN	610.33502	1.209300595	0.350013991	-0.057177923	930.1458155	872.9823143	1668.586756	22.44238415	0.496600319	135.68248	0.52318665	0.237320667
25/09/2018 13:00	US-Vcm	ENF	5.919801467	0.2111	0.100253324	1918.517	29.27556	13.60632	1.126207942	NaN	NaN	708.02675	1.040888251	0.194616603	-0.04953898	970.4291169	491.6880931	972.0565354	17.87400736	0.388356737	172.48019	0.505822527	0.257123167
24/05/2019 12:30	US-Vcm	ENF	5.626070653	-0.1975	0.184863365	2090.995	21.4884	6.66944	0.777352563	NaN	NaN	767.96763	0.808674532	0.204226392	-0.042082116	732.8741148	688.5402785	1964.504204	26.35032539	0.431447262	181.00378	0.350490611	0.115162667
06/06/2019 13:30	US-Vcm	ENF	6.188196982	0.8709	0.143719611	1653.152	32.3517	14.51963	1.144534717	NaN	NaN	594.97697	1.049043367	0.227850357	-0.047666571	704.1196618	783.4213601	1839.338764	25.72875474	0.473861823	207.94168	0.425925542	0.156937
07/06/2019 13:00	US-Vcm	ENF	10.14705546	2.1718	0.107191454	2065.918	29.8354	14.98607	1.22422189	NaN	NaN	769.1204	1.07135771	0.248118021	NaN	895.1590341	560.9423547	1294.586619	26.22850625	0.494668736	205.19108	0.433298434	0.165631333
08/06/2019 12:30	US-Vcm	ENF	7.885993278	2.0105	0.109129975	2081.768	20.5918	13.7713	1.278449486	NaN	NaN	762.7146	1.093672052	0.268385684	-0.054731612	917.3754646	863.0569788	1958.504963	26.72825775	0.489943944	213.05281	0.440671326	0.222513667
11/06/2019 13:30	US-Vcm	ENF	5.319286805	2.3438	0.099165392	1935.101	18.7623	15.1058	1.428642839	NaN	NaN	694.86274	1.162988946	0.331344808	-0.049700884	897.0631914	949.5057449	2048.227521	28.28067732	0.38844169	159.40738	0.463574352	0.14714525
21/06/2019 12:00	US-Vcm	ENF	11.36370462	1.4483	NaN	2110.41	13.9938	13.98728	1.404694716	NaN	NaN	768.78767	1.450680272	0.351289418	-0.063772757	1112.702905	1066.602045	2022.97272	33.84773663	0.420419625	273.67551	0.527244898	0.222424
03/07/2019 13:00	US-Vcm	ENF	4.974897957	1.6877	NaN	1455.465	25.2753	16.81975	1.469910872	NaN	NaN	506.56647	1.662181122	0.468076679	-0.054646405	802.7309241	789.5103129	1431.494157	39.42077386	0.482364985	121.09115	0.551528841	0.291545667
08/07/2019 11:30	US-Vcm	ENF	8.496091368	0.6794	NaN	1731.198	37.9557	13.73056	0.996191893	NaN	NaN	648.22817	1.963424745	0.515796835	-0.029649278	1050.540894	1021.423563	1683.215228	41.60082572	0.640462965	297.90169	0.606828851	0.258893417
09/07/2019 13:00	US-Vcm	ENF	10.92954182	0.9057	NaN	2041.643	12.9611	16.8512	1.71564323	NaN	NaN	750.5335	1.981313776	0.51335186	-0.06661197	1247.274676	1215.883502	1990.259313	42.82715514	0.597849135	428.61283	0.610917127	0.181576667
13/07/2019 11:30	US-Vcm	ENF	8.209677043	1.7718	NaN	1439.387	33.7237	18.0716	1.413557889	NaN	NaN	525.53026	2.047608418	0.504291074	NaN	901.153848	289.6788358	462.6956334	47.37178766	0.390093943	164.44377	0.626067797	0.692637
19/07/2019 13:00	US-Vcm	ENF	6.317641219	1.4985	NaN	2152.948	16.4597	20.78998	2.118161994	NaN	NaN	786.95171	2.113422973	0.558982857	-0.066729817	1369.145708	1092.152379	1717.382793	49.04152199	0.454285191	235.30476	0.63593998	0.2971295
19/05/2018 13:30	US-WCr	DBF	12.15965821	0.4167	NaN	392.658	26.82899978	11.00921	0.978311356	34.66667	298.5925017	151.473	2.003114371	0.541054627	NaN	246.0865379	217.7054812	347.3729184	62.727312	0.423640133	76.29214	0.626719786	0.72593675
20/05/2018 13:00	US-WCr	DBF	13.39122285	0.2817	0.489987689	1782.293	9.297203356	17.14765	1.822561565	34.5	NaN	656.1774	2.047321783	0.57777993	-0.091254043	1127.047509	1180.888178	1867.435682	64.96575333	0.291273421	135.9228	0.632358153	0.234448167
25/05/2018 13:00	US-WCr	DBF	23.20968153	0.2877	0.437245148	679.1513	26.55968829	23.11172	2.152310255	33.1	262.3742268	220.2815	2.664711239	0.869708593	-0.063020497	471.1298484	1223.494367	1763.712897	102.368499	0.867718583	154.2308	0.693703816	0.389246667
28/05/2018 12:00	US-WCr	DBF	29.58258737	0.5483	0.435809606	1806.121	24.31089201	26.72377	2.764854069	32.2	263.8899703	639.6419	3.03	1.042433051	-0.048102275	1318.46833	1475.385033	2021.075387	124.4984568	0.583315429	316.571	0.73	0.344948
05/06/2018 13:00	US-WCr	DBF	22.54863307	0.2033	0.434970208	1800.221	18.17863185	17.94719	1.731196624	32.6	254.215613	638.3472	2.809362599	0.645471601	-0.105231095	1327.359379	1403.841496	1903.949287	93.81960854	0.46638445	259.0358	0.737331349	0.305341833
10/06/2018 13:00	US-WCr	DBF	22.25933429	0.335	0.437784663	1777.515	18.63356257	22.55995	2.304450385	31.7	274.1033001	630.3338	3.075731647	0.518560327	-0.11171721	1350.82323	1184.271994	1558.354333	86.74053511	0.542682728	291.1781	0.759950397	0.742658167
12/06/2018 12:30	US-WCr	DBF	34.43132624	0.2983	NaN	572.0134	33.78473223	19.95745	1.592895985	31.3	164.2805443	210.7962	3.181169395	0.468324614	NaN	439.8232597	537.6290743	699.2150324	83.93840188	0.785492426	158.1537	0.76890377	0.672874833
21/06/2018 13:00	US-WCr	DBF	33.56222067	0.1376	0.589349348	1422.765	26.36795508	22.11036	2.027886359	37.4	301.6263986	511.6543	2.232052951	0.905332403	NaN	915.2226097	823.8275548	1280.686249	70.67683551	0.758051063	219.4301	0.643270399	0.460786
26/06/2018 13:00	US-WCr	DBF	12.54826719	0.5405	NaN	457.2466	32.32848895	20.87473	1.724984515	34	208.5859691	164.2262	2.078407118	0.659960113	NaN	290.6800385	333.7680976	525.0251397	105.1378373	0.900749293	142.2062	0.635718316	0.7279595
30/06/2018 13:30	US-WCr	DBF	33.50665959	0.404	0.508642885	1331.007	28.27478446	29.93382	3.170745204	NaN	151.555127	492.315	2.252571615	0.75719996	-0.075933932	867.0826038	1078.777105	1655.966654	129.8979834	0.794332787	370.585	0.651448568	0.403195458
06/07/2018 13:00	US-WCr	DBF	20.42167085	-0.5506	NaN	1791.578	18.96748382	22.53687	2.291706105	NaN	194.3663976	647.2366	3.744249132	2.121397919	-0.103173112	1370.763233	1479.8434	1934.145019	154.4939959	0.67722068	414.8918	0.765115017	0.371035833
07/07/2018 13:00	US-WCr	DBF	29.24782456	0.8905	0.444592561	1780.234	24.27228471	24.12739	2.36261708	NaN	47.81414438	652.2534	3.977170139	2.330805086	-0.097627164	1393.975764	1487.615784	1899.820834	158.3800181	0.76397153	640.9741	0.783029514	0.3089405
07/08/2018 13:00	US-WCr	DBF	28.9782806	0.2282	NaN	1075.105	32.70592867	22.11441	1.853801168	31.7	110.4219125	413.1848	3.474001736	0.620063846	NaN	848.7123382	345.4691367	437.6224776	135.7419196	0.837445366	321.5443	0.789422743	0.5823095
23/08/2018 13:00	US-WCr	DBF	32.24227554	0.0056	NaN	1499.149	19.88692692	22.20448	2.219352064	24.1	130.3327494	560.2692	2.44375	0	-0.089241566	1108.745615	1230.47672	1663.743171	96.30654417	0.687030618	365.0902	0.739583333	0.328030333
28/08/2018 13:30	US-WCr	DBF	22.67090649	0.1057	0.531336368	633.212	33.98118858	20.43189	1.636543525	31.1	150.8564612	225.9541	2.345340402	0.429561219	NaN	459.258911	110.8987282	152.9037407	87.4323841	0.798782306	184.2069	0.725284598	0.87989175
25/09/2018 13:00	US-WCr	DBF	9.394656196	0.5336	0.435226299	197.8979	37.89702997	11.03815	0.831965101	30.7	521.7832297	74.0813	2.447866355	0.678195396	NaN	144.5076037	77.39539705	105.9901773	43.73419282	0.541554275	39.78431	0.730212922	0.923034333
26/09/2018 13:00	US-WCr	DBF	11.55434747	0.4251	0.501491271	812.9985	27.26980021	10.65635	0.949328304	30.6	189.1433449	325.8633	2.31012826	0.651139325	-0.025881735	580.5610507	858.3578792	1202.015994	41.50296854	0.692731056	181.0493	0.714098551	0.2820475
28/05/2019 13:00	US-WCr	DBF	6.275229046	-0.2261	0.602204115	1067.147	30.60970853	13.73337	1.114348487	40.8	471.7705573	440.9064	2.595703125	0.541157573	-0.07159292	762.9787417	1220.302648	1706.787147	98.12530811	0.489103217	184.7785	0.71497061	0.571664333
31/05/2019 12:00	US-WCr	DBF	8.421257869	0.29	0.575433024	1626.647	18.34424136	28.08017	3.235031753	38.7	NaN	606.4662	2.882291667	0.691337647	NaN	1206.35724	1136.227542	1532.084411	110.1996528	0.421714673	179.6685	0.741622024	0.292976
01/06/2019 13:30	US-WCr	DBF	14.20701899	0.4268	0.601556616	912.0622	17.64125641	18.582	1.815051277	38.5	196.1501724	316.4086	2.985221354	0.745275561	-0.067534438	685.1356618	1300.685643	1731.490966	114.5362132	0.621233372	211.1033	0.75119401	0.25055775
08/06/2019 13:00	US-WCr	DBF	12.14143472	0.0918	0.503480896	1780.401	12.66355826	26.53588	3.154441427	35.3	293.5752088	629.6369	3.274782986	0.734523534	-0.099585379	1382.530832	1487.765183	1915.920108	126.5193651	0.52336075	348.1055	0.776527778	0.292576667
12/06/2019 13:30	US-WCr	DBF	26.65063253	0.6066	0.527041004	1807.176	27.13134526	14.96889	1.26996359	38.3	141.1927933	683.6116	3.153320313	0.456075306	-0.062452046	1379.101185	928.8167369	1217.122669	121.1158533	0.422681983	279.0743	0.763125	0.68603025
13/06/2019 13:00	US-WCr	DBF	16.52926818	0.5379	0.48443448	1258.978	15.09947232	17.12599	1.703580415	37.7	126.1362086	457.147	3.116796875	0.393521505	-0.077460247	955.1730571	1413.837473	1863.526469	119.9166506	0.588929512	308.345	0.758689236	0.395126667
14/06/2019 12:30	US-WCr	DBF	20.40154265	0.6767	0.534397885	657.4612	49.47210849	12.81304	0.763063493	38.6	NaN	266.3162	2.924023438	0.449201474	NaN	478.5569902	508.9588622	699.2285373	121.3427132	0.192147305	11.16646	0.727886285	0.571501417
20/06/2019 12:30	US-WCr	DBF	24.78703126	0.5506	NaN	1375.382	20.94983509	19.41119	1.836831314	37	231.826253	510.015	1.742773438	0.790389373	-0.055183627	741.5183416	863.2059385	1601.090416	130.0811391	0.608487421	240.4191	0.539136285	0.411868917
27/06/2019 12:00	US-WCr	DBF	16.68910094	0.1761	NaN	512.5881	24.24560839	25.20606	2.524465309	35.5	166.1655156	170.7035	1.896875	0.650367294	NaN	301.8930331	118.5748223	201.3297301	134.4585905	1.09365945	191.8502	0.588958333	NaN
07/07/2019 12:00	US-WCr	DBF	26.47120147	1.1406	NaN	1748.348	19.70254771	22.40304	2.252111082	32.76667	102.6093226	641.6274	2.12	0.88640526	-0.05669558	1103.207588	1201.455303	1904.049609	154.0252058	0.774251681	472.2552	0.631	0.351272
18/07/2019 12:00	US-WCr	DBF	27.32950715	0.6697	NaN	1767.272	31.11503542	25.23528	2.299630863	31.8	118.7565261	663.6213	2.479166667	0.613561528	NaN	1255.867665	951.6013744	1339.104836	140.1716821	0.704680075	440.2283	0.710625	0.645512
15/05/2018 13:30	US-xBR	DBF	6.686302859	0.5541	0.406237302	176.06	84.12	15.9403	0.294979017	23.39	NaN	53.35	2.040427562	0.19169674	NaN	111.3547031	106.7903187	168.8433715	59.45778678	NaN	65.08321133	0.632481558	0.66660075
20/06/2018 12:00	US-xBR	DBF	20.62464731	0.777	0.312482192	1665.39	29.16	24.4334	2.251962499	4.586666667	368.4268423	633.34	2.6125	0	NaN	1117.893038	642.6149214	957.340665	118.1005658	0.707013821	362.8257174	0.67125	0.447156
22/06/2018 13:30	US-xBR	DBF	11.08924314	1.1737	0.372087853	1776.13	26.73	24.0229	2.271325741	4.34	615.755514	637.57	2.36015625	0.093912619	-0.060977128	1150.946116	1111.547649	1715.33063	120.0762462	0.461718013	267.5737186	0.648007813	0.4674585
30/06/2018 12:30	US-xBR	DBF	11.63438598	0.4709	0.311259979	1059.51	38.96	29.2933	2.598553552	13.1875	279.0860118	422.23	NaN	NaN	-0.04199489	NaN	NaN	1837.117872	135.3542249	0.927530526	262.446559	NaN	0.331468479
06/07/2018 12:00	US-xBR	DBF	16.21950522	0.9645	0.398257614	1322.13	56.67	24.9488	1.421494312	6.275	141.7653559	526.18	NaN	NaN	NaN	NaN	NaN	1322.35691	149.0362976	0.974022047	361.3213474	NaN	0.55678
08/07/2018 11:30	US-xBR	DBF	9.042442806	0.9953	0.329343547	1942.57	35.5	26.331	2.30103222	6.02	NaN	728.43	NaN	NaN	-0.104755555	NaN	NaN	1843.638666	150.2692077	0.577745711	338.2381611	NaN	0.409833646
16/07/2018 12:30	US-xBR	DBF	7.887929922	0.1068	0.329220261	1640.93	41.39	29.0452	2.458815964	14.6675	NaN	636.89	2.240651042	0.043727208	-0.056624711	1091.703464	1249.108003	1877.523396	NaN	0.559269693	196.2563405	0.665295573	0.360956667
20/07/2018 13:00	US-xBR	DBF	11.19381432	1.4077	NaN	1798.31	29.39	27.7376	2.740870949	8.0275	NaN	662.45	2.400766369	0.215958862	-0.110417903	1233.916963	1375.401827	2004.509974	NaN	0.584457063	227.7541229	0.686153646	0.446865667
24/07/2018 11:30	US-xBR	DBF	18.64374095	1.1807	0.365866604	1038.71	70.64	25.5946	1.001775088	6.0275	545.7069876	418.32	2.61421503	0.300736101	-0.03158985	739.9064042	1054.645735	1480.553575	NaN	0.69900096	171.7367324	0.712332031	0.493388861
25/07/2018 13:00	US-xBR	DBF	19.78729121	0.8873	NaN	767.48	79.07	24.41	0.664400174	6.03	525.8788901	306.45	2.717998512	0.25522411	NaN	555.7214753	135.4464071	187.0584693	NaN	0.951184885	108.1124624	0.724085938	0.902364833
26/07/2018 12:30	US-xBR	DBF	12.85546055	0.8456	0.475336049	729.45	71.12	24.5215	0.9230409	6.6525	624.6588086	309.91	2.813642113	0.213281686	NaN	536.0859123	172.3827994	234.5605997	NaN	0.873140855	118.4516337	0.734917969	0.81903175
27/07/2018 12:30	US-xBR	DBF	1.792209067	0.4009	0.48152089	637.49	53.72	27.4629	1.767205232	6.2525	NaN	234.05	2.911320685	0.17044687	NaN	475.555089	927.7883606	1243.716692	NaN	1.062478723	258.604227	0.745980469	0.657893083
29/07/2018 11:30	US-xBR	DBF	3.628224935	1.0902	0.395520848	1186.03	50.89	22.7843	1.410382543	6.1625	246.9644851	444.58	3.102607887	0.086562023	NaN	910.4494434	1071.297844	1395.565005	NaN	0.930223428	304.2468184	0.767644531	0.43374225
30/07/2018 13:00	US-xBR	DBF	2.945468467	0.8311	0.338885832	1011.41	44.51	25.4841	1.880685481	6.87	NaN	394.63	3.206391369	0.041050032	-0.027641201	788.2913737	1278.468147	1640.326802	NaN	0.805044789	163.3615022	0.779398438	0.3863095
31/07/2018 12:30	US-xBR	DBF	11.55601034	0.5864	NaN	1904.05	39.89	26.369	2.149340517	6.5975	670.7135771	733.27	3.29765625	0	NaN	1503.654069	645.2617999	817.0833674	NaN	0.574932172	351.7742653	0.789713542	0.555329333
02/08/2018 12:00	US-xBR	DBF	9.909457212	1.0183	NaN	1377.93	47.96	27.141	1.949209212	9.6225	237.9730619	521.57	3.075	0	NaN	1050.671625	1011.430697	1326.466488	NaN	0.821285021	342.1156781	0.7625	0.4901
22/04/2018 12:30	US-xRM	ENF	3.926268832	-0.023	NaN	2086.66	54.62	10.3726	0.580967937	20.404	NaN	825.41	0.620843697	0.082932535	-0.04906657	597.7739717	485.0289779	1693.099089	21.14636247	0.219794412	116.9067851	0.286474065	0.23194075
01/05/2018 13:00	US-xRM	ENF	5.473183557	0.1291	0.129499978	1899.64	50.59	7.6509	0.524090549	19.546	309.6736432	781.5	0.706356293	0.083431394	NaN	613.0074474	340.2436106	1054.376052	25.5291388	0.328578781	135.5583769	0.322696641	0.916278583
11/05/2018 13:00	US-xRM	ENF	6.020248461	1.05	0.141463198	569.22	76.47	11.1879	0.318444531	19.83	301.9443159	200.56	0.826965703	0.109090219	NaN	210.0699513	404.2811257	1095.467967	34.14043746	0.230417804	36.59872686	0.369048788	0.2456345
21/05/2018 13:30	US-xRM	ENF	2.460780879	1.7627	0.208740679	1028.24	29.28	16.5671	1.368476595	19.448	NaN	376.42	1.037308673	0.15104752	-0.060094915	448.9975869	643.4594411	1473.573033	37.57052951	0.249626692	41.76637359	0.436666135	0.1934965
23/05/2018 12:30	US-xRM	ENF	3.284423671	1.2253	0.22313553	2052.2	40.16	15.8465	1.104759399	24.006	NaN	833.78	1.023320578	0.16592418	-0.018394474	883.5159448	805.3553455	1870.651288	37.06054688	NaN	NaN	0.430521365	0.209203083
31/05/2018 13:30	US-xRM	ENF	4.739813057	3.4276	0.172948651	996.27	29.99	19.2433	1.609474948	18.654	431.8836117	358.49	0.996088435	0.206459888	-0.060764376	419.6808554	771.5503909	1831.564385	33.67653678	0.391159915	114.0679224	0.421252126	0.274176
03/06/2018 12:30	US-xRM	ENF	7.715966828	2.304	0.152926951	1319.15	40.03	17.8905	1.264237932	17.33	NaN	507.58	1.004138322	0.209078686	NaN	563.7917354	687.6745424	1609.008816	31.66018304	0.147937852	57.79982235	0.427390164	0.247224667
11/06/2018 13:30	US-xRM	ENF	4.06424728	2.5413	0.144996505	1859.24	8.27	21.9739	2.504917672	13.246	NaN	714.41	0.870849277	0.169652274	-0.050661763	715.0346929	723.1932231	1880.453888	27.47526444	0.294928436	128.7891049	0.384584396	0.27481775
19/06/2018 12:30	US-xRM	ENF	8.981256304	3.4582	0.211999011	1207.05	76.04	14.7989	0.412923706	13.242	277.8312495	492.38	0.857761125	0.147101106	-0.045152094	452.5428204	651.8721349	1738.713388	32.06634731	0.394245425	118.2974912	0.374916383	0.487516917
21/06/2018 13:30	US-xRM	ENF	9.554039779	1.7215	0.177136	1370.02	56.34	18.7981	0.97559174	12.796	344.4803233	553.16	0.867495748	0.144842096	-0.058157476	515.7095746	602.7170045	1601.161567	33.80061648	0.338209999	142.1496284	0.376424851	0.26797
01/07/2018 12:00	US-xRM	ENF	5.508990365	1.7766	0.12138428	2020.09	16.75	22.4188	2.337210231	9.668	NaN	780.58	0.780102041	0.227021748	-0.045270069	686.4183367	697.9227104	2053.946715	24.43415638	0.321892039	164.2153526	0.339795918	0.1749
03/07/2018 13:00	US-xRM	ENF	7.638174778	1.9892	NaN	1315.01	12.77	25.9245	3.036417685	8.944	480.8901164	504.8	0.759789541	0.203564782	-0.012364795	438.8901785	273.6164837	819.8142265	24.31600437	0.387502591	169.8130105	0.333754252	0.20775
05/07/2018 12:30	US-xRM	ENF	9.936543793	2.7728	0.144544406	695.23	74.01	16.5135	0.501171744	8.42	490.9891833	284.76	0.740098852	0.180825886	NaN	227.9642026	356.8719129	1088.364126	24.20146926	0.29328438	55.26473768	0.327897534	0.454145417
06/07/2018 12:00	US-xRM	ENF	4.334201137	1.3179	0.113152177	449.63	39.27	20.9357	1.553989053	8.21	365.7311068	141.92	0.730357143	0.169576117	NaN	146.12975	216.6696899	666.675969	24.14480453	0.788866168	85.12786254	0.325	0.518884
10/07/2018 12:30	US-xRM	ENF	1.994319894	1.8586	0.134664588	1956.84	26.84	NaN	NaN	7.78	NaN	774.3	0.692665816	0.139252847	-0.046965712	612.9913619	630.7935942	2013.669708	25.05328227	NaN	222.7175603	0.31325574	0.180686333
18/07/2018 11:30	US-xRM	ENF	5.083790839	1.9199	NaN	1926.46	23.38	24.3329	2.420762339	10.802	560.2065446	768.85	0.677338435	0.097352883	NaN	596.2227838	578.1906352	1868.196187	30.18040284	0.415852933	223.6576553	0.30949139	0.282774417
20/07/2018 12:30	US-xRM	ENF	2.297981989	2.1175	0.128212854	1864.74	15.02	27.818	3.314536212	9.738	NaN	730.17	0.698171769	0.08991304	-0.045016152	590.8151595	544.7843087	1719.456712	32.60251897	0.410662143	160.57135	0.31683514	0.312003333
31/07/2018 12:30	US-xRM	ENF	5.133414682	2.1873	0.144154325	1522.6	32.23	22.1944	1.876237052	8.854	747.6141725	596.27	0.823493304	0.140229291	-0.049988607	549.5040958	690.53765	1913.384512	26.1781041	0.386004392	140.5396884	0.360898526	0.169399167
14/05/2018 13:00	US-Rpf	DBF	4.018311525	0.4845	0.184056346	228.47951	54.69	9.37	0.541497956	28.65	NaN	47.614595	0.400390625	0.157063399	-0.005788788	45.65326042	NaN	NaN	NaN	0.701421516	19.740286	0.199813368	0.198121333
15/05/2018 12:30	US-Rpf	DBF	7.56769317	0.5769	0.171543983	1221.839756	43.25	10.14	0.715059053	28.8	NaN	324.627835	0.41656436	0.167347349	-0.005243386	249.8903972	NaN	NaN	NaN	0.341728136	80.359287	0.204519779	0.184719417
17/05/2018 13:30	US-Rpf	DBF	6.205793509	0.4023	0.186437065	950.414179	44.24	9.41	0.668224621	28.75	NaN	259.568836	0.450288318	0.18879048	-0.033605856	203.7052622	NaN	NaN	NaN	0.322925387	64.508702	0.214333147	0.12086475
19/05/2018 13:00	US-Rpf	DBF	5.662370088	0.2827	0.163765099	1324.305695	29.89	14.94	1.219561506	28.9	NaN	366.030161	0.482979911	0.209577188	-0.013448849	296.4406732	NaN	NaN	NaN	0.357474474	107.404141	0.223846106	0.700697333
25/05/2018 13:00	US-Rpf	DBF	10.01979005	-0.6101	0.168066937	1069.067969	51.88	11.33	0.6575457	30.8	NaN	300.273013	0.805660962	0.27956001	NaN	362.4556694	NaN	NaN	55.42795943	0.374643	72.772555	0.339038938	0.441963333
30/05/2018 13:00	US-Rpf	DBF	7.177919049	0.222	0.161837882	1905.315572	42.53	13.61	0.915370081	29.85	NaN	530.789225	1.146130952	0.371313076	-0.016469964	841.4494022	NaN	NaN	60.02342946	0.338409249	90.333276	0.441632564	0.291560833
31/05/2018 12:30	US-Rpf	DBF	8.375417359	0.276	0.165479624	1185.987676	53.43	12.05	0.668121552	30	NaN	328.694947	1.223065476	0.39845546	-0.054512569	545.2164333	NaN	NaN	62.79527955	0.397532053	93.418781	0.459715092	0.119698
04/06/2018 13:00	US-Rpf	DBF	9.548192309	-0.5989	0.15651597	558.94971	49.23	15.46	0.913867866	28.6	368.1074089	120.707323	1.538988095	0.509912485	-0.039833312	298.4617473	NaN	NaN	74.17755755	0.669831764	68.868432	0.533968874	0.1842185
05/06/2018 12:30	US-Rpf	DBF	12.41828798	0.2187	0.164480497	850.754883	36.98	17.51	1.296334901	28.15	355.7708489	204.727384	1.614939856	0.536488405	-0.047012266	469.4607659	NaN	NaN	76.86119551	0.660969957	105.526912	0.551816716	0.257430833
08/06/2018 13:30	US-Rpf	DBF	8.673541684	0.264	0.161198422	436.598924	47.76	13.36	0.818314162	27.3	519.8377037	93.598631	1.710444568	0.538099175	-0.093750469	250.4872629	NaN	NaN	72.59265287	0.877520053	49.264927	0.573723958	0.160097
09/06/2018 13:00	US-Rpf	DBF	12.09667332	1.8687	0.182481487	1207.896825	41.8	16.97	1.156070399	27.1	639.2441112	321.619914	1.741189236	0.538617711	-0.013174162	701.5178363	NaN	NaN	71.21853299	0.509781475	98.521964	0.58077629	0.255945833
12/06/2018 12:00	US-Rpf	DBF	11.20200122	0.4449	0.164060631	950.531382	39.85	9.02	0.701695204	27.4	568.3254291	247.772219	1.834077381	0.54018435	-0.014987361	572.2991029	NaN	NaN	67.06693673	0.497365987	80.853956	0.602083333	0.164656
14/06/2018 13:00	US-Rpf	DBF	10.9825845	0.0194	0.144273173	1038.363316	42.33	13.08	0.886630033	26.7	454.2114903	297.224104	1.853385417	0.533124142	-0.045908926	631.2757078	NaN	NaN	67.95679414	0.458542925	106.567684	0.607952629	0.129973833
20/06/2018 13:00	US-Rpf	DBF	11.36093901	-0.6603	0.14242236	1988.306383	30.32	21.3	1.824261184	24.75	687.981659	532.031119	1.78374256	0.489407027	-0.063510364	1193.52874	NaN	NaN	81.16570618	0.486865895	177.283644	0.600274058	0.160148167
21/06/2018 12:30	US-Rpf	DBF	14.07155627	0.1564	0.15724274	1544.221546	30.19	24.59	2.240580814	23.95	557.1942326	414.506828	1.773177083	0.482637082	NaN	925.2159157	NaN	NaN	83.32494414	0.5969603	158.513273	0.599147135	0.237632833
25/06/2018 13:00	US-Rpf	DBF	11.27603238	0.3676	0.146172497	960.838383	35.85	18.71	1.425391155	22.9	669.6010538	239.555887	1.880877976	0.523678473	-0.078810691	594.1380602	NaN	NaN	92.87481112	0.614792142	95.664607	0.618353795	0.1851995
26/06/2018 12:30	US-Rpf	DBF	11.74641568	1.0134	0.159954074	2092.190909	40.76	19.86	1.416321649	22.35	699.9293594	570.248645	1.907105655	0.533673008	-0.021180365	1303.499928	NaN	NaN	95.20042639	0.420746114	149.595342	0.623031064	0.163901833
06/07/2018 13:00	US-Rpf	DBF	16.99087668	0.4953	0.134442756	1210.749758	53.89	18.25	0.994783519	21.45	303.7123131	334.924789	1.719698661	0.759837999	NaN	688.210792	NaN	NaN	88.0220892	0.60013152	134.939148	0.568417039	0.212663
07/07/2018 12:30	US-Rpf	DBF	14.76248807	0.0149	0.15415851	1680.898718	39.06	20.74	1.540277398	20.9	375.0440049	469.481887	1.684278894	0.786006976	-0.063809672	940.0713734	NaN	NaN	86.07496725	0.598543119	171.284442	0.559267113	0.196096833
13/07/2018 12:30	US-Rpf	DBF	11.33693745	0.8101	0.133064951	1637.916274	37.3	19.65	1.479200188	23.75	420.4799013	449.211116	1.956600322	0.649960354	-0.068830647	1019.572413	NaN	NaN	83.99886771	0.587685702	179.26648	0.622481399	0.199483583
18/07/2018 12:30	US-Rpf	DBF	11.81029361	-0.1029	0.129071148	1913.076272	46.63	16.28	1.013610112	22	666.297007	520.554037	2.056318204	0.592948323	-0.018630754	1236.593618	NaN	NaN	91.82179141	0.47752047	136.332608	0.646390129	0.316903083
29/07/2018 12:30	US-Rpf	DBF	11.88833661	0.4116	0.113091889	1791.724178	41.74	22.03	1.596511075	15.9	603.1111575	479.588941	1.992878844	0.61457516	-0.029803521	1132.024067	NaN	NaN	94.14353861	0.580400548	157.461501	0.631807106	0.17098025
31/07/2018 13:30	US-Rpf	DBF	12.03200856	0.0554	0.116166785	1787.264213	38.31	24.13	1.924964825	15	611.7810151	503.196415	1.95796131	0.628235853	-0.045709203	1113.953312	NaN	NaN	89.93688513	0.490503798	145.30928	0.623272879	0.171514
03/08/2018 12:30	US-Rpf	DBF	11.33017038	-0.1057	0.101031312	640.953321	67.96	16.33	0.610494766	14.75	372.6673297	173.49947	1.545907738	0.627111055	-0.018061929	336.2554863	NaN	NaN	72.88823383	0.610696366	68.648533	0.524617746	0.592782083
07/08/2018 13:00	US-Rpf	DBF	16.13650495	1.3801	0.166536658	1574.920946	56.8	13.15	0.667281431	23	277.3898472	491.640889	0.985863095	0.625582282	NaN	615.054088	NaN	NaN	49.71647537	0.457802112	151.13881	0.390530134	0.419707333
08/08/2018 12:30	US-Rpf	DBF	15.64996051	0.6058	0.13669039	1046.279303	49.86	11.81	0.707778746	22.45	230.6951318	313.410748	0.853177703	0.624964133	NaN	375.6488473	NaN	NaN	44.19889725	0.683300023	125.631329	0.359033048	0.671355
13/05/2019 12:30	US-Rpf	DBF	5.312204242	0.0899	0.160575104	1981.851334	25.17	14.6	1.272785091	24.6	NaN	548.111452	NaN	NaN	NaN	NaN	NaN	NaN	56.10165694	0.361699404	147.923772	NaN	0.1447055
16/05/2019 13:00	US-Rpf	DBF	4.427349478	0.7052	0.173635226	1870.994686	28.17	14.36	1.202516221	26.5	NaN	529.012736	NaN	NaN	NaN	NaN	NaN	NaN	57.31809012	0.377792534	162.931368	NaN	0.113154
17/05/2019 13:00	US-Rpf	DBF	6.696799859	0.7363	0.166110414	869.802891	39.91	14.07	0.986822756	27.25	NaN	221.667633	NaN	NaN	NaN	NaN	NaN	NaN	57.72077144	0.36518025	67.787861	NaN	0.122502333
27/05/2019 13:00	US-Rpf	DBF	10.46788695	0.4627	0.154207058	1979.051257	23.92	16.94	1.50829647	30.1	691.6188714	544.45273	NaN	NaN	NaN	NaN	NaN	NaN	76.55355822	0.461253155	153.947234	NaN	0.165722
04/06/2019 12:00	US-Rpf	DBF	13.31560479	-0.0981	0.143807712	2030.506486	22.19	16.21	1.47104589	26.45	438.9546611	545.083689	NaN	NaN	NaN	NaN	NaN	NaN	77.03028549	0.484774648	197.98412	NaN	0.265568
12/06/2019 13:00	US-Rpf	DBF	14.1549722	0.9253	0.157495744	2232.152074	30.96	19.49	1.612294491	23.1	472.170614	631.090863	NaN	NaN	NaN	NaN	NaN	NaN	93.36118345	0.424753391	195.318094	NaN	0.1491305
16/06/2019 13:30	US-Rpf	DBF	13.03778397	0.6913	0.141768882	2144.122503	27.79	22.04	1.980019958	20.95	421.3512574	589.565133	NaN	NaN	NaN	NaN	NaN	NaN	102.2598078	0.497200663	224.190885	NaN	0.18258975
17/06/2019 13:00	US-Rpf	DBF	9.125698363	0.7466	0.137440068	417.435683	33.02	18.7	1.487320914	20.4	189.8756214	80.667272	NaN	NaN	NaN	NaN	NaN	NaN	104.3823745	1.484001057	91.565066	NaN	0.2751955
23/06/2019 13:00	US-Rpf	DBF	6.0518302	1.7935	NaN	369.461426	83.3	14.53	0.282739404	17.85	370.7306962	90.384036	NaN	NaN	-0.069528223	NaN	NaN	NaN	105.3815426	0.823831962	46.935025	NaN	0.460699667
24/06/2019 12:30	US-Rpf	DBF	16.83338954	1.4955	NaN	1803.895599	42.66	18.71	1.274075274	18.2	158.9021711	516.060391	NaN	NaN	-0.041072458	NaN	NaN	NaN	101.7455552	0.629424	274.272729	NaN	0.212336167
25/06/2019 12:30	US-Rpf	DBF	20.43116523	0.6226	NaN	2088.045784	30.04	19.98	1.685386483	17.45	187.9002066	619.659883	NaN	NaN	-0.056446364	NaN	NaN	NaN	98.03220647	0.552543273	300.766777	NaN	0.184775833
28/06/2019 13:00	US-Rpf	DBF	10.24661718	1.0269	NaN	1981.561458	39.6309992	24.8301684	1.966200624	11.7	NaN	NaN	NaN	NaN	-0.042991624	NaN	NaN	NaN	86.81479874	0.516215334	204.41888	NaN	0.197876667
05/07/2019 12:30	US-Rpf	DBF	11.90631862	0.0715	NaN	1872.563671	47.15562851	21.35395953	1.388182838	11	NaN	NaN	NaN	NaN	-0.052601323	NaN	NaN	NaN	107.0654096	0.546691949	146.693041	NaN	0.186996583
09/07/2019 13:00	US-Rpf	DBF	10.75278331	0.7678	NaN	1760.994162	23.8322843	27.13161474	2.851331332	9.3	NaN	NaN	NaN	NaN	NaN	NaN	NaN	NaN	107.8323929	0.60569937	184.902903	NaN	0.230810167
10/07/2019 12:30	US-Rpf	DBF	12.43784766	0.6054	NaN	838.8669801	39.70970945	23.44953968	1.80417042	8.9	NaN	NaN	NaN	NaN	-0.034051451	NaN	NaN	NaN	104.4466749	0.796874413	134.403524	NaN	0.218387833
14/07/2019 13:00	US-Rpf	DBF	13.64298198	0.1446	NaN	1729.844446	49.93991653	21.21250753	1.303428288	9.8	NaN	NaN	NaN	NaN	-0.008219117	NaN	NaN	NaN	90.54361979	0.574865732	155.201211	NaN	0.506451667
18/07/2019 13:30	US-Rpf	DBF	14.41552876	0.2188	NaN	1827.786225	56.83658802	21.01900242	1.110285096	8.3	NaN	NaN	NaN	NaN	-0.050277043	NaN	NaN	NaN	87.67300829	0.549796333	205.089734	NaN	0.24853375
21/07/2019 12:30	US-Rpf	DBF	13.33499988	-0.1942	NaN	1367.000421	51.30787449	18.64810905	1.077645943	7.7	NaN	NaN	NaN	NaN	-0.016096279	NaN	NaN	NaN	88.10100791	0.4836994	119.079309	NaN	0.26460675
27/07/2019 12:00	US-Rpf	DBF	20.28142276	0.5893	0.156904712	1924.355463	54.21757	16.76218061	0.89722603	13.8	NaN	NaN	NaN	NaN	NaN	NaN	NaN	NaN	79.4849537	0.483068297	222.850737	NaN	0.39984
30/07/2019 13:00	US-Rpf	DBF	17.41426656	1.5631	0.165303301	1596.559824	55.17917195	16.97928717	0.890846231	14.4	NaN	NaN	NaN	NaN	-0.020592332	NaN	NaN	NaN	72.71542647	0.534346938	183.71878	NaN	0.1894125
22/07/2018 12:00	US-SRM	WSA	10.3170889	1.0493	0.076288414	1959.63	27.61494715	34.22	4.099298232	NaN	240.829247	728.2	0.304285714	0.06741069	-0.043503052	335.6266299	355.9625577	2078.365793	8.077739198	0.596490406	301.6236659	0.171270408	0.16488
24/07/2018 10:00	US-SRM	WSA	9.699851381	1.0405	0.073214426	1730.613	21.18304234	35.45	4.785480301	NaN	389.1852755	622	0.308797477	0.068349296	-0.04189044	301.9136053	309.7646937	1775.616589	7.443978266	0.528533628	211.3926747	0.174454719	0.182306667
27/07/2018 12:30	US-SRM	WSA	4.260112893	0.3243	0.079862647	1997.406	24.03325938	35.9	4.730713514	NaN	NaN	724.4	0.324767042	0.081662588	NaN	363.4040095	269.2601583	1479.955757	8.656543371	0.287749857	101.8231894	0.181937978	0.29368575
07/08/2018 10:30	US-SRM	WSA	5.153024326	0.2261	0.066764388	1754.223	25.37440246	34.07	4.190262589	NaN	613.1888319	636.2	0.434906463	0.173866683	NaN	392.3353862	425.659827	1903.224346	13.22197306	0.323063789	128.5892493	0.223651945	0.1617265
10/09/2018 12:00	US-SRM	WSA	10.101491	0.5099	0.085402037	1798.295	20.27928867	33.19	4.256894132	NaN	554.577985	659.4	0.513010204	0.117415812	-0.047708676	493.8047729	516.9658881	1882.641122	16.48984053	0.392679023	149.2332681	0.274596088	0.180964
14/09/2018 12:00	US-SRM	WSA	2.590480036	0.1733	0.081155378	1584.231	13.68414753	36.29	5.494085842	NaN	672.7181269	543.5	0.475255102	0.101300638	-0.049162404	421.255914	477.5826127	1796.060672	16.34837963	0.392085849	146.2960447	0.265905612	0.213104
09/04/2019 11:00	US-SRM	WSA	5.127934871	-0.4758	0.06105254	1781.328	10.31310558	28.4	3.621434816	NaN	NaN	604.3	0.3359375	0.064175315	NaN	338.0433416	346.5469268	1826.137859	9.815792717	0.271132396	118.3338083	0.189770408	0.31832866
11/04/2019 12:00	US-SRM	WSA	3.856300606	-0.207	NaN	2005.728	13.48435773	16.43	1.659257584	NaN	525.9621156	701.8	0.337627551	0.064912388	-0.045608193	382.2566224	365.7899661	1919.326269	9.846000514	0.151748665	68.93223976	0.190582483	0.172912
18/04/2019 11:30	US-SRM	WSA	6.895934234	0.341	0.071694872	2033.472	23.2097702	22.64	2.185677633	NaN	512.2435491	716.8	0.34385895	0.074392542	-0.04457398	390.018078	364.9629977	1902.840096	9.273827321	0.189204747	87.61797753	0.191799089	0.302011583
03/05/2019 11:30	US-SRM	WSA	7.179615011	-0.0758	0.054629247	2048.976	11.3754079	25.85	3.071081145	NaN	587.8056364	710.9	0.337298044	0.073393871	-0.047671107	387.0088358	390.0711627	2065.189155	7.061189879	0.233913302	109.7676913	0.188879145	0.203833417
04/05/2019 11:30	US-SRM	WSA	5.911328969	0.1202	0.064728372	2008.176	11.24949907	27.91	3.480643936	NaN	597.7367106	693.4	0.334747024	0.075105922	-0.042946929	376.6898888	367.3191031	1958.219292	6.858643583	0.269493177	114.5828567	0.187578125	0.2921755
16/05/2019 12:30	US-SRM	WSA	5.452944899	-0.1016	0.08063849	2077.536	11.75265707	27.6	3.397465111	NaN	499.0919327	733.3	0.327535077	0.049485223	NaN	385.3202133	350.1036222	1887.658248	9.687526792	0.27661889	128.9840728	0.185469813	0.28611875
17/05/2019 10:30	US-SRM	WSA	9.200346986	-0.4121	0.073314327	1945.344	36.80292145	18.34	1.37132125	NaN	315.3677794	686.4	0.326833546	0.048094519	NaN	357.3453012	364.9924282	1986.974022	9.292615098	0.255163161	102.2091003	0.183692602	0.19049575
25/05/2019 11:30	US-SRM	WSA	5.21779667	0.5262	0.05894624	2088.144	10.78335091	26.21	3.159636042	NaN	633.8188146	733.9	0.310517645	0.025389771	NaN	370.0288976	345.9906469	1952.491544	6.300402145	NaN	96.61062378	0.177204684	0.288961583
26/05/2019 11:00	US-SRM	WSA	5.44015399	0.4832	0.054547326	2034.288	15.83289539	23.7	2.557846038	NaN	435.4117885	722.5	0.307769983	0.021838511	-0.042558682	360.2651683	383.9186394	2167.850655	5.971431863	0.220153608	110.8340489	0.177096443	0.165184667
28/05/2019 10:30	US-SRM	WSA	8.104283456	-0.8635	0.058151406	1955.952	18.2977357	20.89	2.084637669	NaN	472.4104334	678.4	0.302216199	0.014660433	-0.044618384	345.9642076	319.707877	1807.508545	5.30649193	0.221014853	90.48471921	0.176877657	0.2118305
13/06/2019 10:30	US-SRM	WSA	1.732899074	1.2491	0.075076713	1943.712	9.596777201	34.98	5.345211707	NaN	NaN	639.3	0.298038903	0.024988766	NaN	324.5366838	309.3212788	1852.584042	5.126450778	0.150546564	59.74916391	0.166967474	0.2244335
15/06/2019 11:30	US-SRM	WSA	3.763299122	1.0869	0.066837727	2081.616	6.636919006	30.99	4.390267154	NaN	NaN	696.7	0.297454294	0.02581945	NaN	345.6106514	314.2038726	1892.452694	4.8066567	0.126384862	50.23053057	0.166029974	0.30587325
19/06/2019 12:00	US-SRM	WSA	2.305178461	0.8037	0.067956024	2086.512	4.761181752	31.97	4.740595661	NaN	NaN	694.9	0.296428571	0.027657277	NaN	342.5712049	321.8419771	1960.255672	4.147376543	0.177874098	85.77840266	0.164183673	0.286704
20/06/2019 11:30	US-SRM	WSA	3.911429958	0.994	NaN	2069.376	5.684923495	31.98	4.697331219	NaN	NaN	699.8	0.296178784	0.02810483	-0.045101087	338.8273261	348.8543641	2130.615782	3.986826453	0.170425004	85.69425048	0.163734056	0.211789917
21/06/2019 11:30	US-SRM	WSA	2.752543731	0.9142	NaN	2086.512	6.729338629	31.27	4.457971285	NaN	NaN	700.8	0.295923682	0.028561906	NaN	340.6749807	333.3177037	2041.451319	3.822860404	NaN	72.3324579	0.163274872	0.300298917
22/06/2019 11:00	US-SRM	WSA	3.802615463	1.371	NaN	1981.248	10.33472075	29.9	3.955954404	NaN	NaN	661.4	0.295673895	0.028050476	NaN	322.5003388	313.1367433	1923.723704	3.820984975	0.127383058	54.41224397	0.162776361	0.262909
24/06/2019 12:00	US-SRM	WSA	3.713349031	0.9024	NaN	2086.512	8.211556159	31.98	4.571493114	NaN	735.3221664	693.4	0.295153061	0.026940621	NaN	337.4613796	313.0902847	1935.826366	3.824266975	NaN	127.0368823	0.161734694	0.295524
25/06/2019 13:30	US-SRM	WSA	1.55162442	0.5932	NaN	1958.4	8.616248893	35.02	5.415422779	NaN	NaN	643.9	0.294882015	0.026363043	-0.044245197	315.6795918	338.7194974	2101.334013	3.825974955	NaN	43.56517004	0.161192602	0.18492
26/06/2019 13:00	US-SRM	WSA	2.001462829	0.4297	NaN	1959.216	13.67977254	33.81	4.775627674	NaN	NaN	659.8	0.294632228	0.025830765	NaN	314.83235	284.9089518	1773.001335	3.827548975	NaN	52.94178794	0.160693027	0.291926
12/06/2018 13:00	US-xDL	MF	22.10144405	-0.0432	NaN	105.31	68.5	29.211	1.334499219	16.7075	439.8926963	841.21	2.071923363	0.68559686	NaN	55.41765062	1059.140776	2012.682131	86.35679227	0.711088681	355.0463642	0.526233507	NaN
14/06/2018 12:30	US-xDL	MF	32.43943406	0.1054	0.42832	198.48	71.86	27.6394	1.08592487	18.32	318.3290459	534.66	2.138519965	0.691469416	NaN	105.0173703	864.0509917	1633.033091	87.09457251	0.755859597	278.3833415	0.529108073	NaN
19/06/2018 12:30	US-xDL	MF	19.59963263	-0.0769	0.3796	387.44	58.03	30.9766	1.972039975	19	489.4639056	769.51	3.404740203	0.720386754	NaN	268.4582282	1222.261747	1763.973093	144.8845674	0.809222069	311.7555818	0.692902716	NaN
21/06/2018 12:00	US-xDL	MF	29.36237288	0.1057	0.359298898	175.16	70.62	28.4877	1.192518027	17.9925	237.1047891	484.93	3.905952381	0.7318332	NaN	132.7254048	1489.086295	1965.172801	167.7597737	0.882144687	292.4213829	0.757738095	NaN
01/07/2018 12:00	US-xDL	MF	22.02217915	0.3312	0.365514781	207.04	69.71	28.8951	1.259500401	13.9925	NaN	631.89	3.282857143	0.827623867	-0.003304158	143.6931543	1487.953521	2143.914918	NaN	0.677104524	229.744745	0.694035714	NaN
04/07/2018 13:00	US-xDL	MF	28.51660721	0.0725	0.368063967	154.29	67.06	30.2274	1.481463909	18.1675	NaN	742.2	3.352018849	1.05601229	NaN	108.6051978	1341.561733	1905.889993	NaN	0.848717757	335.6649291	0.703903026	NaN
05/07/2018 12:30	US-xDL	MF	31.66449922	0.4116	0.3693	966.35	58.96	29.8868	1.809246019	17.605	NaN	719.3	3.374283234	1.12953459	-0.041474654	683.2862643	1323.867393	1872.303487	NaN	0.913307958	602.6502388	0.707079489	NaN
06/07/2018 12:00	US-xDL	MF	24.61149589	0.2259	NaN	355.69	65.43	30.4367	1.573939685	16.99	NaN	745.6	3.396547619	1.20305689	-0.044275177	252.6309397	1514.66794	2132.566345	NaN	0.844208278	557.07383	0.710255952	NaN
09/07/2018 13:00	US-xDL	MF	20.32916337	-0.0116	0.386871576	400.21	58.69	29.7837	1.81014975	18.4	NaN	845.4	3.028513145	1.08494494	NaN	263.673078	1265.374194	1920.618555	148.849525	0.751626152	423.7903143	0.658836806	NaN
11/07/2018 12:30	US-xDL	MF	21.87538677	-0.0829	NaN	986.29	57.25	31.0887	2.02184576	17.31	NaN	791.98	2.649703001	0.897660627	NaN	597.5408122	1170.339952	1931.741845	122.3775981	0.880990028	472.5856247	0.605846974	NaN
14/07/2018 13:00	US-xDL	MF	21.44565577	-0.1385	NaN	123.93	65.86	29.7621	1.494071454	15.8275	NaN	353.52	2.071519097	0.611805623	NaN	65.05925424	1062.660878	2024.240274	81.97307822	1.63676734	202.9897097	0.524967758	NaN
15/07/2018 12:30	US-xDL	MF	26.90989235	-0.4966	0.383033623	658.77	66.54	31.094	1.582966866	15.46	NaN	787.18	1.893693576	0.5212218	-0.022350351	329.4162066	517.8933623	1035.688601	69.3077056	0.82059027	500.6537832	0.500047371	NaN
20/07/2018 13:00	US-xDL	MF	25.49216089	0.0371	0.358847635	195.24	65.86	30.1031	1.52428741	15.49666667	NaN	752.06	3.242893105	0.545614083	-0.028847647	132.347056	1277.974098	1885.283061	106.0874405	0.850205969	646.0022796	0.677868552	NaN
22/07/2018 12:00	US-xDL	MF	30.49629903	-0.3255	NaN	791.16	59.27	30.8885	1.90397537	14.91333333	142.3128995	782.62	3.769136905	0.555128086	-0.039310761	591.1754729	1246.445558	1668.096721	120.4330633	0.874209027	539.6811673	0.74722619	NaN
28/07/2018 12:00	US-xDL	MF	17.24379462	0.0429	0.302411994	432.02	54.7	30.7063	2.095216703	13.04333333	98.41679369	627.99	3.449315476	0.7100189	NaN	317.2878314	1485.469585	2022.619547	146.1202739	0.836075513	532.3306301	0.734428571	NaN
31/07/2018 12:30	US-xDL	MF	25.559965	-0.0716	0.395961795	364.14	63.76	29.7265	1.582657574	12.65666667	180.9032733	714.87	3.098434754	0.799088872	NaN	257.0179601	1416.878924	2007.417268	157.1249879	0.810351065	451.2033652	0.705821827	NaN
05/08/2018 13:00	US-xDL	MF	28.64651174	0.4044	0.389647175	209.12	59.8	30.7074	1.85945078	17.57666667	262.5061993	730.47	3.639305733	0.570237899	-0.081985094	163.8208804	656.0611116	837.4726063	154.1467737	0.767644693	408.9566827	0.783382175	NaN
07/08/2018 12:00	US-xDL	MF	12.01627521	-0.3367	NaN	233.39	59.81	31.2782	1.92184002	16.1975	NaN	767.49	3.850267857	0.480976524	NaN	189.8940226	1594.754752	1960.03964	152.9851466	NaN	NaN	0.813633929	NaN
08/08/2018 12:00	US-xDL	MF	30.68010986	-0.1918	0.351898977	179.06	63.36	30.0697	1.632706385	15.645	241.0242255	767.67	3.957993197	0.435396248	-0.081810635	148.4553571	1548.921563	1868.237701	152.3919753	0.822534197	467.2730512	0.829081633	NaN
09/08/2018 13:30	US-xDL	MF	26.43444276	0.4889	0.45002	309.58	60.28	30.6785	1.834151056	15.0425	NaN	412.49	3.931995376	0.448382133	-0.056429889	255.7748446	1440.811199	1743.902265	151.2237172	0.886237219	552.831845	0.826199511	NaN
12/08/2018 12:30	US-xDL	MF	27.63636099	0.2047	NaN	865.96	62.81	31.2292	1.773324316	17.145	208.0202088	709.78	3.859609286	0.484538911	-0.085574408	708.5066328	1412.117625	1725.936388	147.9709201	0.86780596	423.9891551	0.81817478	NaN
13/08/2018 12:00	US-xDL	MF	30.37398852	0.3632	0.389643073	118.17	69.36	28.9035	1.274687314	16.52	330.9046843	711.29	3.83565051	0.496506295	NaN	96.36984566	1631.882432	2001.036172	146.8942901	0.756139052	373.1900697	0.815518707	NaN
16/08/2018 13:00	US-xDL	MF	25.23460323	0.1159	0.378132178	206.64	57.6	30.9535	1.989564749	15.0025	226.3230196	716.56	3.760414895	0.532978	NaN	166.7929054	1498.608029	1856.627909	143.5239439	0.87421823	465.5658905	0.807166596	NaN
22/08/2018 12:30	US-xDL	MF	20.2662494	-0.0048	0.42147	271.25	63.3	27.5235	1.40648014	17.55666667	224.56375	660.94	3.497809488	0.505092498	-0.020540541	210.6002434	661.3919079	851.8629995	133.2299503	0.847371647	435.4658437	0.776406427	NaN
23/08/2018 12:30	US-xDL	MF	24.77516399	-0.2394	NaN	224.4	61.23	26.8291	1.425230561	17.20333333	488.4733823	671.2	3.45388942	0.50042872	-0.076518207	173.0711635	1422.489403	1844.366303	131.5083068	0.782787971	365.2502746	0.771261869	NaN
26/08/2018 13:00	US-xDL	MF	24.98085279	-0.2192	0.362302685	86.15	57.84	30.7243	1.952035315	15.86333333	114.9559191	746.53	3.324773243	0.504693951	-0.100988909	65.34242773	1307.812845	1724.271358	126.6882207	0.878161206	568.329808	0.758472754	NaN
31/08/2018 13:00	US-xDL	MF	27.21250784	-0.2143	NaN	123.42	72.51	27.3315	1.041485397	13.975	418.4630372	513.43	3.113888889	0.526322963	NaN	91.26772129	1150.187054	1555.381072	119.0123591	0.798076832	263.990684	0.73948891	NaN
01/09/2018 13:00	US-xDL	MF	12.30506168	0.1488	0.42725112	54.36	67.85	29.6165	1.394984115	13.9975	299.8007704	466.65	3.07456987	0.530756312	-0.049370151	40.00567421	914.8933358	1243.163694	117.2777885	0.91342691	221.3770521	0.735939555	NaN
19/04/2018 13:30	BEVie	MF	0.683075576	0.3936	0.300781824	1626	29.44	23.71	2.145645144	21.374	628.7711315	606	2.078794111	0.821685074	-0.073214691	1132.078476	1127.325426	1619.173212	687.5872396	0.189251328	76.2226	0.696235225	0.4321245
03/05/2018 12:30	BEVie	MF	20.31775558	0.9552	0.24227667	1329	48.2	11.53	0.717491995	22.754	172.3345573	521.5	2.207742436	0.734384144	-0.061600404	919.9336682	1177.25193	1700.739814	899.4590567	0.214016781	101.237	0.692199901	0.44279625
07/05/2018 12:30	BEVie	MF	13.74996558	1.1083	0.214586561	1881	34.12	20.54	1.64428086	21.09	179.4098972	708.9	2.106323785	0.780145811	-0.07496044	1253.135193	1188.062024	1783.322885	899.8648727	NaN	209.402	0.666206907	0.430949167
10/05/2018 13:30	BEVie	MF	17.51086558	1.7214	0.254645047	1478	69.8	12.13	0.435610691	19.9365	129.857211	609.2	1.999774926	0.820820334	NaN	950.3080874	297.4303519	462.5889918	882.1640625	0.358355341	118.053	0.642968936	0.46448875
14/05/2018 12:00	BEVie	MF	18.87093558	1.1482	NaN	741	91.16	13.2	0.137002618	19.3385	24.78778325	339.7	1.967202381	0.791023698	NaN	472.9035536	172.2519932	269.9043516	846.125	0.617560116	148.307	0.638196429	0.807184
15/05/2018 12:00	BEVie	MF	20.39500558	0.77	0.242579627	1520	45.21	18	1.163206297	19.6055	94.76422165	579.7	1.98485119	0.763170824	-0.070983577	977.6811905	844.763461	1313.352935	833.7430556	0.536904803	247.075	0.64321131	0.40302
18/05/2018 12:30	BEVie	MF	18.70066558	1.2592	0.269982636	1894	54.46	12.45	0.671179958	19.1985	95.60799295	740.1	2.038165303	0.679031932	-0.073586899	1246.934653	1191.053308	1809.120439	796.339265	NaN	185.257	0.658360429	0.435812417
23/05/2018 12:30	BEVie	MF	25.21416558	1.2349	0.261180595	1185	72.75	18.8	0.608980861	18.671	47.27478203	522.9	2.134950397	0.631332036	NaN	800.5481752	832.5607615	1232.386174	920.672309	0.506233291	268.698	0.67556808	0.493228083
20/06/2018 12:00	BEVie	MF	15.46181558	1.5804	0.258826659	1778	58.93	22.01	1.124047233	19.419	112.6630547	687.6	2.19452381	0.434375181	-0.049791214	1222.306208	1142.195529	1661.468817	NaN	0.571410856	258.044	0.68746131	0.442172
23/06/2018 13:00	BEVie	MF	7.542535576	0.9799	NaN	490	76.48	11.36	0.322048508	18.5325	239.5963257	192.4	2.366348143	0.535386649	NaN	348.1559635	542.9466703	764.1514043	846.2037037	0.334049667	33.7314	0.710522375	0.527970167
27/06/2018 13:30	BEVie	MF	12.97603558	1.18815	0.207439003	1894	44.8	22.48	1.555623258	17.333	243.4472532	729.3	2.537472895	0.612109801	-0.082344976	1379.814382	1396.883595	1917.430029	1015.972222	0.335176707	163.342	0.728518681	0.423175
29/06/2018 12:30	BEVie	MF	13.18079558	1.0876	NaN	1951	41.06	23.04	1.719705366	16.513	213.4551995	741.9	2.617303005	0.648206414	-0.074328087	1437.531764	1407.55542	1910.316483	NaN	0.331941373	193.32	0.736817921	0.432865
06/07/2018 12:00	BEVie	MF	16.20646558	0.5193	0.238142922	NaN	NaN	NaN	NaN	NaN	NaN	NaN	1.736598639	0.355547023	-0.038312221	NaN	933.8838498	1525.92432	NaN	0.42987608	199.674	0.612011905	0.424956
13/07/2018 13:30	BEVie	MF	11.35676558	1.163	0.168706662	703	49.49	21.69	1.355065512	15.3445	236.1189393	248.5	1.559578019	0.425815635	-0.058414664	405.5031479	1015.766701	1760.982608	NaN	0.709393177	108.653	0.576818134	0.397246125
14/07/2018 13:00	BEVie	MF	20.01959558	1.3094	0.196492511	1674	48.72	23.13	1.504559003	14.9935	196.8221662	664.6	1.551368339	0.44393759	-0.085053675	960.9131288	1019.253205	1775.633836	NaN	0.495375131	224.023	0.57402218	0.458827417
17/07/2018 12:00	BEVie	MF	7.874025576	-0.1062	NaN	890	57.44	20.04	1.029204321	13.9405	380.7246969	335.9	1.447091837	0.435084159	NaN	488.4207993	830.5750345	1513.473181	482.1388889	0.57748837	67.7067	0.548787415	0.43362
22/07/2018 12:00	BEVie	MF	17.69144558	1.1519	0.189289122	1859	48.88	21.18	1.328313232	12.7805	180.0158972	712.2	1.206488095	0.368609624	-0.04963663	915.6349583	869.854292	1766.052196	424.1527778	0.327838411	188.731	0.492541667	0.406696
17/08/2018 12:30	BEVie	MF	13.16030558	1.1822	0.33926314	320	96.74	14.49	0.055047639	10.136	32.20900822	133.8	1.032676091	0.314290013	-0.045385742	149.4923611	538.3584501	1152.398041	433.1501736	0.643525113	54.4874	0.467163628	0.276421833
21/08/2018 13:00	BEVie	MF	19.54974558	0.3825	NaN	982	63.36	22.09	1.007815913	9.796	127.3219311	381.8	1.06009708	0.326386823	NaN	478.7269658	626.4459671	1285.012092	421.9253472	0.534501548	167.245	0.487502002	0.324631667
22/08/2018 12:30	BEVie	MF	12.92694558	0.6985	0.215465465	1682	56.41	23.88	1.339452734	9.718	228.6079872	637.8	1.066774731	0.329332679	NaN	828.3090913	606.7448096	1232.082058	419.1918403	0.385383897	167.953	0.49245487	0.32958525
06/09/2018 13:00	BEVie	MF	7.112975576	1.1836	NaN	586	94.69	15.68	0.096969718	9.761	69.04726344	253.9	1.19870143	0.467803419	NaN	307.824429	133.8916626	254.8872243	411.296875	0.696721914	83.4514	0.52529766	0.816063931
13/09/2018 12:30	BEVie	MF	8.333645576	0.8136	0.172663352	196	93.29	13.08	0.103160873	9.3215	75.13441849	77.3	1.200668403	0.429746448	NaN	103.7057292	233.7641673	441.8056472	407.3834635	0.320131451	29.7114	0.529110863	0.763820667
18/09/2018 12:30	BEVie	MF	8.039065576	0.5201	0.138356066	1404	42.3	25.18	1.919767619	9.115	148.2196768	512.7	1.149175967	0.38308517	-0.055280211	743.9452835	677.559399	1278.714198	395.8709491	0.533333046	247.266	0.529875558	0.140539083
19/09/2018 12:30	BEVie	MF	13.74680558	1.0406	NaN	1388	64.15	21.68	0.961170834	9.0685	132.2384738	541.5	1.151867294	0.369294627	-0.053871771	750.9990654	665.0496471	1229.147882	383.009838	0.50186565	177.004	0.541065609	0.281316854
24/09/2018 12:30	BEVie	MF	18.10746558	0.5175	0.436059367	NaN	83.72	8.42	0.18218604	12.677	NaN	439.1	1.165323926	0.300341911	-0.069691948	NaN	549.1811964	919.8770575	318.7042824	NaN	NaN	0.597015864	0.327262333
25/09/2018 12:00	BEVie	MF	15.90168558	0.5954	NaN	NaN	64.69	9.86	0.436451913	12.4125	110.6427656	285.6	1.167959184	0.28683867	-0.058209408	NaN	648.5198184	1066.692178	306.1111111	0.481465473	89.4494	0.607972789	0.169828
28/09/2018 13:00	BEVie	MF	0.066205576	0.6229	0.316328891	191	90.81	10.13	0.115716188	11.55	182.2977963	68.9	1.201505456	0.314922521	NaN	118.8411048	63.00632185	101.2630057	286.9105903	0.205123329	14.021	0.622204737	0.715481333
30/09/2018 12:00	BEVie	MF	9.228725576	0.5923	NaN	1288	49	13.28	0.794634959	11.276	101.3000432	482.1	1.223103741	0.333003904	-0.072394832	813.2016905	728.7781768	1154.284728	274.5486111	0.484224063	175.093	0.631367772	0.25382
01/10/2018 12:00	BEVie	MF	6.532485576	0.586	0.252994898	542	86.91	7.59	0.138255475	11.124	60.46840094	232.1	1.234132653	0.34223695	NaN	344.7373486	239.4751161	376.5055149	268.2361111	NaN	64.6455	0.636046769	0.586312
15/06/2018 12:30	CHLae	MF	23.45233464	0.1392	NaN	1396.76	60.8127	18.4696	0.857426764	19.02837667	50.81676063	NaN	2.497706887	0.713378647	-0.09444537	949.2916061	1103.885768	1624.225344	966.7207755	0.703273625	275.262	0.67963831	0.449611313
20/06/2018 12:30	CHLae	MF	13.84142238	0.702	NaN	1857.99	54.735	24.8136	1.472777827	15.80011333	149.1329968	NaN	3.447359664	0.926148065	-0.100859427	1473.07533	1568.002732	1977.721938	1173.04022	0.479101776	186.579	0.792832755	0.366687333
27/06/2018 12:00	CHLae	MF	22.0514523	0.4308	0.168519903	2043.72	44.2824	21.0732	1.438102673	12.88805333	NaN	NaN	3.364583333	0.883631341	-0.076416576	1623.480075	1439.505715	1812.123639	1206.694444	NaN	313.487	0.794375	0.342728
01/07/2018 12:30	CHLae	MF	12.63175694	0.6979	NaN	1836.89	55.6697	23.9856	1.371068347	12.32159	187.3210718	NaN	3.148697917	0.771916185	-0.086583601	1422.770564	1513.27545	1953.737736	1150.41522	0.405332897	148.668	0.774554036	0.378376667
09/07/2018 13:00	CHLae	MF	17.69015227	0.8607	NaN	1836.93	37.7981	23.9741	1.922451184	14.44963333	148.7289581	NaN	2.848372396	0.481042109	-0.099862553	1368.261707	1443.868064	1938.433671	1011.397569	0.473054257	271.641	0.744863281	0.289443833
13/07/2018 12:00	CHLae	MF	23.20636342	0.2853	0.202372836	1921.78	48.1529	23.2141	1.529125015	12.74696	189.039666	NaN	2.990625	0.396972315	-0.084601271	1463.555581	1224.677358	1608.111426	1051.805556	0.327192094	198.904	0.7615625	0.321656
26/07/2018 13:00	CHLae	MF	6.597734295	1.1543	0.191085192	1907.24	35.3178	28.6589	2.652212351	12.23410333	435.1307439	NaN	2.577115885	0.409333909	-0.087174124	1378.620372	1430.273347	1978.698846	933.6041667	0.282674131	121.99	0.722835286	0.3603895
02/08/2018 12:30	CHLae	MF	17.98099829	0.9894	NaN	1807.24	57.941	26.1612	1.485149082	12.24157333	212.4885752	NaN	2.561051432	0.602565221	-0.079643585	1289.014518	1288.571946	1806.6195	838.1530671	0.317626771	166.135	0.713250326	0.347929
03/08/2018 12:00	CHLae	MF	11.10564124	1.0672	0.207739574	1738.88	50.4384	28.9229	2.064232998	12.17699	NaN	NaN	2.56640625	0.624208179	-0.086316951	1237.72935	1224.23404	1719.920504	817.9305556	NaN	213.468	0.711796875	0.2536
04/08/2018 12:00	CHLae	MF	3.174430155	1.0873	0.190713505	1821.69	42.9237	30.7798	2.65124272	12.13779667	NaN	NaN	2.571875	0.646311625	NaN	1293.969178	509.8146025	717.7328324	797.2777778	NaN	398.799	0.7103125	0.341492
16/08/2018 13:00	CHLae	MF	14.27843107	0.9961	0.266712145	1838.37	45.6163	24.7982	1.767808639	13.26318333	288.971809	NaN	2.263984375	0.415905445	-0.090387907	1266.633738	1272.721377	1847.205492	804.8929398	0.321989535	131.875	0.688998264	0.317376167
19/08/2018 12:00	CHLae	MF	14.07190777	0.2074	0.249447874	1292.58	60.0712	24.3701	1.264403715	12.67653	126.0830293	NaN	2.546875	0.592973609	-0.098197486	936.3126375	1166.065084	1609.753352	757.8472222	0.385771295	261.779	0.724375	0.255828
26/08/2018 11:30	CHLae	MF	19.65956526	0.9009	NaN	1783.82	56.3894	13.9323	0.709673102	14.99399	83.305931	NaN	2.718877108	0.915801161	-0.090046973	1322.202932	1044.45642	1409.104613	667.7640336	0.376272556	207.643	0.741219928	NaN
29/08/2018 12:30	CHLae	MF	17.01828696	0.5513	NaN	1725.83	57.2235	24.7311	1.384817522	13.73311	133.2258282	NaN	2.248414559	0.95200519	NaN	1165.310742	636.8288853	943.1461973	651.5206887	0.41573492	240.533	0.675217572	0.440044667
08/09/2018 12:30	CHLae	MF	19.80620489	0.8439	NaN	NaN	61.4637	19.6975	0.911883413	14.68897333	116.6457145	NaN	2.41280754	0.452011535	-0.067315538	NaN	1128.983407	1529.373042	725.370515	0.367534851	201.057	0.738200149	0.292119583
12/09/2018 13:00	CHLae	MF	3.599918318	0.8554	0.22501262	1579.77	43.734	26.1386	1.984102858	13.72738667	135.7418725	NaN	2.668717448	0.52679461	-0.085735466	1210.973928	1213.248577	1582.737383	720.90625	0.504128097	304.326	0.766550781	0.3318385
25/09/2018 12:30	CHLae	MF	17.17238234	0.5201	0.339203868	1561.25	57.8431	12.269	0.613799463	13.47928333	NaN	NaN	2.811283172	0.68598186	-0.094188361	1244.477186	1096.215103	1375.248858	562.8258102	NaN	162.457	0.797103082	0.249558667
30/09/2018 12:30	CHLae	MF	19.66754411	-0.2328	NaN	1086.67	68.0955	16.5907	0.618320772	13.13331667	103.6632609	NaN	2.519244482	0.658666668	-0.079585504	871.3383687	983.8762978	1227.019141	494.353588	0.317470279	178.571	0.801842665	0.3576645
04/10/2018 13:00	CHLae	MF	10.2704204	0.9337	0.300015594	1417.12	71.495	15.2756	0.506917589	15.94617	128.9212833	NaN	2.34046379	0.622720704	-0.098892013	1139.786418	1018.371317	1266.162097	445.8587963	0.314559575	95.5252	0.804297743	0.248403333
05/10/2018 12:30	CHLae	MF	11.46546531	0.206	NaN	1444.68	69.4887	17.3304	0.620381362	15.55394667	134.9314838	NaN	2.335975942	0.604230281	-0.103707674	1161.451865	992.5513362	1234.591899	438.6238426	0.295329041	130.759	0.803950955	0.31767875
09/10/2018 13:00	CHLae	MF	26.20074401	0.564	0.230807517	1245.9	80.6476	15.4187	0.347403091	14.83405	90.39088024	NaN	2.317547123	0.528301526	-0.086044341	999.8682768	534.188022	665.6325359	408.9143519	0.305446711	114.979	0.80252691	0.557284
10/10/2018 13:00	CHLae	MF	13.28867453	0.196	NaN	1312.43	71.2382	17.6507	0.597033782	14.75166667	94.88744111	NaN	2.31296379	0.50941769	-0.095454189	1052.795573	983.6506037	1226.232893	401.525463	0.403214082	154.206	0.802172743	0.3476805
12/10/2018 12:00	CHLae	MF	18.47474765	-0.0454	0.242963149	1358.07	70.1622	19.5865	0.701090914	14.56129	153.3967831	NaN	2.268010204	0.49097388	-0.087601774	1082.43087	864.0757037	1084.111072	383.1388889	0.276725562	145.859	0.797036139	0.29358
17/10/2018 12:30	CHLae	MF	19.1049741	0.1386	0.242660493	1244.2	52.1026	17.8585	1.007654774	13.86304	NaN	NaN	2.064359056	0.489232651	-0.044620112	961.7046743	795.887274	1029.674673	326.3755787	NaN	-47.1054	0.772950229	0.241822833
20/10/2018 13:00	CHLae	MF	31.04879885	0.6071	0.185833848	1065.68	77.2104	14.934	0.396267733	13.42160333	NaN	NaN	1.907028416	0.462508374	-0.081887904	800.5655184	727.2586178	968.096859	284.1721644	NaN	72.6321	0.751225057	0.297211333
19/05/2018 12:30	CZBK1	ENF	25.64097356	1.9309	0.259507059	969.892	96.575	11.1465	0.046222269	16.5134	14.63009867	462.386	2.893649554	0.768733988	NaN	711.5975165	591.1646268	805.7445803	1042.535156	0.498696823	185.79	0.733687376	0.258780417
21/05/2018 13:30	CZBK1	ENF	30.90978921	1.5917	NaN	1356.77	43.878	16.622	1.089881204	14.4558	76.68679438	581.488	2.860260107	0.79836139	NaN	991.2093211	1007.377959	1378.901676	1107.003906	0.428608692	279.338	0.730565476	0.4593615
25/05/2018 12:30	CZBK1	ENF	22.12238273	1.8079	0.294201743	767.229	53.6984	17.8037	0.970650136	13.8518	94.59469185	315.534	3.19120112	0.908635714	NaN	587.9881694	1068.153801	1393.767111	1317.922598	0.715011153	181.848	0.766378968	0.390199667
02/06/2018 13:00	CZBK1	ENF	0.943017934	2.1699	0.265093754	281.762	96.4455	15.0795	0.06240117	7.97	25.5753777	104.951	3.417895379	0.94115858	-0.078200641	223.1084039	140.8184495	177.838608	1406.503472	4.44288654	53.3293	0.791832837	0.225187167
05/06/2018 12:00	CZBK1	ENF	19.534437	1.5882	0.283771743	511.887	72.8965	19.3655	0.627955823	8.9	43.86205497	209.118	3.404761905	0.91154215	-0.070996459	404.8782414	1066.389779	1348.23512	1365.333333	0.642370355	189.647	0.790952381	0.51102
08/06/2018 13:00	CZBK1	ENF	29.10074293	1.6788	0.181577532	982.765	63.2998	20.8418	0.933572335	7.933	70.26732966	412.424	3.045193452	1.020158869	NaN	732.4104911	1326.157782	1779.468575	1231.690104	0.708051667	248.866	0.74525496	0.3001695
09/06/2018 12:30	CZBK1	ENF	0.94210266	1.5197	NaN	109.216	83.2767	18.0248	0.355606962	7.69864	NaN	22.6454	2.929441964	1.055124525	NaN	79.78710954	1195.389606	1636.300299	1188.667969	NaN	211.73	0.730544147	0.668977167
14/06/2018 12:30	CZBK1	ENF	0.929173195	0.9132	NaN	113.925	100	10.5485	0	11.287	NaN	44.4343	2.468526786	1.175897676	NaN	76.64372423	181.7579424	270.1691991	1013.783709	NaN	-10.9806	0.672755973	0.8975105
16/06/2018 12:00	CZBK1	ENF	13.42442261	0.8324	0.251803299	349.976	75.5686	16.848	0.481472763	12.0913	89.6013003	128.907	2.486904762	1.134560415	-0.046813392	236.8014694	437.9660598	647.2831867	1013.6875	1.054208131	87.8504	0.676622024	0.739412
20/06/2018 12:30	CZBK1	ENF	28.14166574	1.9391	0.230866034	1231.86	57.1899	21.1083	1.107391248	9.15524	108.5589056	528.481	2.524241071	1.050580507	-0.052067919	843.1788655	819.2634736	1196.920302	1013.492043	0.589010298	236.05	0.684476211	0.578392771
23/06/2018 13:00	CZBK1	ENF	22.89384478	1.0275	0.30789669	830.59	95.1134	7.45083	0.051111797	8.57233	31.97324864	399.058	2.111024306	0.850517373	NaN	502.5622265	105.9473411	175.1003108	NaN	0.525323349	115.755	0.605066551	0.7165935
25/06/2018 12:30	CZBK1	ENF	26.89824139	1.1557	NaN	922.849	81.7318	11.5882	0.254035488	15.8558	26.63533996	400.423	1.701643105	0.676403633	NaN	485.6342182	459.721465	873.6070859	NaN	0.760861914	199.98	0.526233672	0.309340333
27/06/2018 12:00	CZBK1	ENF	19.72134137	0.8333	NaN	319.125	85.7545	12.8882	0.216219305	14.4207	81.79483413	136.009	1.292261905	0.502289894	NaN	142.7767783	152.8924246	341.7348086	NaN	0.425403674	54.0141	0.447400794	0.649844
13/07/2018 12:00	CZBK1	ENF	12.23075941	1.3574	NaN	371.966	79.9788	14.9537	0.348582786	8.72	89.29434754	146.884	1.275297619	0.450905702	NaN	158.1630429	686.8279233	1615.273901	NaN	0.765476366	73.6301	0.425208333	0.296944
14/07/2018 13:00	CZBK1	ENF	5.267322546	1.4489	0.255826306	55.6356	91.8858	14.8942	0.140720818	8.73533	NaN	8.63031	1.01906622	0.375460079	-0.048479912	20.7529964	348.0789822	933.1463586	NaN	0.79066605	222.106	0.373016493	0.436483833
15/07/2018 13:00	CZBK1	ENF	31.20916015	1.2108	0.263560411	1683.03	62.4965	18.7637	0.836182205	9.54233	44.82176099	733.827	0.794357639	0.308700609	NaN	550.6434201	433.8352673	1326.008344	NaN	0.501077888	389.561	0.327173859	0.360264333
16/07/2018 12:30	CZBK1	ENF	21.82820331	1.7592	NaN	1519.86	53.3255	20.23	1.14235334	9.20242	68.89242901	647.801	1.053428819	0.370987457	NaN	574.9015576	476.6130963	1260.016034	NaN	0.500753363	338.66	0.378259549	0.44444775
26/07/2018 13:00	CZBK1	ENF	30.8917145	1.4427	0.259513951	998.22	79.0767	20.103	0.507998143	13.4653	70.46571655	426.205	2.973778522	0.718076743	NaN	754.1714261	656.3535147	868.748381	1118.843171	0.462742742	174.833	0.755516245	0.251627333
27/07/2018 12:30	CZBK1	ENF	12.50130513	1.219	NaN	1472.03	65.6419	22.9722	0.998276673	12.639	104.161777	654.438	2.997529142	0.686892512	-0.005008347	1118.367034	1027.717864	1352.7147	1106.345197	0.505337192	247.594	0.75974473	0.328836083
01/08/2018 12:30	CZBK1	ENF	31.43460314	0.8101	NaN	1310.21	66.8204	24.3038	1.046422125	9.12077	66.34471653	571.592	3.111821057	0.575471697	-0.065387911	1022.760178	1302.74637	1668.887152	1082.494213	0.509550523	317.638	0.780607825	0.405009083
02/08/2018 12:30	CZBK1	ENF	23.53516742	0.6329	0.231753903	1653.26	54.811	26.6043	1.638887572	8.81992	82.88959285	721.028	3.129231771	0.590465908	-0.070215338	1296.506317	1264.039922	1611.859976	1108.883102	NaN	396.544	0.784211992	0.801050083
08/08/2018 12:00	CZBK1	ENF	26.50806629	0.6887	0.174739685	1364.47	56.3116	23.7617	1.332745271	6.09148	171.3394291	627.434	3.233333333	0.680118796	-0.084246861	1099.437946	1055.010041	1309.332242	1266.666667	0.427378174	204.715	0.805761905	0.405372
12/08/2018 12:30	CZBK1	ENF	25.14107987	1.2263	NaN	1545.5	36.8036	20.7814	1.601477742	6.94228	189.8854978	628.121	3.099852608	0.651826774	-0.085372576	1234.617766	1286.707868	1610.706621	1148.945602	0.394254697	200.102	0.798846824	0.330651917
16/08/2018 13:00	CZBK1	ENF	25.50505629	0.8881	0.235866332	1314.78	55.4524	21.4478	1.177133206	6.12875	77.29091153	576.659	2.964240009	0.623455986	NaN	1040.932764	1069.60385	1350.993838	1032.029514	0.522168778	303.096	0.791716305	0.829942
17/08/2018 12:30	CZBK1	ENF	12.70162014	1.2212	NaN	1143.45	57.1328	22.2943	1.194196912	6.01197	65.57715438	481.062	2.88163531	0.614715225	NaN	897.5734287	1120.475577	1427.412797	1022.278646	0.556338421	318.921	0.784969547	0.300974111
19/08/2018 12:00	CZBK1	ENF	10.31076026	0.9634	0.212031441	1305.01	44.3016	25.3828	1.876168293	5.77175	154.1016089	529.901	2.714668367	0.59704773	-0.052758155	1006.596604	1039.133641	1347.192896	1002.569444	NaN	240.338	0.771332483	0.300656
22/08/2018 13:00	CZBK1	ENF	19.92088217	1.0761	NaN	886.059	47.9986	23.0616	1.519285012	5.47227	184.0676415	359.935	2.458066539	0.569895579	NaN	664.8760512	1188.136537	1583.391475	972.2795139	0.353665637	159.146	0.750374469	0.263447
26/08/2018 13:00	CZBK1	ENF	8.943700173	1.2343	0.492948035	202.752	100	7.475	0	5.41118	NaN	87.6657	2.402943948	0.541133357	NaN	152.1187109	105.9202951	141.1762666	913.0787037	0.086276238	-8.74319	0.750269841	0.886612667
09/09/2018 12:00	CZBK1	ENF	23.27595598	0.7818	0.304273984	1364.4	50.5828	17.1798	0.995047537	5.53954	49.57510062	560.687	1.815612245	0.44354389	NaN	903.334898	633.5564338	956.9257207	709.1111111	0.503067071	350.269	0.66207483	0.270492
14/09/2018 12:30	CZBK1	ENF	21.37829105	0.473	0.240708981	816.095	97.1556	14.4733	0.047976885	5.23465	59.98076393	356.402	1.950611182	0.489241157	-0.044730421	554.8017241	252.5985026	371.564049	685.0529514	0.2701494	84.3394	0.679824927	0.466716
17/09/2018 13:00	CZBK1	ENF	22.24158348	0.9865	0.264328378	1008.85	60.4669	18.8693	0.887404466	5.22539	200.3874826	410.774	2.027528522	0.515865939	-0.035152327	696.3906144	862.0653182	1248.860307	668.9149306	0.336905174	110.829	0.690281622	0.208677167
23/09/2018 13:00	CZBK1	ENF	6.544582217	1.2922	NaN	96.4358	88.6059	8.7735	0.130673379	5.03967	257.3620188	34.2771	1.568778522	0.445278037	-0.037484555	65.51912112	813.7531416	1197.740963	400.6649306	0.64035739	10.0912	0.679406622	0.261759
08/10/2018 13:30	CZBK1	ENF	28.92156965	1.0575	0.193345614	829.459	75.0531	14.1814	0.412726778	6.26733	73.34346004	294.689	1.244866869	0.405282807	NaN	514.1631018	121.4328136	195.8980327	290.7196181	0.299189525	123.851	0.619877657	0.2049805
12/10/2018 12:00	CZBK1	ENF	20.44715073	0.3654	NaN	948.02	54.9474	16.3743	0.860920692	5.616	175.8588156	359.372	1.088001701	0.255654063	-0.074682143	554.03103	570.3414521	975.9292785	255.6319444	0.351988639	113.271	0.584408588	0.184256
13/10/2018 13:30	CZBK1	ENF	13.441332	1.1302	0.190363536	761.131	42.9099	17.7795	1.19495152	5.442	225.7982104	241.049	1.065351297	0.245712439	-0.07079664	440.1054134	500.3432335	865.3080241	249.6922743	0.34661303	101.672	0.578225579	0.2292535
25/04/2018 12:30	CZLnz	MF	18.64344902	-0.0809	NaN	1451.55	33.4798	25.0973	2.202114007	37.674525	311.6852766	557.532	2.207970344	0.330140618	-0.05054043	1022.289085	1037.491215	1473.13553	741.3414352	0.347276691	135.573	0.704274111	0.365014917
29/04/2018 13:00	CZLnz	MF	21.76435059	-0.1165	0.083760647	1459.32	34.722	27.134	2.444025394	35.762175	218.7952929	546.031	2.537289187	0.333771539	-0.029082578	1070.496456	703.7942054	959.4249046	849.5179398	0.413833962	213.744	0.733558408	0.3951865
30/04/2018 12:30	CZLnz	MF	22.68158012	0.3704	NaN	1443.45	34.2352	25.9198	2.288577446	35.315075	232.966475	549.531	2.628852927	0.348328915	-0.090797941	1070.023095	935.9163782	1262.541437	878.3353588	0.369464857	193.113	0.741295573	0.441176583
11/05/2018 12:30	CZLnz	MF	25.80266239	0.6365	NaN	1522.57	61.2442	21.6487	1.037046429	38.354275	115.3680764	602.111	2.981937624	0.518538924	NaN	1170.025846	1195.731497	1556.021102	906.8064236	0.539261778	184.901	0.768454551	0.505795833
21/05/2018 12:30	CZLnz	MF	27.9420715	0.8893	NaN	1504.91	44.133	21.5658	1.487184192	36.293825	124.771124	605.556	1.439396081	0.360180425	NaN	731.6006873	858.7435214	1766.444093	NaN	0.491275216	233.453	0.486142485	0.3639775
26/05/2018 12:30	CZLnz	MF	23.15735674	0.3247	NaN	1655.23	53.529	24.4008	1.474340899	34.50805	126.3448131	649.852	2.765884177	0.564174126	-0.024565608	1171.045052	1141.899177	1614.033357	NaN	0.511655428	256.389	0.707481771	0.288516417
07/06/2018 12:30	CZLnz	MF	30.84238543	0.7174	0.2133327	1315.22	60.9087	23.6953	1.187644553	29.5608	106.422236	522.622	3.028213666	0.511960996	NaN	1015.189515	1410.058063	1826.788534	1064.91059	0.5659487	209.521	0.7718781	0.712158083
11/06/2018 12:30	CZLnz	MF	28.35852194	0.9252	NaN	773.701	44.5057	28.0977	2.200864748	28.95165	125.0739053	268.83	2.879523189	0.439837592	-0.105953582	584.3999486	1250.816873	1655.986226	989.0772569	0.907071411	257.081	0.755330481	0.375036111
03/07/2018 12:30	CZLnz	MF	24.61551342	0.595	NaN	1706.81	27.3817	24.3715	2.299761591	27.24835	121.1294078	662.526	2.610793961	0.579393208	-0.102418974	1219.749733	629.9734581	881.5291933	804.7693866	0.573622309	342.429	0.714637091	0.346499167
16/07/2018 13:30	CZLnz	MF	28.41124082	0.7908	NaN	742.417	47.324	24.631	1.694900408	27.336675	124.2652815	282.161	2.794440104	0.615804921	NaN	546.2370364	1242.968359	1689.378015	1075.338976	1.095467705	190.817	0.735755022	0.386868
24/07/2018 12:30	CZLnz	MF	29.61565171	0.4513	NaN	1435.91	41.7787	28.3125	2.338706804	28.422525	158.3028286	585.07	2.868975694	0.44112845	NaN	1089.244752	910.3888986	1200.13112	1157.525608	0.680521913	251.444	0.758574529	0.321155417
25/07/2018 12:00	CZLnz	MF	27.59807006	0.6499	0.194143637	1704.75	40.0842	28.072	2.372585283	28.208325	109.1088598	692.023	2.815238095	0.468310608	NaN	1281.505223	1008.195195	1341.173433	1127.069444	0.713605397	365.777	0.75172619	0.346132
26/07/2018 12:00	CZLnz	MF	31.97944736	0.3048	0.177661048	1591.07	49.6148	27.3807	1.914522952	28	110.4633495	632.34	2.760357143	0.496071111	NaN	1184.920971	818.3342883	1098.83036	1095.965278	0.611217125	311.975	0.744732143	0.284377
29/07/2018 12:30	CZLnz	MF	28.52593105	0.5639	0.155378088	1654.49	44.6542	30.1877	2.483372578	27.698325	135.9399478	662.866	2.594570933	0.579930961	-0.00359389	1197.196063	802.1814759	1108.591375	1002.004774	0.635065586	328.106	0.723604291	0.353045139
30/07/2018 12:00	CZLnz	MF	18.70094986	1.3883	NaN	1611.6	38.0298	30.2828	2.796144901	27.613325	145.0048884	637.799	2.540833333	0.60711312	NaN	1155.123893	991.107622	1382.768596	971.5486111	0.724084062	321.67	0.716755952	0.363188
03/08/2018 12:30	CZLnz	MF	25.90157703	0.6014	0.13802327	1601.13	35.2493	31.6952	3.172156324	27.288825	268.3773249	632.624	2.52578063	0.700386131	-0.055648041	1152.80268	1184.361238	1644.961747	1030.0625	0.509529634	217.454	0.71999318	0.288690417
09/08/2018 12:30	CZLnz	MF	18.7669984	0.4195	NaN	1519.13	39.3238	32.4695	3.108560174	26.688025	224.0924263	590.691	2.548924231	0.797788926	-0.027831363	1113.690988	1112.303261	1517.237071	1139.439815	0.522255764	255.182	0.733111049	0.3227265
12/08/2018 11:30	CZLnz	MF	26.76066661	0.7343	NaN	1583.43	31.0722	25.7293	2.371132994	25.849175	176.1878229	616.094	2.425748388	0.767128832	NaN	1143.64027	1062.769387	1471.460017	1028.337963	0.482547511	261.05	0.722255022	0.29373875
15/08/2018 12:30	CZLnz	MF	26.16841667	0.4142	NaN	1568.93	39.0608	24.9995	2.005374004	25.6884	174.9863811	608.241	2.299102803	0.735605073	NaN	1115.655442	484.284447	681.042165	914.1064815	0.502898433	217.144	0.711093192	0.510537
16/08/2018 12:00	CZLnz	MF	29.26815555	0.3497	0.097936995	1596.05	37.8797	26.2033	2.199120265	25.4755	135.3557983	631.378	2.258333333	0.725457014	NaN	1129.205375	890.149446	1258.161761	877.3333333	0.511357817	324.5	0.7075	0.143608
19/08/2018 12:30	CZLnz	MF	18.29277304	0.2432	0.097742319	1475.64	29.1653	31.4525	3.421705694	25.35165	313.0507982	553.551	2.118979415	0.65599203	NaN	1032.075133	1012.075389	1447.044774	918.2824074	0.47884136	206.689	0.699408482	0.36179225
21/08/2018 12:00	CZLnz	MF	24.04977511	0.0147	0.107860093	1486.35	38.7492	28.338	2.46413098	25.2655	188.3314372	574.508	2.027678571	0.610480489	-0.0673891	1031.686152	778.4989579	1121.583268	945.1111111	0.497727456	247.052	0.694107143	0.275476
22/08/2018 12:00	CZLnz	MF	22.0067688	1.3231	NaN	1447.89	36.2832	28.9622	2.65997142	25.11075	275.552357	553.952	1.981547619	0.587485184	-0.080279793	1001.112514	1091.154147	1578.115502	958.6666667	0.47958558	180.669	0.691428571	0.307188
23/08/2018 11:30	CZLnz	MF	21.53481725	-0.1896	NaN	1487.26	37.328	30.7113	2.899553072	25.0417	186.8034106	577.123	1.936377728	0.564968948	-0.069225303	1024.433319	932.320194	1353.53127	971.9398148	0.512071611	290.319	0.688805804	0.294584167
24/08/2018 13:00	CZLnz	MF	25.75538581	0.4863	0.10068219	895.656	46.3948	26.904	1.979478491	25.044375	161.922252	343.078	1.889577133	0.541965604	-0.081538684	614.5278635	767.5997193	1118.753656	984.1585648	0.690571935	204.994	0.686120412	0.420417167
28/08/2018 11:30	CZLnz	MF	28.80924578	-0.0016	NaN	1441.9	37.525	24.0602	1.941127262	24.541775	197.0853669	561.715	1.917116195	0.586477845	-0.079669005	995.9914416	817.2471433	1183.131307	831.1429398	0.477540997	192.896	0.690749318	0.37156925
30/08/2018 12:30	CZLnz	MF	26.52670578	0.55	NaN	1272.75	48.6245	25.8475	1.780030156	24.61465	209.2288952	496.971	1.931395709	0.609558267	-0.074583132	882.2060154	930.6957676	1342.705692	751.8015046	0.514652823	158.616	0.693149492	0.335422083
31/08/2018 12:30	CZLnz	MF	24.53034903	0.0695	NaN	1278.05	41.6768	23.5657	1.757848125	24.56105	312.498507	510.026	1.938389757	0.620862963	-0.030176036	887.3821772	765.7485265	1102.867433	712.9403935	0.306932676	122.615	0.694325087	0.327435583
05/09/2018 12:30	CZLnz	MF	24.96174942	-0.1358	NaN	1214.3	43.65	24.1948	1.765338874	30.907	118.2207261	473.309	1.8171937	0.502444826	-0.072666449	811.7633146	416.6617455	623.2757116	651.1548032	0.695644437	250.192	0.6685031	0.30737575
10/09/2018 12:30	CZLnz	MF	22.95325331	0.447	NaN	1289.02	40.4452	24.3297	1.881228917	28.21075	135.1651688	489.449	1.699408482	0.407180819	NaN	827.1682421	832.0403091	1296.6124	625.3697917	0.657206298	240.04	0.641703187	0.265392
13/09/2018 11:30	CZLnz	MF	31.13469201	1.2144	NaN	1292.55	51.242	26.1692	1.722530288	27.4691	129.4941091	504.754	1.725293899	0.502469988	-0.072045198	829.0351425	590.2132478	920.2024068	618.7135417	0.533695236	270.164	0.641395027	0.30494125
30/09/2018 13:00	CZLnz	MF	21.74400903	0.8145	0.161489015	1055.8	38.6577	14.8803	1.062856652	24.89015	130.8347946	377.643	1.34546627	0.756663729	-0.087456373	641.4338504	726.8676338	1196.423992	290.6235532	0.426698956	150.824	0.607533482	0.297960833
06/10/2018 13:00	CZLnz	MF	18.12644298	0.3781	0.132826419	950.213	44.3225	21.4427	1.470761675	24.662575	206.5848583	331.79	1.415693913	0.822733696	-0.081405401	598.279897	630.4104015	1001.244003	286.4713542	0.552764539	123.43	0.629627144	0.341319
08/10/2018 12:30	CZLnz	MF	23.8691851	0.0423	0.114074759	942.167	58.3495	17.7418	0.869669839	24.726	111.7328124	344.711	1.406849933	0.854182813	-0.07501575	592.6058264	304.8800235	484.7200016	285.4405382	0.502159029	143.389	0.628981727	0.263068333
11/10/2018 13:00	CZLnz	MF	17.49377868	0.688	0.113854029	874.167	45.5367	22.3998	1.527230233	24.6614	174.5815307	295.113	1.390919785	0.898310342	-0.089219705	548.4451561	654.9466838	1043.919837	283.4832176	0.547697497	154.592	0.627391741	0.272075
12/10/2018 13:00	CZLnz	MF	15.29422798	0.268	NaN	845.952	43.1745	21.782	1.53328541	24.67565	327.6358052	281.758	1.328096655	0.821230286	-0.085720192	518.1867377	568.351978	927.8479312	273.7471065	0.400535147	85.0848	0.612548629	0.2302575
24/03/2018 12:00	CZRAJ	ENF	10.46456954	0.3398	NaN	896.107	52.2982	3.6505	0.380800779	24.3406	631.9861135	377.405	NaN	NaN	-0.013291345	NaN	NaN	1269.329517	NaN	0.077480852	16.6543	NaN	0.17526
30/03/2018 12:00	CZRAJ	ENF	15.26351567	0.0988	0.235501254	725.147	60.0369	7.532	0.420378273	24.9768	403.5124271	323.767	1.120187075	0.499642852	NaN	349.9996607	510.7451466	1058.187628	292.4583333	0.121168316	26.152	0.482660289	0.266675
02/04/2018 12:30	CZRAJ	ENF	18.04361516	-0.0118	0.254730983	1111.79	52.0926	6.5	0.468704606	27.4422	136.6374953	529.76	1.349353919	0.687987407	NaN	590.7907256	765.2461125	1440.091962	302.7219329	0.23975686	84.0817	0.531386976	0.219793417
03/04/2018 12:30	CZRAJ	ENF	16.7307092	0.2243	NaN	1396.38	50.3757	13.3795	0.778352678	27.798	209.6146455	604.845	1.399974667	0.692858181	NaN	757.4685673	691.1369858	1274.098895	321.3747106	0.272277722	100.871	0.542451601	0.485636917
22/04/2018 13:00	CZRAJ	ENF	14.444731	1.48055	NaN	1179.86	48.4194	19.6562	1.217353769	25.7819	312.4487455	517.414	2.254010771	0.591262847	-0.081551686	856.7907632	1166.08869	1605.784587	524.4965278	0.313535218	107.367	0.726180024	0.225404333
29/04/2018 12:30	CZRAJ	ENF	15.87238859	1.4417	0.119395671	1580.88	45.4681	22.5373	1.542275021	23.8481	266.4911781	682.927	2.719990522	0.625103628	NaN	1213.04373	932.2095306	1214.887284	654.6484375	0.319347633	142.255	0.767321827	0.204637083
05/05/2018 12:30	CZRAJ	ENF	16.87125902	0.8982	NaN	1614.04	46.6853	16.219	1.008539203	21.6105	319.6181982	705.397	3.190450769	0.689423306	-0.07654324	1277.537179	1323.336353	1671.90266	822.734375	0.224300442	84.0744	0.791515191	0.169633583
06/05/2018 12:00	CZRAJ	ENF	14.41900409	1.8481	0.126043061	1700.12	37.8491	15.0245	1.087148472	21.227	382.4683028	744.074	3.190654762	0.680818991	-0.088002749	1345.695579	1330.032615	1680.331782	819.3888889	0.206289364	73.76	0.791529762	0.248292
14/05/2018 13:00	CZRAJ	ENF	12.8847644	2.1235	0.145032865	1554.39	37.0537	17.695	1.310370006	19.5756	431.9907865	677.85	3.153420966	0.712623461	-0.043522267	1216.531203	1249.687218	1596.754207	823.2896412	0.237422757	78.6909	0.782642196	0.215414
21/05/2018 12:30	CZRAJ	ENF	15.22383463	1.8014	NaN	1711.38	42.4839	16.5082	1.108714957	22.1438	494.9240064	751.776	3.02629485	0.969496791	-0.075945543	1290.972768	1339.051981	1775.11628	915.4483507	0.175823735	63.6205	0.754346065	0.196032167
22/05/2018 12:00	CZRAJ	ENF	20.35421405	1.997	0.12872501	1447.59	54.9067	18.963	1.018291201	21.9515	176.7884078	629.67	3.012083333	0.97926827	-0.004672897	1089.07021	1215.670292	1615.866582	935.5416667	0.30946616	144.426	0.752333333	0.268044
28/05/2018 12:00	CZRAJ	ENF	16.22861014	1.9568	0.123756854	1362.65	51.22	23.7978	1.491376363	20.0653	226.3703279	604.874	2.925	1.039144566	-0.091587826	1008.361	1361.12682	1839.360567	1058.666667	0.328563783	159.613	0.74	0.26044
05/06/2018 13:00	CZRAJ	ENF	1.997527184	2.1904	0.17350103	46.202	78.0628	18.1735	0.470956539	17.5994	214.205094	4.92888	3.23343378	0.930092697	NaN	35.62770632	1246.660836	1616.669438	1020.956597	0.625825171	30.1756	0.771129092	0.982476194
10/06/2018 13:00	CZRAJ	ENF	12.00889158	2.5972	0.142021053	873.11	49.7477	24.544	1.608338131	16.3188	225.8674872	367.559	2.67405878	1.09546336	-0.093320783	604.4841311	1283.036706	1853.203617	975.7482639	0.388487045	144.692	0.692334449	0.3955265
20/06/2018 13:00	CZRAJ	ENF	15.17422644	1.4702	NaN	821.585	47.0796	22.4128	1.485164879	15.3789	427.3803451	366.151	2.386476935	1.255516052	NaN	526.049648	749.7693271	1170.990675	762.3958333	0.37162196	80.1706	0.640286334	0.547303667
21/06/2018 12:30	CZRAJ	ENF	9.712244147	1.5387	0.104405728	1763.84	40.7021	26.67	2.159102149	15.173	225.6162398	781.944	2.390302993	1.262326884	-0.058283429	1127.633039	1085.430081	1697.826267	NaN	NaN	213.305	0.639305742	0.279906333
22/06/2018 12:30	CZRAJ	ENF	13.04555869	1.7213	NaN	350.836	54.1439	11.3218	0.626261727	15.0134	165.3153736	132.397	2.290560929	1.182867776	NaN	220.2182214	542.3664888	864.059696	NaN	0.630934241	67.2427	0.627695623	0.6341545
27/06/2018 12:30	CZRAJ	ENF	16.53611666	1.2865	0.17893612	1509.92	60.5063	16.2455	0.748383825	14.6472	190.1308076	667.187	1.791850612	0.785572237	NaN	860.1184196	351.1162722	616.3773147	NaN	0.280147136	109.442	0.569645027	0.61996825
30/06/2018 11:30	CZRAJ	ENF	20.56687852	1.4005	NaN	1743.15	51.1258	13.9772	0.79770285	15.4866	206.0674944	786.203	1.711400463	0.630466842	NaN	989.2176298	315.149468	555.340684	NaN	0.210387933	108.184	0.567488529	0.523724083
01/07/2018 13:00	CZRAJ	ENF	22.06934527	1.7509	0.202449909	1273.29	39.1981	13.938	0.989800989	15.3498	246.0374469	580.269	1.838310185	0.632807874	NaN	751.3461022	245.41391	415.897649	NaN	0.301709099	102.388	0.590082465	0.563132
03/07/2018 12:30	CZRAJ	ENF	8.417518967	1.1588	NaN	1767.68	29.8019	20.6385	1.762969564	14.9749	239.473716	768.92	2.074710648	0.637168619	-0.017266897	1117.472867	692.9573083	1096.157957	NaN	NaN	170.035	0.632169209	0.224954167
07/07/2018 12:30	CZRAJ	ENF	14.35328268	1.7107	0.159454644	1805.86	30.3952	20.6435	1.748620228	14.2617	191.0012304	767.356	2.547753906	0.645865529	-0.022600583	1293.794893	1028.459525	1435.508771	NaN	NaN	205.252	0.716442522	0.59193
21/07/2018 13:30	CZRAJ	ENF	8.260771074	0.8113	0.168721122	475.207	36.2122	25.18	2.122318075	13.0746	NaN	177.738	1.788271019	0.94412592	-0.077902425	267.4326394	846.284716	1503.782118	NaN	0.39402477	44.3058	0.562770833	0.479021125
25/07/2018 12:00	CZRAJ	ENF	14.14289277	1.6399	0.162143295	1559.18	50.1598	23.5908	1.504497226	12.2654	269.0331851	667.098	2.149384921	1.037821768	NaN	941.9179622	815.6020306	1350.086127	637.7083333	NaN	142.876	0.604111111	0.481768
26/07/2018 11:30	CZRAJ	ENF	9.8622733	0.932	0.223592011	531.431	71.3128	19.7905	0.682842726	12.2093	67.37649841	209.497	2.310413153	1.032802588	-0.090686141	333.6476358	599.0849911	954.2172691	696.8051215	1.533567038	158.494	0.627828704	0.219444354
28/07/2018 13:00	CZRAJ	ENF	11.17087307	1.2363	0.224784748	1638.77	50.7126	26.1838	1.742769229	12.0964	232.7387741	696.302	2.649600281	1.022230274	-0.047892267	1110.737063	1115.85051	1646.314328	821.2855903	0.36153635	190.987	0.677787037	0.209746833
29/07/2018 12:30	CZRAJ	ENF	5.029808789	1.6543	0.195334877	1412.37	48.9526	25.8325	1.767056497	12.0408	547.6404456	576.104	2.810628514	1.017211095	-0.023708745	990.7840938	888.4993609	1266.562362	880.3823785	0.19945062	87.1021	0.70150463	0.179488708
01/08/2018 13:00	CZRAJ	ENF	7.398590916	0.9522	NaN	1332.13	47.8642	26.8262	1.916238972	11.758	650.1924681	547.536	3.193438947	0.928667923	-0.015150234	1016.112416	1394.429158	1828.105715	997.1495949	0.189683033	72.075	0.762772714	0.412608333
02/08/2018 13:00	CZRAJ	ENF	6.528287171	0.9782	0.121422846	1585.36	40.8048	28.7033	2.433620645	11.6788	452.5321642	692.369	3.248473669	0.853405822	-0.083692468	1229.554251	1058.857519	1365.267417	994.573206	0.253448082	130.874	0.775567853	0.190784833
04/08/2018 12:00	CZRAJ	ENF	6.768099396	1.0618	NaN	1032.54	32.7094	28.4192	2.720203001	11.4998	NaN	420.674	3.35625	0.70601754	-0.0845215	826.6773375	1338.295567	1671.56355	989.5277778	0.119802972	45.4967	0.800625	0.206408
15/08/2018 12:00	CZRAJ	ENF	12.69428914	0.7974	NaN	1403.09	48.1579	20.4595	1.287357836	10.7083	421.1495718	589.671	2.849652778	0.559463411	NaN	1079.892116	634.7862257	824.7696157	968.625	0.155559848	76.1822	0.769652778	0.32298
18/08/2018 13:00	CZRAJ	ENF	6.425218463	0.7326	0.098752482	969.464	28.5812	27.2868	2.698537335	10.5786	NaN	373.948	2.79510272	0.600658214	-0.035764472	748.2776747	1019.20088	1320.470455	929.3828125	0.092011694	24.959	0.771846788	0.190147667
29/04/2018 12:30	CZStn	DBF	10.99157654	0.7049	0.136994001	1454.21	48.6845	23.309	1.522343074	34.1533	338.1944859	530.143	2.178691539	0.367165714	NaN	994.6156602	719.4296616	1051.865409	581.7949942	0.301127077	90.5911	0.683956004	0.335314417
01/05/2018 12:00	CZStn	DBF	17.70017691	0.6646	0.143804676	1401.8	62.678	16.7535	0.731009506	33.1012	163.8267048	528.006	2.505153061	0.388922204	-0.042709867	1007.549114	1038.242606	1444.503762	627.6319444	0.346879875	97.8818	0.718753827	0.216272
03/05/2018 13:00	CZStn	DBF	17.58341201	1.6191	0.110879923	1370.11	40.5558	24.5317	1.901096639	32.0151	258.4148472	478.902	2.841923895	0.411365741	-0.093244836	1033.954235	1206.549174	1598.818433	674.9163773	0.387309047	156.914	0.754650528	0.124150167
20/05/2018 13:00	CZStn	DBF	13.55593733	1.4514	0.259327204	1150.25	45.4757	19.5962	1.28193293	36.8362	137.4648665	397.017	1.659071181	0.985113918	NaN	616.1875271	764.2342829	1426.611941	653.2378472	0.601263514	164.84	0.535698785	0.266542
21/05/2018 12:30	CZStn	DBF	23.31346295	1.1021	NaN	1437.36	41.433	19.8883	1.402745955	35.8096	107.4765136	531.584	1.67641059	1.09010893	NaN	765.4472276	663.3675529	1245.674361	705.8272569	0.463440043	272.696	0.532536892	0.246266333
22/05/2018 12:00	CZStn	DBF	13.71007692	1.1034	0.160106083	1128.85	64.8517	18.7735	0.78416167	35.1359	104.9168174	425.403	1.69375	1.195103942	NaN	597.5849688	825.9414173	1560.219915	758.4166667	0.613775035	131.405	0.529375	0.29864
31/05/2018 12:30	CZStn	DBF	11.97383035	1.7023	0.189000839	1691.61	45.8898	24.491	1.726205801	35.3239	320.6670762	634.885	1.841356647	1.392283402	-0.043383149	923.251118	889.5634223	1629.886335	1054.737847	0.481827864	99.8038	0.54578249	0.29282025
02/06/2018 12:00	CZStn	DBF	17.0741033	1.0628	0.232811505	701.123	70.6275	21.8628	0.796548166	34.0192	85.99328754	262.03	1.868452381	1.099949252	NaN	399.0975743	736.0568671	1293.083276	1037.75	0.837002805	140.585	0.56922619	0.321304
07/06/2018 12:00	CZStn	DBF	27.49233835	0.7314	0.215666005	931.941	73.2163	20.9067	0.684105736	36.2587	60.81379695	337.873	1.932142857	0.881532898	-0.026142086	554.338477	1069.872153	1798.644268	958.5	0.618928871	212.456	0.594821429	0.33791375
11/06/2018 12:30	CZStn	DBF	28.80949719	1.2804	NaN	1652.42	57.067	24.4782	1.368562206	33.3592	57.43676155	627.6	1.977616567	1.333274877	NaN	949.8720391	752.8864882	1309.739249	850.9427083	0.650478829	436.751	0.57483693	0.237364917
12/06/2018 12:00	CZStn	DBF	3.032773706	0.5226	0.2471973	475.229	89.8307	19.0783	0.231337927	33.022	44.41888452	194.937	1.988690476	1.443284582	NaN	270.8663863	344.5965945	604.5869969	824.75	0.566326823	102.941	0.569970238	0.28704
21/06/2018 12:30	CZStn	DBF	17.83710973	1.7599	0.131710579	1708.56	56.8295	26.059	1.51501141	28.1198	131.6011283	656.499	NaN	NaN	NaN	NaN	NaN	1533.297852	NaN	0.567028584	217.515	NaN	0.322905083
27/06/2018 12:30	CZStn	DBF	7.27816636	1.2555	NaN	628.707	60.734	19.355	0.909138637	28.8334	83.97950679	249.554	NaN	NaN	NaN	NaN	NaN	465.7758502	NaN	0.93024224	163.111	NaN	0.654898
29/06/2018 12:00	CZStn	DBF	10.85981908	0.4507	0.222559208	617.302	72.33	22.4545	0.778549711	29.2146	36.02162019	251.417	NaN	NaN	NaN	NaN	NaN	485.7833782	NaN	1.084371952	265.05	NaN	0.910212
30/06/2018 13:00	CZStn	DBF	12.49955743	1.3089	NaN	1116.35	62.7237	12.9898	0.569644873	29.0438	45.88117656	451.788	NaN	NaN	NaN	NaN	NaN	307.9563982	NaN	0.48436942	234.63	NaN	0.349500833
03/07/2018 12:30	CZStn	DBF	20.08237657	0.4613	NaN	1733.57	39.2962	19.9645	1.460962732	28.0207	113.6828433	655.769	NaN	NaN	NaN	NaN	NaN	1189.618235	NaN	0.490770302	258.713	NaN	0.222117083
08/07/2018 12:30	CZStn	DBF	17.6412415	0.9687	NaN	1326.12	52.3118	21.0667	1.230356892	26.2632	45.15393214	512.881	2.60859375	0.398668276	-0.04590575	928.0767938	1051.741596	1502.823445	NaN	0.767743232	424.01	0.69984375	0.199679167
09/07/2018 12:00	CZStn	DBF	23.41145222	-0.6501	0.170108583	1584.9	43.4963	23.7395	1.721332105	26.0931	78.90090634	595.875	2.425	0.441941738	NaN	1060.2981	1001.093884	1496.403415	NaN	0.646144556	384.131	0.669	0.393092
14/07/2018 12:00	CZStn	DBF	30.49158807	0.2564	0.169067983	1812.84	48.8825	23.1678	1.503299724	25.2134	58.94715412	715.186	1.4875	0.662912607	NaN	927.26766	168.5683747	329.5569399	NaN	0.623736399	465.482	0.5115	0.953365
19/07/2018 12:00	CZStn	DBF	31.83435939	0.3482	NaN	863.391	84.8278	19.9327	0.364415427	24.0781	29.13240014	353.488	1.655	0.917552715	NaN	466.23114	93.71209986	173.5409257	NaN	0.710496444	200.547	0.54	0.966344
21/07/2018 13:30	CZStn	DBF	17.33337705	0.0702	NaN	913.229	44.5133	25.5055	1.883018682	23.8735	148.3763762	327.176	1.838046875	1.0260639	NaN	521.3966822	945.2187041	1655.555475	NaN	0.804471458	201.646	0.5709375	0.269106
02/08/2018 13:00	CZStn	DBF	14.72311427	0.4189	0.217104744	1658.73	46.8433	29.7477	2.324332071	21.818	176.6300794	646.681	2.481463294	0.858653645	-0.021159511	1137.473892	1139.179376	1661.217036	924.9479167	0.473687119	265.747	0.685749876	0.169984333
04/08/2018 12:00	CZStn	DBF	7.767467137	1.0051	NaN	859.136	46.9107	27.9358	2.085276704	20.9147	175.9829	289.957	2.695714286	0.903324989	NaN	612.942397	1202.500669	1685.495439	993	0.567361152	231.851	0.713440476	0.180012
07/08/2018 13:00	CZStn	DBF	14.97814163	0.4808	0.203786313	1529.24	38.3705	27.669	2.382495928	19.9429	174.2443246	556.446	3.028487103	0.972708139	-0.074219251	1156.792498	1314.548351	1737.787826	1098.697917	0.543274114	271.153	0.756449281	0.150297333
08/08/2018 12:30	CZStn	DBF	12.5931662	0.2068	0.176544918	1444.22	52.712	27.353	1.793859505	19.7086	212.2816459	554.651	3.130902778	0.994924839	-0.052368586	1111.748521	585.3808308	760.4405921	1131.399306	0.477073385	160.456	0.769791667	0.331097667
09/08/2018 12:30	CZStn	DBF	9.108210827	-0.3491	NaN	1408	49.6455	28.5985	2.057341843	19.5126	237.6742124	529.912	3.014236111	1.012025122	NaN	1069.786667	1222.417199	1608.884715	1102.565972	0.47211125	164.146	0.759791667	0.169604583
10/08/2018 12:00	CZStn	DBF	16.0841584	0.1652	0.157991676	633.242	62.3922	26.0782	1.321328568	19.3279	224.1687594	244.391	2.9	1.02876915	-0.008842105	474.9315	1166.743294	1555.657725	1074.333333	0.652616419	100.961	0.75	0.32492
13/08/2018 13:00	CZStn	DBF	16.09053007	0.1759	0.212829583	1530.63	56.9987	26.1227	1.514894848	19.7466	140.116796	570.531	2.545138889	1.080782512	NaN	1101.415838	1116.278746	1551.284882	986.6319444	0.526240366	209.681	0.719583333	0.198326833
14/08/2018 12:30	CZStn	DBF	26.74640427	0.1475	NaN	1268.79	66.5062	22.994	0.974478332	19.7033	89.05306881	481.866	2.430902778	1.097526539	NaN	900.5765688	497.1952691	700.4805669	958.3993056	0.520730628	222.453	0.709791667	0.1617505
22/08/2018 13:30	CZStn	DBF	10.96485758	0.5488	NaN	1392.15	38.3415	27.9713	2.426992617	18.5077	290.7290356	496.811	1.255260417	0.519507505	-0.03618724	700.3529609	758.828751	1508.387206	941.2447917	0.352726224	172.396	0.503072917	0.22312775
27/08/2018 13:30	CZStn	DBF	13.38501726	0.3598	0.300908092	1338.16	54.529	18.7125	1.010511744	17.948	116.5048147	478.179	1.836098958	0.376395884	NaN	794.7074365	442.2035516	744.5999337	826.6510417	0.399498168	206.344	0.593880729	0.47213775
05/09/2018 12:30	CZStn	DBF	14.68342783	-0.084	NaN	970.564	58.6571	19.0257	0.937344299	21.3667	69.23364281	382.132	3.070593502	0.449639629	-0.019490255	791.6228942	415.5288367	509.4563748	591.5679977	0.562819867	250.295	0.815631833	0.549777417
09/09/2018 13:00	CZStn	DBF	20.18919025	0.2647	0.24299793	1265.37	49.8907	21.2977	1.311700185	20.7185	119.9536651	449.222	2.883698537	0.437719163	NaN	1005.893438	1047.730779	1317.999548	562.5630787	0.504447028	210.478	0.794940166	0.300565
10/09/2018 12:30	CZStn	DBF	20.25056047	0.4427	NaN	1220.54	51.0018	21.3333	1.285481032	20.5189	117.3449418	446.032	2.88109034	0.420154262	NaN	971.9546812	1070.601326	1344.416327	573.1843171	0.525362128	209.309	0.79633169	0.16180025
12/09/2018 13:30	CZStn	DBF	12.22112782	0.2301	0.147900398	1177.19	41.9168	24.2433	1.82505551	20.1358	236.4203569	399.83	2.875651972	0.383529574	-0.036685262	940.8492906	1001.691931	1253.316271	595.3307292	0.536206976	140.083	0.799233166	0.167013
25/09/2018 13:00	CZStn	DBF	16.20933922	0.4663	0.372529048	799.218	78.6395	7.501	0.224207749	17.8132	66.20625087	305.494	2.790367063	0.586177173	-0.026036765	660.7078912	335.9380038	406.3636943	291.6435185	0.287781229	79.0331	0.826692956	1.001688458
27/09/2018 12:30	CZStn	DBF	23.55472978	0.3825	0.246773066	983.518	54.7168	15.4468	0.814398722	17.956	141.0514458	364.162	2.739945437	0.616440832	NaN	812.0709569	399.4193676	483.7460745	290.5439815	0.391868368	122.462	0.825679812	0.801107333
01/10/2018 12:30	CZStn	DBF	6.784400083	0.0326	NaN	679.274	85.2888	10.109	0.184970303	17.8118	158.1033863	217.501	2.638040675	0.677605278	NaN	559.4719339	443.5701464	538.5536778	288.3217593	0.337192044	24.1269	0.823632192	0.66137175
03/10/2018 12:00	CZStn	DBF	3.908961566	0.3169	0.208625459	177.26	96.498	6.87767	0.035185658	17.8261	NaN	67.2478	2.587619048	0.707868937	NaN	145.8174524	473.8102561	575.9777353	287.2222222	NaN	28.1423	0.822619048	0.677048
05/10/2018 13:00	CZStn	DBF	12.67870012	0.2059	0.238482209	990.387	65.4523	13.3748	0.541707648	17.8924	147.8545912	326.519	2.375483631	0.646391338	-0.103827345	791.4336774	849.7299682	1063.338013	281.9195602	0.309869328	79.3241	0.799115575	0.161203833
08/10/2018 12:00	CZStn	DBF	17.77037698	-0.0698	0.179478205	1009.37	74.5942	17.1128	0.509347347	17.7324	113.2282862	349.456	2.068103741	0.557311553	NaN	772.2281315	339.3151644	443.5147251	274.2361111	0.321610494	117.877	0.765059524	0.351012
12/10/2018 12:30	CZStn	DBF	4.819318168	0.3585	NaN	936.282	60.668	18.347	0.853853346	17.3346	201.8277427	303.848	1.713781711	0.460913312	-0.100418237	676.6477736	705.324957	975.9628083	255.6548032	0.304921085	87.9683	0.722696553	0.14534375
29/04/2018 13:00	DEHai	DBF	17.55896204	1.598	0.190933791	1388.44	60.08	18.0133	0.848237662	30.29	118.6847832	NaN	2.390009301	0.360784281	NaN	945.6578063	608.7396382	893.7677643	609.8729745	0.632942227	121.602	0.68109375	0.248212167
30/04/2018 12:30	DEHai	DBF	15.81323626	1.8283	0.163333476	1622.24	53.4767	13.35	0.72827863	29.84	83.3469274	NaN	2.575919829	0.372661192	NaN	1143.417276	649.7388159	921.8264574	633.8149595	0.698476185	143.095	0.704838542	0.505335833
02/05/2018 13:30	DEHai	DBF	19.76825849	1.5393	0.184524639	851.433	54.4333	10.6767	0.595596203	28.69	81.09505769	NaN	2.963563058	0.397425816	NaN	642.2775966	775.215165	1027.661212	683.7365451	0.741378439	117.292	0.754348958	0.38713575
11/05/2018 12:30	DEHai	DBF	19.64018298	1.8653	NaN	711.888	58.97	14.31	0.684618507	24.79	164.4837599	NaN	3.020714906	0.801491755	-0.026680896	544.4132141	999.1631992	1306.530175	742.8125	0.35301564	82.8521	0.764745598	0.568912417
13/05/2018 12:00	DEHai	DBF	26.51768081	2.2844	0.191827306	1415.76	64.7833	20.3433	0.868118517	24.21	60.66030733	NaN	3.018958333	0.808778479	NaN	1079.782455	297.5436795	390.1252866	766.5555556	0.543868341	288.7	0.7626875	0.7677
14/05/2018 13:00	DEHai	DBF	13.85756449	2.5817	NaN	1606.74	38.7867	21.4967	1.622470876	23.81	221.96116	NaN	3.062268105	0.761081519	-0.070661779	1230.536294	1377.704402	1798.900837	789.587963	0.354444164	141.912	0.765859003	0.3405355
21/05/2018 12:30	DEHai	DBF	17.68893408	1.9846	0.185326948	1740.81	39.89	18.2833	1.299596786	23.96	207.7555554	NaN	3.184735243	0.571356569	-0.08724537	1332.857019	1411.575995	1843.622814	945.4292535	0.291235306	132.893	0.765653356	0.3448365
22/05/2018 12:30	DEHai	DBF	16.85093024	2.1075	NaN	1752.83	44.0967	20.5333	1.394685634	23.63	204.1351803	NaN	3.06202691	0.652762276	NaN	1310.557923	174.1201598	232.8802371	969.0334201	0.327863273	144.49	0.747681134	0.642846083
31/05/2018 13:00	DEHai	DBF	19.148909	2.7589	0.232297356	1171.67	62.1033	24.0633	1.177692147	22.24	271.9249501	NaN	2.410500579	1.049574719	NaN	771.4379022	911.7957723	1384.847373	1153.637153	0.411525901	86.9746	0.658408854	0.330793167
01/06/2018 12:30	DEHai	DBF	30.4903155	2.1129	0.215178637	1504.14	67.52	20.7767	0.822841308	22.06	155.1527546	NaN	2.436951678	1.020625988	NaN	999.145233	702.7353206	1057.916577	1167.631076	0.348465316	114.881	0.664263455	0.541570917
10/06/2018 13:00	DEHai	DBF	27.22964712	2.3535	NaN	1063.26	66.47	21.4133	0.88408971	21.92	171.4217169	NaN	2.664234044	0.926756368	-0.006913116	762.6394089	1150.385355	1603.849366	933.0286458	0.43739547	111.933	0.717265212	0.367947167
11/06/2018 12:30	DEHai	DBF	26.75242444	2.7882	0.171853056	765.996	79.9967	17.2167	0.403742821	21.23	108.8587196	NaN	2.687498967	0.931373457	NaN	553.7677399	768.4910343	1063.010746	876.4205729	0.37682473	83.8172	0.722938161	0.643821
01/07/2018 13:00	DEHai	DBF	12.26026981	2.381	NaN	1825.66	30.6267	17.71	1.445560124	18.71	271.7853259	NaN	3.316526331	0.551391179	-0.082340959	1438.142497	1557.401798	1977.05455	901.1420718	0.229531468	115.287	0.787738405	0.305708667
03/07/2018 12:30	DEHai	DBF	12.78802056	1.1711	0.103853683	1842.36	25.99	21.8367	2.003797452	18.51	438.5031507	NaN	3.154825666	0.629764885	-0.080411209	1418.768274	1469.88665	1908.740432	773.9668692	0.227803135	99.719	0.770082	0.320429083
07/07/2018 12:30	DEHai	DBF	21.42481791	2.5223	0.182050176	1816.97	37.95	19.7767	1.475686417	18.19	NaN	NaN	2.830679047	0.787046937	-0.079720341	1334.971785	1400.286017	1905.866261	519.1833044	NaN	203.757	0.734724175	0.233794917
13/07/2018 12:30	DEHai	DBF	14.58915878	1.3574	0.207519959	1835.01	41.0533	22.5667	1.670181173	18.24	190.3174349	NaN	3.106244523	0.703426748	-0.079755825	1422.658802	1432.322775	1847.475032	779.9749711	0.375616103	178.403	0.775286675	0.278017833
21/07/2018 13:30	DEHai	DBF	5.649653934	0.5401	0.117795118	237.673	68.9667	18.75	0.691315939	17.51	548.7046944	NaN	3.11125744	0.748700656	NaN	183.6409878	149.7309365	193.7857191	639.3298611	2.148668222	19.4332	0.772662388	0.75107475
08/05/2019 12:30	DEHai	DBF	7.705163029	1.2631	0.210028555	389.7	82.133	8.377	0.199349526	31.34	72.34458145	NaN	2.896552668	0.586534763	NaN	294.4547463	248.3376618	328.665739	NaN	1.057197263	39.62565543	0.755593396	0.714334333
17/05/2019 13:00	DEHai	DBF	13.89461663	2.0577	NaN	539.333	66.453	11.513	0.464131414	31.27	211.9818409	NaN	2.265315334	0.897485532	NaN	335.9963109	684.27771	1098.385721	592.4904514	0.391009231	40.56150924	0.622984892	0.71539
24/05/2019 12:30	DEHai	DBF	16.62119948	2.1513	0.246837246	1202.667	34.86	19.113	1.485131	31.653	344.2852699	NaN	2.434761905	0.799661661	NaN	786.0599298	483.3447222	739.5145396	454.786169	0.321114156	82.89205988	0.653597321	0.386272833
03/06/2019 13:00	DEHai	DBF	21.29687168	2.1097	0.180407514	1632	32.463	27.993	2.661820598	25.06	224.7119474	NaN	3.435367063	0.436834204	NaN	1320.273766	853.400001	1054.893945	753.9554398	0.463043122	223.3802865	0.808991278	0.326854167
08/06/2019 13:00	DEHai	DBF	23.96883095	2.1273	0.260259798	895	48.403	14.513	0.87258177	21.597	122.9923619	NaN	3.048289931	0.548026539	NaN	681.0692325	875.3939085	1150.364032	943.9496528	0.428821961	132.6550229	0.760971209	0.717325833
10/06/2019 12:00	DEHai	DBF	27.85694999	2.2025	NaN	1654.667	51.43	22.557	1.375341696	20.937	95.92337828	NaN	2.723125	0.630698531	NaN	1195.61756	801.5057279	1109.238541	970.9583333	0.583777082	279.497395	0.722572917	0.309112
13/06/2019 13:00	DEHai	DBF	23.58498984	2.222	NaN	986.333	54.45	19.397	1.057457059	30	54.53769326	NaN	2.231237599	0.755682093	-0.02585662	655.420052	1151.627756	1733.069435	1011.600694	0.710598195	315.3241378	0.664501798	0.554228167
14/06/2019 12:30	DEHai	DBF	16.82678203	2.2829	0.273083365	976.667	35.93	24.887	2.093989073	30.47	216.502387	NaN	2.377821181	0.716604086	-0.032907889	666.2520033	1151.837412	1688.492619	994.3836806	0.782927647	156.1119609	0.682169054	0.318571
24/06/2019 13:00	DEHai	DBF	20.72365833	1.3476	NaN	1743	38.583	24.793	1.995801068	22.403	194.0398759	NaN	3.386861359	0.465651664	-0.028603629	1401.725182	1467.933227	1825.327565	955.9039352	0.506958127	189.319072	0.804202629	0.251304333
28/06/2019 13:00	DEHai	DBF	23.25873089	3.531	NaN	1766.667	47.22	19.24	1.21311569	19.577	124.3917035	NaN	3.33983755	0.501924287	-0.080891333	1411.714593	1539.978289	1927.180492	1066.681713	0.407075821	210.6975431	0.799083581	0.274043667
29/06/2019 13:00	DEHai	DBF	20.14331859	2.4775	NaN	1766.667	31.057	24.887	2.253252515	19.3	170.9863116	NaN	3.324197491	0.510589605	-0.086500284	1408.695348	1577.191551	1977.980739	1090.217593	0.518093332	249.4813072	0.797374575	0.2383985
01/07/2019 12:00	DEHai	DBF	30.55545031	1.9128	NaN	1558.667	38.797	22.667	1.7449398	18.883	165.8890651	NaN	3.118622449	0.509414684	-0.076106167	1207.489782	1376.282288	1776.549844	949	0.557175639	188.4120906	0.774693878	0.213328
09/07/2019 13:00	DEHai	DBF	27.26311387	0.777	NaN	638.833	58.46	12.627	0.619549899	17.6	98.6330822	NaN	2.191344955	0.579963259	NaN	415.6662862	385.7113933	592.7956505	NaN	0.558587805	109.3838033	0.650665019	0.414678333
19/07/2019 11:30	DEHai	DBF	15.08812872	1.361	NaN	421.8	86.2	16.483	0.265581071	18.25	35.67140419	NaN	2.306519097	0.67960407	NaN	270.7646868	937.5039219	1460.453203	NaN	0.698373151	116.3692314	0.641926711	0.521302167
26/07/2019 12:30	DEHai	DBF	18.19406495	1.2065	0.183275103	1775.333	28.88	28.513	2.891059501	17.66	226.6419357	NaN	3.081439112	0.599339649	-0.06849441	1364.556631	1323.756501	1722.250691	589.1122685	0.592067959	226.1766089	0.768620102	0.238073333
29/07/2019 13:30	DEHai	DBF	28.37328204	1.3732	0.288274999	946.667	79.337	19.243	0.475017072	17.19	43.81906732	NaN	2.861370908	0.637309083	NaN	703.5033603	290.5665907	390.9999841	613.6145833	0.532584498	229.2491195	0.743137091	0.86522875
31/07/2019 13:00	DEHai	DBF	24.83214388	0.8658	NaN	1646.333	56.193	21.05	1.12903676	17.23	67.40110026	NaN	2.713820995	0.660961353	NaN	1194.720931	1026.133939	1414.019058	NaN	0.633187046	299.5996704	0.725686074	0.4775215
06/07/2018 12:30	DEHoH	DBF	28.50579928	1.4202	NaN	652.14	82.02	16.62	0.349123613	8.06	48.65064612	272.45	1.702919944	0.302084707	-0.032974431	393.4080646	872.7220336	1446.683477	611.7094907	0.459394388	140.243	0.603257068	0.660068
07/07/2018 12:30	DEHoH	DBF	18.38262724	1.9251	0.084393662	1752.95	44.81	19.73	1.308656472	7.93	122.8375681	672.25	1.641083652	0.277119723	-0.052285709	1040.899648	1105.879823	1862.381296	569.6073495	0.439102835	233.46	0.593798824	0.301800333
12/07/2018 12:30	DEHoH	DBF	15.68286178	0.061	NaN	1326.35	50.39	21.9	1.348493338	7.46	232.3140424	510.15	1.582792836	0.364721697	NaN	762.524273	212.3204677	369.3144761	635.3712384	0.456094237	131.528	0.574904266	0.384923083
15/07/2018 13:00	DEHoH	DBF	16.09234674	1.3248	0.095836143	1730.72	41.23	21.75	1.582585464	7.21	120.6454182	656.08	1.547502126	0.416865619	-0.059900321	975.3676636	1082.525224	1920.86341	673.1273148	0.441061847	273.88	0.563561791	0.3154955
16/07/2018 13:00	DEHoH	DBF	14.06473633	0.7928	0.100313111	1750.21	39.71	24.05	1.872065753	7.11	412.6456504	668.01	1.534083759	0.415611534	-0.055221111	982.8034381	1076.164867	1916.471228	638.849537	0.357475559	117.884	0.56153458	0.272490833
26/07/2018 11:30	DEHoH	DBF	11.87692623	0.4902	0.101806164	1637.04	35.08	29.01	2.717872656	6.95	235.5899432	607.52	1.286208014	0.362807097	-0.048641564	850.4466736	852.9635082	1641.8847	384.8582176	0.461024521	235.093	0.519502684	0.386526417
27/07/2018 12:30	DEHoH	DBF	12.48872386	1.6308	0.085766844	1687.09	36.89	29.37	2.69885779	6.78	333.9061953	645.67	1.232184843	0.347395178	-0.047592896	859.9745362	851.7596551	1670.974123	379.447338	0.530480337	201.408	0.509738388	0.314751167
03/08/2018 12:00	DEHoH	DBF	17.01539814	1.0437	0.14525596	1601.82	46.46	27.32	2.027018704	6.41	170.3358104	603.51	1.013711735	0.276853435	-0.047499596	758.5251073	772.78482	1631.933035	348.3611111	0.473022764	252.781	0.473539541	0.280756
06/08/2018 13:00	DEHoH	DBF	7.239606141	1.7666	0.11141697	1623.3	37.54	24.8	2.030561726	6.22	402.419781	605.36	1.001439024	0.265023167	-0.052545686	770.5084266	855.272071	1801.879259	337.7997685	0.498596217	141.717	0.474655595	0.272080833
10/08/2018 13:30	DEHoH	DBF	13.97595352	0.7121	NaN	1520.99	39.73	20.27	1.478836317	6.06	194.6444603	574.35	0.982400616	0.264349052	-0.060179257	717.9976534	634.7330747	1344.604199	344.0338542	0.32680291	163.174	0.472059418	0.494485
18/08/2018 12:30	DEHoH	DBF	19.21226922	1.0291	NaN	1583.24	46.42	22.08	1.472847537	5.89	203.8944147	599.21	0.960461487	0.311330582	-0.050409377	734.3662322	756.8481846	1631.709449	353.390191	0.335100949	178.772	0.463837594	0.323405
23/08/2018 12:30	DEHoH	DBF	10.0807555	1.4327	NaN	1482.34	44.47	27.3	2.099843382	5.8	461.022577	555.05	0.985504004	0.378122736	-0.034938195	692.408464	638.1825821	1366.250729	283.702691	0.253930833	105.879	0.467105026	0.364745
13/05/2018 13:00	DEHzd	DBF	6.397056122	1.8648	0.134877694	1649.35	NaN	23.95	NaN	46.3	NaN	571.51	2.660642361	1.004522906	-0.073790989	1166.453154	994.6784111	1406.462687	791.1770833	0.467602746	196.15	0.707219907	0.376964167
14/05/2018 12:30	DEHzd	DBF	7.592087845	2.116	NaN	1706.81	31.85	21.26	1.779734963	45.32	NaN	598.08	2.783446181	0.935117408	-0.070548609	1231.508851	1295.161863	1795.029907	812.9635417	0.433771434	168.98	0.72152662	0.38698475
20/05/2018 12:30	DEHzd	DBF	9.914101247	2.2185	0.201479587	1748.75	32.21	19.17	1.551175878	46	NaN	621.36	3.531189236	0.512254908	-0.084522861	1414.189736	1485.314547	1836.701079	946.484375	0.442498205	246.56	0.808686053	0.357181917
29/05/2018 13:00	DEHzd	DBF	15.29524855	2.5161	0.129709212	1793.36	40.68	28.69	2.436829942	35.76	NaN	626.47	2.792790799	0.799035768	NaN	1326.377307	1372.065093	1855.133259	1115.59375	0.58183018	211.6	0.739604601	0.368058
03/06/2018 13:00	DEHzd	DBF	20.75877849	2.1095	0.201956066	1469.5	64.13	21.49	0.950342867	32.2	NaN	554.13	3.190186632	0.421664877	-0.082768	1147.542372	1449.445387	1856.105751	1036.84375	0.615193026	192.66	0.780906684	0.46826375
05/06/2018 12:30	DEHzd	DBF	7.271542157	2.1094	0.185295669	388.05	87.88	16.44	0.232597288	30.44	NaN	155.98	3.343457031	0.275145003	NaN	309.2033433	649.8845169	815.6046572	1004.880208	0.6818906	51.36	0.796813151	0.582426417
06/06/2018 12:00	DEHzd	DBF	21.83327858	2.341	0.178898626	1706.27	58.06	21.88	1.138586063	29.18	NaN	619.76	3.231770833	0.335480066	-0.073002735	1337.91119	1424.058913	1816.136242	952.25	0.603232675	311.63	0.784114583	0.367468
07/06/2018 12:00	DEHzd	DBF	16.06262691	2.27	NaN	1828.88	38.44	25.69	2.1126401	28.25	NaN	653.81	3.117708333	0.397098854	NaN	1410.333192	605.9994157	785.8428193	898.5	0.615998549	237.72	0.771145833	0.340468
26/06/2018 12:30	DEHzd	DBF	16.18431745	0.3889	0.188291596	1367.76	58.01	18.92	0.945612632	22.77	NaN	501.33	1.623464627	0.503991539	NaN	769.106022	830.7773201	1477.434781	530.8463542	0.599093728	200.96	0.562310655	0.7026095
30/06/2018 13:00	DEHzd	DBF	13.97220366	1.1977	0.160265718	1713.87	35.21	18.59	1.428596753	23.46	NaN	601.6	1.301833767	0.428793848	-0.058686557	846.1916981	975.9599342	1976.701563	NaN	0.458444462	233.77	0.493731554	0.2851755
01/07/2018 12:30	DEHzd	DBF	7.003265761	1.4236	NaN	546.5	43.79	16.39	1.075229406	22.46	NaN	184.8	1.240890842	0.415125662	-0.056804172	261.8951223	919.6059643	1918.953874	NaN	0.761807729	104.68	0.479222548	0.337158917
02/07/2018 12:00	DEHzd	DBF	10.25382931	1.5445	0.138980623	1856.91	38.96	18.85	1.368483757	22.01	NaN	672.14	1.179947917	0.401457475	-0.055207428	862.9312227	877.9003731	1889.121565	NaN	0.439988109	177.61	0.464713542	0.273
03/07/2018 12:00	DEHzd	DBF	8.034221264	1.2497	NaN	1838.51	30.33	21.96	1.900865154	21.7	NaN	648.98	1.117708333	0.387498476	-0.055458118	827.1379885	831.2218078	1847.587255	NaN	0.409570772	182.73	0.449895833	0.356688
04/07/2018 13:30	DEHzd	DBF	3.134655744	1.7776	0.12206516	1724.46	18.74	28.19	3.240464517	21.49	NaN	568.68	1.051578776	0.372667039	NaN	748.6777894	584.3339683	1345.920193	NaN	0.405009693	158.78	0.434152018	0.31255225
05/07/2018 13:00	DEHzd	DBF	3.788422023	1.1749	0.126375098	1795.93	29.18	29.5	3.051863604	21.41	NaN	685.4	0.990635851	0.358998852	NaN	753.6494748	750.4077167	1788.204962	NaN	0.406350798	186.45	0.419643012	0.373089333
13/07/2018 12:00	DEHzd	DBF	8.591925666	1.1145	0.240168711	897	54.21	22.94	1.327781817	30.97	NaN	316.81	0.8484375	0.384713119	-0.040651639	335.8424063	684.5290318	1828.305569	NaN	0.826081592	200.87	0.37440625	0.25054
15/07/2018 11:30	DEHzd	DBF	18.31241876	1.6222	0.213399869	1687.12	52.25	22.9	1.381190982	28.39	NaN	652.13	0.841737196	0.402212463	-0.043044019	622.6422903	616.6272609	1670.821595	NaN	0.574897574	249.77	0.369056315	0.27375475
16/07/2018 13:00	DEHzd	DBF	14.91433744	0.4512	0.193607361	1664.44	36.38	24.29	2.004759162	26.9	NaN	629.51	0.826475694	0.404610809	NaN	605.4010397	639.9108139	1759.318345	296.5260417	0.584780942	221.17	0.363726563	0.105872
19/07/2018 12:00	DEHzd	DBF	14.85161394	0.5128	NaN	1414.3	54.77	22.44	1.27148842	23.28	NaN	557.33	0.783333333	0.410898974	-0.043590442	493.237125	624.6243454	1791.03755	289.5	0.600981709	219.16	0.34875	0.322564
24/07/2018 12:00	DEHzd	DBF	6.668926383	0.7595	0.120488832	1590.72	43.84	26.43	2.015501177	21.06	NaN	607.22	0.721625	0.412160928	-0.045277073	527.496008	585.7525358	1766.398721	273.625	0.441269232	207.07	0.331608333	0.269156
25/07/2018 11:30	DEHzd	DBF	9.059185731	0.8326	NaN	1303.03	46.63	26.76	1.953810129	20.91	NaN	496.15	0.718320313	0.405071414	NaN	436.0614779	501.1320428	1497.472533	267.3828125	0.595861599	245.06	0.33465191	0.216688333
26/07/2018 13:00	DEHzd	DBF	0.145551575	0.9267	0.1354844	1381.99	35.69	28.37	2.592126899	20.78	NaN	505.03	0.714734375	0.397378537	-0.041256738	467.0497586	625.7950535	1851.713848	260.609375	0.56076789	199.51	0.337954514	0.2902455
27/07/2018 12:30	DEHzd	DBF	10.26167937	0.9999	NaN	629.21	45.25	27.67	2.116672092	20.62	NaN	212.9	0.711429688	0.390289023	NaN	214.5594084	230.151715	674.9354953	254.3671875	0.682670704	139.77	0.34099809	0.25104925
31/07/2018 13:00	DEHzd	DBF	3.359839178	0.5337	0.150601716	815.05	26.84	32.92	3.846524487	20.51	NaN	265	0.698642361	0.362474162	-0.043322049	288.0069736	582.5453708	1648.583708	229.0260417	0.565947437	139.54	0.353361111	0.251352333
02/08/2018 12:30	DEHzd	DBF	3.891279216	1.2608	NaN	1404.56	46.86	29.23	2.253805385	20.36	NaN	526	0.729154514	0.409770674	-0.03914798	495.9462344	617.4067505	1748.546042	230.2630208	0.36593005	168.24	0.353097222	0.307090917
03/08/2018 12:00	DEHzd	DBF	7.494992379	1.2797	0.171513977	1470.25	56.75	28.53	1.759906147	21.27	NaN	583.94	0.74425	0.43317	-0.041459891	518.9492417	570.2431895	1615.572357	230.875	0.540177281	224.26	0.352966667	0.227328
05/08/2018 13:00	DEHzd	DBF	9.23897038	0.3886	0.231917015	1202.46	67.3	23.19	0.962985084	23.18	NaN	469.13	0.775725694	0.481960086	NaN	424.1009617	478.2183301	1355.89981	232.1510417	0.594799005	172.23	0.352694444	0.282157833
07/08/2018 12:30	DEHzd	DBF	0.40881677	0.6014	NaN	1537.87	22.06	31.24	3.718734116	21.44	NaN	571.45	0.806237847	0.529256598	-0.038490765	541.9923785	541.4366973	1536.293289	233.3880208	0.407177458	119.36	0.352430556	0.261059667
09/08/2018 12:00	DEHzd	DBF	3.512492535	-0.0683	0.169612349	1158.91	36.73	31.25	3.02054336	20.72	NaN	437.05	0.802541667	0.535328851	-0.040596712	407.4582696	476.5239841	1355.349619	235	0.34297738	52.16	0.3515875	0.314708
16/08/2018 13:00	DEHzd	DBF	6.650863428	0.5772	0.115828988	1432.7	31.85	27.27	2.572436745	19.79	NaN	526.83	0.670625868	0.413253284	-0.04226187	496.3672475	607.7476592	1754.185184	241.7708333	0.230270202	73.12	0.346455816	0.2498425
17/08/2018 13:00	DEHzd	DBF	3.026716783	0.9203	0.10963718	712.98	30.01	29.01	2.93012796	19.82	NaN	211.54	0.661646701	0.394388043	-0.040854792	244.5488598	551.3332492	1607.407126	236.2708333	0.562969974	107.06	0.342995399	0.245583667
01/09/2018 13:00	DEHzd	DBF	2.50327579	-0.4892	0.195335551	194.61	69	15.02	0.542093774	20.38	NaN	60.22	0.501703559	0.131971844	-0.030836514	55.33968477	359.6297232	1264.689901	264.6145833	0.599338591	23.56	0.284361979	0.366708667
09/09/2018 12:30	DEHzd	DBF	12.65077412	0.1922	0.18282835	981.31	36.95	21.73	1.695718677	21.12	NaN	369.8	0.826518012	0.330803164	NaN	393.6100853	277.0393093	690.6871922	NaN	0.731994645	164.04	0.401106771	0.18375
18/09/2018 13:00	DEHzd	DBF	3.06388763	0.2403	0.124860267	1128.1	29.49	27.76	2.74065104	19.77	NaN	397.62	0.61764974	0.341899238	-0.053063139	399.7851263	493.8245131	1393.457126	NaN	0.396033423	82.47	0.354388021	0.201192
18/05/2019 12:30	DEHzd	DBF	11.78596743	1.2754	0.242033325	1811.27	58.05	17.92	0.886036386	49.73	NaN	NaN	2.955150463	1.006644193	-0.07746143	1348.575942	1348.105688	1810.638402	547.953125	0.25543665	104.07	0.744547164	0.331245167
19/05/2019 12:00	DEHzd	DBF	14.18501077	2.0944	NaN	1436.43	43.46	21.74	1.521583926	48.99	NaN	NaN	3.040555556	0.978341154	-0.066475233	1089.552105	1327.395509	1749.994994	569.25	0.380341546	145.88	0.758513889	0.447672
23/05/2019 12:30	DEHzd	DBF	14.71810632	2.0495	0.246970694	NaN	51.66	15.46	0.87012749	51.52	NaN	NaN	2.917473235	0.890525686	-0.030611097	NaN	1315.351635	1741.343379	1077.354167	0.403075656	225.15	0.75536603	0.378428333
29/05/2019 12:00	DEHzd	DBF	14.37005826	2.1341	0.26636957	770.89	67	11.83	0.466459543	51.87	NaN	NaN	2.5359375	0.805249125	-0.041999685	554.960499	1029.329169	1429.830707	1848.875	0.690958364	140.23	0.719895833	0.434652
03/06/2019 12:30	DEHzd	DBF	15.66689634	3.9131	0.188756878	1808.98	33.2	28.24	2.671766269	45.47	NaN	NaN	2.360731337	0.864614252	-0.073299653	1240.780481	1260.464496	1837.678057	1697.622396	0.541185334	193.95	0.685900608	0.37355575
13/06/2019 12:30	DEHzd	DBF	26.65859763	2.2524	0.296930086	1798.6	57.39	20.89	1.087196443	47.15	NaN	NaN	2.079733073	0.594512401	-0.048880664	1129.706983	1096.487488	1745.711433	1169.083333	0.644222395	281.1	0.628103516	0.467373083
21/06/2019 13:30	DEHzd	DBF	33.49649339	1.3956	NaN	1546.15	66.17	21.45	0.894052735	44.07	NaN	NaN	2.294591146	0.540122832	NaN	1081.26618	784.4037015	1121.653303	816.875	0.691022917	302.44	0.699328125	0.827927
22/06/2019 13:00	DEHzd	DBF	30.47796441	1.5925	NaN	1553.58	51.31	23.67	1.476963366	43.36	NaN	NaN	2.262074653	0.5262168	NaN	1078.222281	1129.101503	1626.890433	799.25	0.810435564	378.83	0.694024306	0.354854167
01/07/2019 13:30	DEHzd	DBF	28.44858758	0.9267	NaN	1566.59	46.99	26.11	1.866059153	34.34	NaN	NaN	1.836809896	0.393251146	-0.061459667	966.8593673	1094.4517	1773.326243	605.6796875	0.743334993	328.45	0.617174479	0.34425475
04/07/2019 12:30	DEHzd	DBF	20.97331117	1.419	NaN	1795.86	33.23	19.03	1.514254105	32.29	NaN	NaN	1.558274595	0.34427683	-0.044097759	1007.490451	1027.118906	1830.847882	507.6848958	0.568472955	229.43	0.561007234	0.370504
10/07/2019 12:30	DEHzd	DBF	24.83081528	0.6984	NaN	1800.78	51.99	16.98	0.954277433	29.29	NaN	NaN	1.059606481	0.279850947	-0.058493771	781.8412553	807.3056088	1859.430907	425.9921875	0.47249102	223.63	0.434168113	0.3132545
26/07/2019 12:30	DEHzd	DBF	14.78081021	1.0359	0.15357289	1686.36	44.1	28.25	2.237134314	25.23	NaN	NaN	1.035543403	0.493183137	-0.041411101	720.8881591	782.0480688	1829.430217	473.4192708	0.411428571	182.16	0.427481771	0.250776583
30/07/2019 12:30	DEHzd	DBF	23.35970412	1.0038	NaN	1430.2	60.26	25.51	1.349000907	23.32	NaN	NaN	0.899876736	0.476632918	NaN	549.1707286	537.0180065	1398.550784	481.9192708	0.408922742	150.32	0.383981771	0.441962583
27/03/2018 12:30	DEObe	ENF	9.660218555	-0.0951	NaN	633.82	89.51	-0.61	0.061220524	NaN	NaN	287.92	0.51230513	0.113403882	-0.003157816	176.2222946	216.3578011	778.1756661	321.1380208	0.517222089	64.72	0.278032083	NaN
06/04/2018 13:00	DEObe	ENF	14.88808805	0.2007	NaN	1474.5	28.5	6.39	0.694114364	NaN	NaN	612.13	0.76038655	0.161376513	-0.059056955	571.8381513	585.3765103	1509.409022	329.7019676	0.212317666	69.43	0.387818346	0.196096667
07/04/2018 12:30	DEObe	ENF	14.03867044	0.3088	0.310104114	1537.66	34.04	11.9	0.936772091	NaN	NaN	635.78	0.792650758	0.170198905	-0.055289987	613.981607	601.6569529	1506.794047	331.8370949	0.207559838	61.83	0.399296078	0.271634333
08/04/2018 12:30	DEObe	ENF	11.59269487	-0.4248	0.296363002	313.03	85.36	6.94	0.147738554	NaN	NaN	129.05	0.825601438	0.179209009	-0.05383629	128.6609697	610.2879455	1484.820424	334.0176505	0.257383966	12.81	0.411018017	0.219717
22/04/2018 13:00	DEObe	ENF	19.16326861	0.3161	NaN	1556.71	32.34	19.69	1.600274567	NaN	NaN	630.71	2.12642432	0.577037578	-0.043528764	1078.059181	979.6725433	1414.640376	493.9513889	0.398494673	210.19	0.692524093	0.375994167
27/04/2018 13:00	DEObe	ENF	23.96502295	0.6068	0.233937195	1484.03	43.9	9.96	0.698202406	NaN	NaN	629.32	2.549734269	0.769732904	-0.070020651	1080.724972	946.8928507	1300.254397	535.3229167	0.333199877	108.19	0.728236607	0.404652333
28/04/2018 13:00	DEObe	ENF	30.52989583	0.2953	NaN	1598.36	45.25	17	1.089658238	NaN	NaN	666.76	2.593560799	0.771036792	-0.030387076	1168.167726	1151.94648	1576.165079	549.0729167	0.343318024	151.75	0.730853954	0.396835833
06/05/2018 12:00	DEObe	ENF	13.72651809	0.8415	NaN	1777.32	48.03	12.72	0.779960828	NaN	NaN	734.02	2.884472789	0.831995697	-0.081933256	1323.368895	1271.912493	1708.212668	657.5	0.214290912	58.9	0.744586735	0.372616
07/05/2018 13:30	DEObe	ENF	15.64398851	0.597	0.169921196	1635.88	41.38	16.8	1.151637113	NaN	NaN	667.91	2.900292836	0.860252835	-0.078709036	1216.436143	1278.739336	1719.666189	671.578125	0.313451707	114.04	0.743597417	0.4229355
10/05/2018 12:30	DEObe	ENF	24.82876846	0.1906	0.144818763	1494.64	58.55	18.35	0.900005946	NaN	NaN	637.67	2.944340809	0.93892957	NaN	1107.293352	383.7153459	517.944322	710.7760417	0.323712575	135.15	0.740842847	0.771356486
13/05/2018 13:00	DEObe	ENF	15.75793292	0.5543	0.159910845	1509.08	37.18	19.5	1.467971655	NaN	NaN	607.51	3.047594246	0.92624413	NaN	1128.59048	1123.894532	1502.800875	789.5607639	0.409831155	150.49	0.747866567	0.4839275
20/03/2019 12:30	DEObe	ENF	12.37481466	0.1535	0.361225585	1305.35	45.71	4.15	0.449280888	33.255	NaN	526.37	0.796817425	0.144163467	-0.05735678	623.3866603	615.7597294	1289.379472	225.698206	0.131135769	56.61	0.477562845	0.246677167
29/03/2019 13:00	DEObe	ENF	10.82390629	0.3522	0.290480137	1438.93	62.35	8.15	0.413497989	36.995	NaN	604.52	1.17756165	0.205787544	-0.06210278	795.2734242	551.3846831	997.6492839	290.6168981	0.256045066	96.36	0.552683886	0.365849667
31/03/2019 12:30	DEObe	ENF	13.41266696	0.1611	0.285432585	924.34	69.53	7.37	0.31690478	30.13	NaN	414.02	1.323474702	0.239521338	-0.064136317	534.6223198	644.8495237	1114.918302	304.0862269	0.346157028	83.68	0.578382759	0.1598965
01/04/2019 12:00	DEObe	ENF	9.159005647	1.0993	NaN	NaN	NaN	NaN	NaN	NaN	NaN	NaN	1.395663265	0.256210689	-0.067319616	NaN	805.7298624	1363.109516	310.75	0.136408106	39.04	0.591096939	0.340212
09/04/2019 13:00	DEObe	ENF	17.31236839	-0.4414	NaN	1271.16	72.9	6.63	0.267575683	15	NaN	535.96	1.437293084	0.313737499	NaN	750.7281619	208.7301295	353.4293835	323.2280093	0.103974041	29.8	0.590585105	0.593619833
12/04/2019 12:00	DEObe	ENF	2.472767295	0.0117	NaN	282.89	74.07	-2.46	0.131617883	14.215	NaN	111.34	1.591530612	0.397251331	NaN	174.8231334	137.4418508	222.401489	380.5555556	0.367175737	34.14	0.617989796	0.789176
18/04/2019 13:30	DEObe	ENF	11.02113993	0.3473	0.200539136	1460.3	26.66	13.62	1.168922361	16.755	NaN	586.63	2.070716943	0.632915922	-0.070675558	1030.85818	1032.196549	1462.195916	551.1961806	0.344740216	112.93	0.705922194	0.32896525
02/05/2019 12:30	DEObe	ENF	22.18664173	0.5581	0.264095401	1367.23	56.87	11.65	0.602274401	22.675	NaN	591.47	2.351719281	0.71032533	NaN	970.2003157	252.6906664	356.0978637	486.6333189	0.261924406	117.46	0.709610172	0.62246075
14/05/2019 12:00	DEObe	ENF	12.76944266	0.8048	NaN	858.77	74.6	3.58	0.201736651	27.065	NaN	383.4	2.828129252	0.546706914	NaN	644.6324874	473.0233679	630.1548333	698.125	0.506862024	158.44	0.750646259	0.476988
12/06/2019 13:00	DEObe	ENF	10.49349903	1.0821	NaN	1735.12	45.72	25.63	1.856036981	22.49	NaN	710.65	2.238473669	0.760582603	NaN	1124.686609	271.652241	419.0938457	751.7340856	0.497270831	274.22	0.648189525	0.7431365
14/06/2019 12:30	DEObe	ENF	8.644355698	1.1726	0.227695109	1817.12	26.78	23.21	2.158928374	17.49	NaN	746.29	2.16764974	0.810047803	NaN	1166.340108	671.8908795	1046.784164	739.442419	0.380642558	150.94	0.641861907	0.742073
27/06/2019 11:30	DEObe	ENF	11.52850772	1.3962	NaN	1868.8	35.49	18.49	1.413339715	7.36	NaN	767.63	2.700258468	0.563230345	-0.07444414	1364.555198	1300.909475	1781.635238	1106.490451	0.421389064	220.18	0.730177225	0.452534417
28/06/2019 13:00	DEObe	ENF	17.02094903	1.2676	NaN	1851.6	57.86	15.14	0.742742054	7.135	NaN	786.03	2.606413336	0.50701918	-0.073569259	1337.18768	1386.311396	1919.621471	1080.060764	0.258553711	124.46	0.722179563	0.372284333
29/06/2019 12:30	DEObe	ENF	11.86367636	1.8127	NaN	1835.09	37.28	22.32	1.750053358	6.9	NaN	749.65	2.519389527	0.456015036	-0.070119511	1311.347811	1369.008466	1915.779875	1054.677951	0.341889474	137.59	0.714595911	0.467643
02/07/2019 11:30	DEObe	ENF	17.79020694	0.6298	NaN	1249.69	53.72	15.01	0.808760686	5.61	NaN	519.09	2.181545848	0.412864504	-0.032559372	827.3513225	680.8670167	1028.429736	835.3914931	0.378102116	148.7	0.662045245	0.861065583
03/07/2019 13:00	DEObe	ENF	18.97588976	1.6866	NaN	1709.38	45.74	13.58	0.862516543	5.545	NaN	733.84	2.060207625	0.397366778	NaN	1099.424352	1119.296332	1740.276864	756.6336806	0.309988704	115.26	0.643171414	0.452268
16/07/2019 12:00	DEObe	ENF	12.5526944	1.2808	NaN	605.9	86.3	9.88	0.169572492	13.07	NaN	264.32	1.380846088	0.25388908	NaN	322.9135291	629.4966841	1181.158442	430.2222222	0.34559177	71.89	0.532948554	0.535792
18/07/2019 13:30	DEObe	ENF	14.90046481	0.7923	NaN	757.93	49.06	18.65	1.127531985	9.015	NaN	299.4	1.324153646	0.271159936	NaN	391.61197	676.5895128	1309.478588	387.3680556	0.493661576	114.1	0.516686198	0.373979
05/04/2018 13:00	DETha	ENF	6.94940559	0.7958	0.260606576	758.17	51.43	12.65	0.725518303	32.4	NaN	291.96	1.151441327	0.396306431	NaN	380.015413	63.35825371	126.4062603	362.1458333	0.411253106	69.51	0.501227183	0.623216333
06/04/2018 12:30	DETha	ENF	9.210444432	0.8248	NaN	1617.78	28.81	8.42	0.796672249	31.3	NaN	636.86	1.21328869	0.405606489	-0.062864666	840.5902111	761.3646757	1465.304412	377.3229167	0.213833415	96.58	0.519594884	0.178874833
18/04/2018 12:00	DETha	ENF	6.661506201	0.5541	0.324153238	1704.99	31.3	19.13	1.567994628	33.53	206.0721504	674.68	2.405952381	0.863663116	-0.070630671	1239.60892	1126.227028	1549.041629	909.6666667	0.390103468	180.22	0.727047619	0.322412
21/04/2018 13:00	DETha	ENF	10.47410578	0.6628	0.26074469	1567.5	41.83	20.32	1.431825749	30.5	165.3688197	633.55	2.341135913	0.878014867	-0.056931018	1109.223958	1048.761325	1482.05722	757.234809	0.366404659	192.52	0.707638889	0.405749167
22/04/2018 12:30	DETha	ENF	6.935634193	0.7695	NaN	1656.81	38.17	21.48	1.637104	29.97	229.8106458	674.73	2.320270337	0.882634951	NaN	1162.071412	720.5971994	1027.3832	708.1642795	0.415689523	195.69	0.701390873	0.365388667
28/04/2018 12:30	DETha	ENF	9.156376887	0.4406	NaN	748.79	33.9	18.96	1.492375948	30.7	354.7472493	299.19	2.176294643	0.857409857	-0.044419824	499.980705	1090.502798	1633.178205	580.8474392	0.421095376	82.96	0.667718192	0.415930667
07/05/2018 13:00	DETha	ENF	14.34194633	0.7374	0.184341627	1639.39	36.27	19.64	1.502545053	28.07	147.06573	714.03	2.089453125	0.834766808	-0.079421737	1061.02382	1178.834921	1821.420165	682.1953125	0.373334204	228.6	0.647206473	0.5111735
09/05/2018 12:00	DETha	ENF	17.64986602	1.1531	0.172692506	1668.28	49.45	20.99	1.297921221	26.9	136.6831239	725.7	2.146279762	0.904007137	-0.071344468	1084.009616	1101.574403	1695.312032	610.1041667	0.420094463	238.37	0.649776786	0.418928
17/05/2018 13:00	DETha	ENF	11.84648031	1.2125	0.226265278	581.53	86.63	11.62	0.186322267	24.13	2.44886624	302.92	2.499421296	0.787459357	NaN	407.2976313	831.3751237	1187.017892	NaN	0.683207694	262.83	0.700389716	0.464364833
18/05/2018 13:00	DETha	ENF	18.82265871	0.9976	0.216447513	1382.47	66.58	12.28	0.486951691	24	102.1761283	691.94	2.552199074	0.743303707	NaN	981.0665896	299.7932304	422.4536353	NaN	0.381580835	159.6	0.709647652	0.744996
19/05/2018 12:30	DETha	ENF	17.70095199	1.4201	NaN	608.76	72.43	13.67	0.440887113	23	95.01119887	285.42	2.603877315	0.700067966	-0.034845286	437.5235524	1006.046614	1399.789643	NaN	0.419464564	104.82	0.718712715	0.632762917
06/06/2018 13:30	DETha	ENF	13.41812351	1.22525	0.186425173	1562.86	48.78	22.07	1.407096795	17.73	266.374613	726.81	3.567122396	0.852714554	-0.092360395	1243.997023	1459.662676	1833.805361	NaN	0.306260399	147.25	0.795974702	0.4827575
15/06/2018 12:30	DETha	ENF	15.27250876	1.14	NaN	NaN	43.76	20.46	1.396611815	15.7	NaN	NaN	2.095039683	1.141226877	NaN	NaN	302.0256295	496.1087289	NaN	0.318944381	165.21	0.608789187	0.888611583
20/06/2018 12:30	DETha	ENF	7.583696874	2.0201	NaN	1630.9	40.16	25.77	2.063593732	14.77	436.7790534	750.91	2.618849206	1.037068293	-0.067979012	1134.024796	1135.315541	1632.756287	NaN	0.324346928	131.86	0.695336806	0.493826486
26/06/2018 12:00	DETha	ENF	13.63416545	1.6354	0.189943317	1426.91	54.27	17.89	0.964010995	14.4	242.0906917	641.11	2.582610544	0.868267216	-0.037398785	1008.505043	985.2926837	1394.06738	NaN	0.262474368	107.52	0.70677551	0.545644
27/06/2018 13:30	DETha	ENF	11.83953995	1.7901	0.183097483	948.7	42.04	19.46	1.350962781	14.27	191.0525104	419.2	2.553111713	0.836731504	-0.059876679	669.4070763	830.9633045	1177.661418	NaN	0.381060287	144.62	0.705604592	0.353904
29/06/2018 13:00	DETha	ENF	5.943708355	1.6874	0.18560909	1746.45	28.84	25.09	2.354664919	13.9	179.9359879	756.95	2.492683886	0.776794442	-0.067726757	1226.645153	1385.686485	1972.886907	1036.198785	0.484869457	280.24	0.702364884	0.364572833
01/07/2018 12:00	DETha	ENF	15.50886534	1.0712	NaN	1353.25	40.16	15.59	1.086354106	13.47	215.6530065	595.64	2.18079932	0.662548597	-0.074232068	880.2258352	1210.601057	1861.165414	888.875	0.26734806	121.63	0.650453231	0.426908
06/07/2018 12:30	DETha	ENF	16.32275613	0.836	NaN	1185.88	59.13	18.75	0.910444021	12.6	165.5220771	564.09	1.381180378	0.369641697	-0.055472664	613.5275747	954.344976	1844.641817	511.1618924	0.295361687	139.52	0.517360589	0.334066333
15/07/2018 13:00	DETha	ENF	13.05053325	1.5358	0.223193505	1624.72	44.89	23.23	1.626954997	14.47	332.4352244	732.44	0.732126382	0.197072125	-0.04033772	548.8095659	616.812486	1826.038839	220.5321181	0.274428749	132.11	0.337787167	0.270711167
22/07/2018 12:30	DETha	ENF	7.992882579	1.1265	NaN	894.67	38.24	23.7	1.876892072	12.4	282.4821093	407.33	0.575540232	0.313430279	NaN	245.8469887	117.3960563	427.2199154	160.7730035	0.395106654	133.55	0.274790692	0.803535917
24/07/2018 13:30	DETha	ENF	4.768741949	0.7575	0.120902168	1508.39	37.64	26.35	2.227239313	11.83	NaN	705.79	0.559986182	0.334917474	-0.044655635	405.7593951	486.1037619	1807.066114	156.2478299	0.150754112	66.27	0.269001648	0.241275
27/07/2018 12:30	DETha	ENF	3.684925811	0.509	NaN	1034.37	40.47	27.15	2.230958094	11.8	651.3198553	492.49	0.577846868	0.349290994	NaN	287.0291542	329.2797124	1186.628784	166.9923322	0.276308213	81.58	0.277491762	0.27582225
02/07/2018 12:00	FRFon	DBF	7.676519022	-0.3672	NaN	1065.8	60.01	22.2183	1.108786441	NaN	90.49594664	NaN	2.240625	0.628638135	-0.050574343	712.9017778	1003.916216	1500.871419	1026.347222	0.715724886	201.378	0.668888889	0.540732
09/07/2018 13:00	FRFon	DBF	24.27066902	1.255	0.156431555	1860.68	44.625	23.7583	1.688899866	NaN	71.89066661	NaN	2.407711227	0.792420264	-0.076565617	1272.388008	1359.441981	1987.983611	952.2566551	0.659518563	407.626	0.683829572	0.277422
10/07/2018 12:30	FRFon	DBF	29.77390902	0.8784	NaN	1827.92	51.0817	20.1217	1.189096843	NaN	58.43261624	NaN	2.442050058	0.872478519	-0.071526823	1252.125389	1177.115344	1718.416301	920.7533275	0.632642435	354.796	0.685000103	0.315482083
11/07/2018 12:30	FRFon	DBF	29.30972902	0.5647	0.122927912	1120.93	55.725	19.9733	1.066163835	NaN	83.17804031	NaN	2.477119502	0.954240142	NaN	769.1771665	713.1912489	1039.341132	888.5797164	0.658002873	217.137	0.68619554	0.388038167
20/07/2018 13:00	FRFon	DBF	24.71102902	1.0175	NaN	1148.92	70.935	22.1833	0.804119056	NaN	50.92575195	NaN	2.384089782	0.961448249	NaN	771.4376608	962.9669477	1434.169009	766.8926505	0.797750565	234.023	0.671445933	0.632647667
27/07/2018 12:30	FRFon	DBF	12.55779902	0.7568	0.10865939	1868.68	29.9417	34.05	3.929329144	NaN	NaN	NaN	2.071508143	0.713229036	-0.018360949	1179.324435	1054.995471	1671.676494	776.1397569	NaN	NaN	0.63110026	0.198312917
04/08/2018 13:00	FRFon	DBF	11.51577902	0.5951	0.094487591	1743.83	32.2467	30.5283	3.101311383	NaN	208.4620251	NaN	1.914262979	0.685804369	-0.07266592	1055.377204	1156.233474	1910.477705	723.989294	0.550246251	274.284	0.605206473	0.219302167
05/08/2018 13:00	FRFon	DBF	17.04414902	1.4801	NaN	1719.8	51.05	27.565	1.880605308	NaN	154.4857434	NaN	1.918479249	0.6940887	-0.06391331	1041.985744	1153.903365	1904.520304	709.7323495	0.504928597	240.396	0.605876116	0.2570945
19/08/2018 13:30	FRFon	DBF	18.78953902	0.136	NaN	1591.95	44.9267	25.3817	1.854988162	NaN	147.5143178	NaN	1.895926339	0.964819351	-0.065662725	1024.037532	1089.573387	1693.830841	666.6818576	0.479586413	258.029	0.643259859	0.2809225
20/08/2018 13:00	FRFon	DBF	15.94425902	1.3624	0.108254802	525.697	67.835	22.5567	0.910789408	NaN	111.3941167	NaN	1.911371528	0.976833449	NaN	339.1479044	480.3567321	744.5780725	657.2369792	0.814077624	125.669	0.645139509	0.569565
23/08/2018 12:30	FRFon	DBF	29.65631902	0.6205	0.10035829	1545.67	59.39	24.8683	1.325736648	NaN	155.12242	NaN	1.958364335	1.013386979	-0.058125086	1006.012373	1042.491769	1601.718126	628.500434	0.408477165	194.159	0.650858445	0.299957167
26/08/2018 13:00	FRFon	DBF	23.79052902	0.5485	0.087521188	1503.39	31.3667	20.7817	1.739288601	NaN	130.8969336	NaN	1.924590774	0.978038705	NaN	972.5958259	690.3843849	1067.161664	578.8885995	0.495069374	246.7	0.646935144	0.2548895
27/08/2018 12:30	FRFon	DBF	28.30368902	0.8189	NaN	911.732	81.8117	18.635	0.402202762	NaN	69.14042341	NaN	1.900985863	0.955324099	NaN	587.2940785	579.4616592	899.5727298	559.6248553	0.445674513	140.74	0.644152096	0.540295
28/08/2018 12:30	FRFon	DBF	21.26982702	0.9173	0.113203208	1526.83	51.6	23.3	1.435053229	NaN	255.020454	NaN	1.87687872	0.932126203	-0.054699785	979.1710936	939.4376982	1464.873371	539.9512442	0.350917146	138.068	0.641309834	0.276559583
02/09/2018 12:30	FRFon	DBF	12.97439902	0.8248	0.116407834	1540.42	35.275	21.7483	1.742759299	NaN	258.0079478	NaN	1.810422867	0.84515609	-0.074930318	976.8529303	978.9119515	1543.666914	463.2546296	0.421694909	126.993	0.634147135	0.227007333
13/09/2018 12:30	FRFon	DBF	14.03607902	0.5808	0.093786917	390.168	83.9767	16.4533	0.307772738	NaN	116.4663127	NaN	1.780347842	0.787596749	NaN	247.4439989	174.464212	275.0939728	421.8961227	0.377351673	55.8725	0.634198599	0.751598417
19/09/2018 12:30	FRFon	DBF	30.67576902	0.1687	0.10491311	1312.47	56.8683	22.7217	1.23389416	NaN	NaN	NaN	1.605019221	0.721742769	-0.061051396	812.2625208	703.7349866	1137.109043	362.1809896	NaN	NaN	0.618880828	0.423477333
28/09/2018 13:00	FRFon	DBF	13.20881902	1.075	NaN	1254.07	59.4317	18.8183	0.907678423	NaN	168.8477529	NaN	1.635739087	0.699486658	-0.027009062	825.3416614	652.3727241	991.2513815	323.2016782	0.310861935	116.106	0.658130456	0.318927167
04/10/2018 12:30	FRFon	DBF	14.26469902	0.7555	0.112325956	1243.15	52.8033	17.7217	0.984199317	NaN	191.2667965	NaN	1.475226935	0.568565847	-0.077625043	828.4184182	803.102112	1205.159577	298.6854745	0.317165784	115.017	0.666386533	0.209264
05/05/2018 12:00	ITSR2	ENF	11.71322574	0.2705	NaN	1051.97	72.2025	19.5956	0.653528284	10.6894	128.0879896	442.116	NaN	NaN	0.088221146	NaN	NaN	NaN	NaN	0.567313792	135.036	NaN	0.000425
06/05/2018 12:00	ITSR2	ENF	12.02079012	0.6565	NaN	545.794	86.95	18.498	0.28605707	10.468115	103.6630365	233.643	NaN	NaN	NaN	NaN	NaN	NaN	NaN	0.382687781	73.8716	NaN	0.928985
18/05/2018 13:00	ITSR2	ENF	16.41089776	1.1289	0.490026057	1771.08	68.8132	19.7695	0.741352423	11.0213	150.0063219	745.617	NaN	NaN	0.099336294	NaN	NaN	NaN	NaN	0.336288078	155.734	NaN	NaN
25/05/2018 12:30	ITSR2	ENF	17.68973245	1.254	NaN	1796.11	77.7857	20.8149	0.564127129	10.09332	114.302268	763.711	NaN	NaN	0.106810608	NaN	NaN	NaN	NaN	0.338406568	190.841	NaN	NaN
30/05/2018 12:30	ITSR2	ENF	15.1402692	0.5844	NaN	560.959	82.5765	22.1124	0.47991835	NaN	NaN	224.066	NaN	NaN	0.045162302	NaN	NaN	NaN	NaN	1.519363804	182.535	NaN	0.197808417
20/06/2018 12:30	ITSR2	ENF	4.462882163	1.5582	NaN	517.978	59.6292	26.2518	1.433357624	4.44969	216.4091193	175.08	NaN	NaN	0.092573518	NaN	NaN	NaN	NaN	0.640396826	111.791	NaN	NaN
25/06/2018 13:00	ITSR2	ENF	21.93789166	0.6104	NaN	1367.02	81.8862	20.0939	0.439532903	4.236365	76.12889747	568.443	NaN	NaN	0.079869752	NaN	NaN	NaN	NaN	0.698529614	215.713	NaN	0.036906563
26/06/2018 12:30	ITSR2	ENF	12.98943631	0.9364	NaN	1212.37	43.0282	24.382	1.805410316	4.233295	198.7929751	479.463	NaN	NaN	0.113626063	NaN	NaN	NaN	NaN	0.573449896	182.946	NaN	0.0020055
01/07/2018 12:30	ITSR2	ENF	18.15798501	1.1647	NaN	1889.66	49.1925	27.3199	1.923555026	4.1135	216.5277381	734.064	NaN	NaN	0.116583387	NaN	NaN	NaN	NaN	0.392403912	220.004	NaN	NaN
08/07/2018 12:00	ITSR2	ENF	21.34068544	0.4031	NaN	1875.48	75.0227	26.0326	0.875147179	5.153395	184.2971732	757.986	NaN	NaN	0.034826826	NaN	NaN	NaN	NaN	0.355898834	176.25	NaN	0.0008
14/07/2018 13:30	ITSR2	ENF	9.210006801	0.8314	NaN	1679.73	51.9125	28.2602	1.925643317	4.44151	267.3715139	664.643	NaN	NaN	NaN	NaN	NaN	NaN	NaN	0.389611339	186.625	NaN	NaN
18/07/2018 12:00	ITSR2	ENF	22.83768224	0.5209	NaN	1847.2	73.7497	26.132	0.92529289	7.84573	127.0910572	738.882	NaN	NaN	0.089432644	NaN	NaN	NaN	NaN	0.423558684	239.004	NaN	0.023835
01/08/2018 13:00	ITSR2	ENF	11.29752428	-0.0203	NaN	1695.88	76.0095	29.7442	1.048793743	4.605325	215.2734531	682.89	NaN	NaN	0.143787422	NaN	NaN	NaN	NaN	0.352304429	166.442	NaN	NaN
02/08/2018 12:30	ITSR2	ENF	19.76912145	0.9693	NaN	1873.14	79.0853	29.1141	0.880996453	4.511875	NaN	NaN	NaN	NaN	0.191233387	NaN	NaN	NaN	NaN	0.283008686	152.09	NaN	NaN
07/04/2018 12:30	RUFyo	ENF	6.180327212	0.3419	NaN	700.063	89.56	2.69333	0.077753682	76.24443333	60.00654356	310.2	NaN	NaN	-0.067101339	NaN	NaN	1043.01373	NaN	0.235149784	49.068	NaN	0.340233
13/04/2018 12:00	RUFyo	ENF	5.641465959	-0.0758	0.316070118	1391.94	21.8467	10.0967	0.981827709	76.53333333	455.3893999	537.067	1.147108844	0.388175478	-0.079987728	694.4667995	673.3157916	1349.54642	308.6805556	0.162463709	50.979	0.498920068	0.178268
14/04/2018 13:30	RUFyo	ENF	6.371532849	0.3931	0.297105781	1325.94	30.2433	11.9333	0.992923023	76.52223333	395.6742592	533.833	1.144398384	0.413905457	-0.058582083	657.1175703	594.1394133	1198.861892	319.1137153	0.167880702	60.6487	0.495586203	0.1553875
20/04/2018 11:30	RUFyo	ENF	7.137265357	0.6006	0.389741291	1363.37	51.9033	12.4867	0.710611988	76.5011	146.5208381	538.233	1.120300985	0.463158507	-0.045988963	654.0160618	588.615306	1227.034773	354.5341435	0.356195638	119.743	0.479705481	0.17318625
27/04/2018 12:30	RUFyo	ENF	8.902733495	0.4586	0.354370472	968.962	77.6353	9.91333	0.277454125	76.24	48.96030762	403.6	1.191748069	0.367857957	-0.068771139	479.1735694	274.2840197	554.6440983	365.5795718	0.396524875	140.302	0.494522561	0.84423675
02/05/2018 11:00	RUFyo	ENF	15.0043343	0.3067	0.327789394	1048.3	69.7867	19.4333	0.703032774	75.36666667	78.35364322	406	1.744088896	0.585211798	-0.066194376	647.9197658	942.8372453	1525.460923	466.7297454	0.48223235	184.749	0.618067124	0.149081
06/05/2018 13:30	RUFyo	ENF	10.09649165	0.3179	0.338762158	1487.23	64.78	11.2433	0.478447982	74.53223333	78.55920712	616.4	2.417858472	0.638805434	-0.085312901	1074.271436	1079.53659	1494.519122	548.3159722	NaN	158.128	0.722330397	0.16585375
07/05/2018 13:00	RUFyo	ENF	7.348408843	0.5232	0.325737488	1440.5	37.8	18.4167	1.356341975	74.4411	74.70720765	584.333	2.629299355	0.621580344	-0.070554861	1076.88352	1130.171396	1511.780862	567.1921296	NaN	329.286	0.747576203	0.185186333
09/05/2018 12:30	RUFyo	ENF	8.263706439	0.4702	NaN	1422.08	31.46	16.8133	1.347686973	73.93776667	163.227876	633.633	3.056679865	0.586763672	-0.093678768	1135.680141	1242.155401	1555.406571	605.3460648	NaN	178.169	0.798604959	0.193764167
10/05/2018 12:00	RUFyo	ENF	8.135904605	0.8705	0.354974777	1409.21	35.95	13.74	1.029041841	73.8111	110.2721174	640.233	3.268120748	0.569538582	-0.115640013	1160.978737	1297.671531	1575.129363	624.2222222	NaN	198.692	0.823850765	0.226296
13/05/2018 13:00	RUFyo	ENF	5.776152355	1.0304	0.24962031	1318.1	33.47	23.31	1.973823462	73.3811	173.2454055	651.433	3.511197917	0.658127401	-0.082815052	1114.340848	1235.162528	1461.014133	675.1041667	0.359841493	233.558	0.845414497	0.2139635
18/05/2018 13:00	RUFyo	ENF	10.78146573	1.3207	0.252128586	1043.87	58.09	19.8167	0.999244957	73.0211	27.65481957	548.4	2.604947917	1.252232915	-0.026443605	732.1746768	537.6543675	766.54012	734.2708333	0.601168487	472.091	0.70140408	0.416628778
21/05/2018 12:00	RUFyo	ENF	5.979691649	1.1161	0.223573965	1342.25	39.0033	17.87	1.284185649	73.0311	177.428663	650.467	NaN	NaN	-0.099767976	NaN	NaN	1626.00083	788.4513889	0.341787043	170.832	NaN	0.306924
23/05/2018 13:00	RUFyo	ENF	14.84902072	1.7006	0.187386806	884.126	62.96	18.2133	0.797225019	72.82333333	71.27048384	464.633	NaN	NaN	-0.025477707	NaN	NaN	919.4936789	851.7572338	0.403015179	222.387	NaN	0.506610125
06/06/2018 13:30	RUFyo	ENF	12.31110126	1.66835	0.221306511	799.971	69.5967	8.83333	0.350127884	70.09443333	19.8032283	423.033	1.732421875	0.238076671	NaN	459.9052028	422.3156726	734.5867994	769.0572917	0.69926189	264.6	0.574902344	0.50612525
10/06/2018 12:30	RUFyo	ENF	26.15065695	1.4015	NaN	1399.45	62.0333	13.9767	0.619654934	70.29333333	63.90021213	715	2.598307292	1.125028975	-0.066070402	934.3788721	798.6440021	1196.155416	799.0746528	NaN	256.196	0.667675781	0.309082167
13/06/2018 13:00	RUFyo	ENF	11.78678383	2.0974	NaN	1146.94	59.3833	16.1967	0.767217607	70.26	37.04494995	589.667	3.242838542	1.789311329	-0.01394165	844.78446	854.4318224	1160.037951	820.7106481	0.524479143	358.803	0.73655506	0.963609375
15/06/2018 12:30	RUFyo	ENF	13.5113677	1.0173	0.142835196	1402.87	49.6467	17.8133	1.056241629	70.10556667	95.43859796	649.7	2.902669271	1.63417829	-0.076687786	970.3236357	1144.788106	1655.106432	775.2997685	NaN	239.38	0.691670387	0.37301475
25/06/2018 12:30	RUFyo	ENF	14.7670016	1.2185	0.213833231	1071.97	59.1333	18.22	0.879967004	69.5822	74.9643156	535.7	1.863132957	0.990042	NaN	607.8615921	618.9150033	1091.462801	603.1242766	0.482749206	244.008	0.567050936	0.317094264
24/03/2019 12:30	RUFyo	ENF	4.919031758	0.2796	NaN	250.299	84.7667	3.64233	0.121534838	67.1	64.0121595	95.8067	0.518359375	0.367623242	-0.097185949	80.1432991	302.1934838	943.7935256	NaN	1.100808912	36.3878	0.320190249	0.357160333
06/04/2019 13:30	RUFyo	ENF	8.901615689	0.4239	0.287512233	NaN	41.2133	9.02333	0.685949119	76.2	NaN	231.947	0.86031808	0.259960972	-0.039249317	NaN	427.3137829	930.0143857	NaN	0.206177343	32.048	0.459470079	0.21925125
18/04/2019 13:00	RUFyo	ENF	10.43608951	-0.1369	NaN	NaN	32.95	11.2533	0.911462776	76.2	NaN	522.325	1.450671414	0.431514263	-0.072372836	NaN	766.4750126	1335.147275	285.2511574	0.248368875	80.2721	0.574075255	0.165105167
19/04/2019 13:00	RUFyo	ENF	10.64674807	0.0582	0.31017032	NaN	34.68	10.82	0.862167707	76.1967	NaN	533.471	1.450458829	0.425011115	NaN	NaN	789.2447799	1375.177312	283.2789352	0.191447722	55.7992	0.573922194	0.159676667
21/04/2019 12:00	RUFyo	ENF	14.4713612	-0.1799	NaN	NaN	54.2133	11.8733	0.649097007	76.2	NaN	495.123	1.450042517	0.412275782	-0.09839522	NaN	588.3207681	1025.623682	279.4166667	0.246925211	93.1514	0.573622449	0.138896
29/04/2019 13:00	RUFyo	ENF	14.01545514	0.6137	NaN	NaN	24.63	9.85333	0.931190123	75.2833	NaN	601.1	1.432426304	0.361065774	-0.089185326	NaN	838.7932488	1465.749725	271.0341435	NaN	152.645	0.572262259	0.20018
13/05/2019 12:00	RUFyo	ENF	14.18416786	0.0652	0.294181985	NaN	40.19	21.5633	1.591898135	75.1	NaN	NaN	2.3575	0.592366912	NaN	NaN	736.7187514	1020.552955	632.6805556	0.388574684	227.826	0.721881944	0.277688
27/05/2019 12:30	RUFyo	ENF	14.04707243	1.3159	0.210959264	NaN	48.0733	16.55	1.003697034	74.7867	NaN	311.6	2.049934896	1.387977509	-0.086276933	NaN	443.4249751	755.4626269	996.202691	0.571230541	154.118	0.586958189	0.56989925
29/05/2019 12:00	RUFyo	ENF	15.92590512	0.5947	0.186384723	1290.41	41.4433	25.7633	2.018519295	74.6033	234.3768842	671.633	2.0984375	1.473642496	NaN	754.2177615	516.2146422	883.2045206	1032.131944	0.351774729	183.04	0.584479167	0.325876
01/06/2019 12:30	RUFyo	ENF	22.73250998	1.4922	0.19438178	1205.47	54.9767	17.01	0.896654415	74.6	85.90576694	649.6	2.697884115	1.206578357	NaN	817.9903993	1088.53495	1604.170694	1063.57798	NaN	237.696	0.678565538	0.274519083
05/06/2019 11:30	RUFyo	ENF	15.54940411	0.9327	NaN	1313.15	54.4033	23.8167	1.395673071	72.5833	125.8057534	682.267	3.483365885	0.856632244	-0.042044673	1052.950809	1310.694081	1634.585317	1104.783131	NaN	249.758	0.801851128	0.303661167
08/06/2019 12:00	RUFyo	ENF	13.99476186	1.1311	NaN	849.439	43.7367	27.1367	2.10685375	63.6033	157.2380937	414.367	3.4796875	0.68579846	NaN	684.0638447	1282.257021	1592.247756	1111	0.612320415	239.612	0.8053125	0.3152
10/06/2019 11:30	RUFyo	ENF	18.98844722	0.4381	0.141054894	1020.8	56.8767	22.1933	1.19380244	61.0967	171.5251436	501.767	3.47453342	0.574310707	NaN	823.9570625	1429.10271	1770.514645	1114.958333	0.381609772	159.635	0.807167969	0.28222725
11/06/2019 13:00	RUFyo	ENF	10.71633098	1.2752	NaN	1329.54	34.97	23.85	1.994588542	59.5	172.0986533	658.333	3.471766493	0.514459386	-0.089393824	1074.486448	1328.472109	1643.814877	1117.083333	0.390601508	249.144	0.808164063	0.3066465
13/06/2019 12:30	RUFyo	ENF	21.82312152	2.0295	NaN	1319.7	49.07	18.4567	1.113438556	64.4467	76.30006987	676.9	3.461545139	0.403092727	NaN	1068.166555	1301.870985	1608.437496	1120.583767	NaN	295.59	0.809401042	0.298322667
25/06/2019 13:30	RUFyo	ENF	17.24081749	1.1045	NaN	1111.98	37.62	21.8	1.685052388	56.6633	204.6617902	571.6	1.783528646	0.379568294	NaN	667.1321528	1002.920099	1671.673426	789.8927951	0.372447835	177.62	0.599949777	0.38577575
22/07/2019 13:30	RUFyo	ENF	14.98970289	0.9316	NaN	1467.28	48.25	23.9333	1.595414227	72.3667	66.05417321	599.267	NaN	NaN	-0.035894648	NaN	NaN	1323.490902	NaN	0.533578165	412.481	NaN	0.43217075
26/07/2019 12:00	RUFyo	ENF	21.22693987	1.0695	NaN	1532.25	64.3567	24.52	1.139099902	73.7133	150.1185904	636.1	2.471279762	0.650327645	-0.034826652	1105.158114	578.1458158	801.5721146	775.8541667	0.387516681	191.658	0.721264881	0.260436
07/04/2018 12:30	SENor	ENF	10.70334555	0.3419	NaN	NaN	44.88355	7.789124	0.590290048	25.69	292.5285383	NaN	0.353033854	0.306089319	NaN	NaN	69.91626787	303.969433	NaN	0.196558372	39.3045	0.230010851	0.716372583
12/04/2018 12:30	SENor	ENF	9.806106425	0.2062	NaN	NaN	31.63696	9.832467	0.843410882	25.9175	271.7612437	NaN	0.452589286	0.30205509	NaN	NaN	286.750014	1082.967456	257.9036458	0.181652716	65.4902	0.264781746	0.369944833
13/04/2018 12:00	SENor	ENF	11.88228599	-0.0758	0.262488475	NaN	18.82617	12.23593	1.179252671	26.1275	263.0717103	NaN	0.507142857	0.319202057	NaN	NaN	347.3208614	1205.576544	265.125	0.212166232	89.399	0.288095238	0.355508
20/04/2018 11:30	SENor	ENF	15.45825589	-0.6325	NaN	NaN	48.17208	20.14652	1.261803291	24.1725	215.4287005	NaN	0.864115203	0.421666823	NaN	NaN	379.1168374	884.3251245	310.90625	0.299539638	118.225	0.428707527	0.288006667
25/04/2018 11:30	SENor	ENF	15.05426091	0.2698	NaN	NaN	54.04479	11.80577	0.648520651	22.1225	129.773424	NaN	1.06218068	0.459323532	NaN	NaN	532.5642601	1102.191486	333.40625	0.306466431	103.076	0.483186694	0.28540875
27/04/2018 12:30	SENor	ENF	21.02879093	0.4586	0.378381413	NaN	60.48786	10.36956	0.505740782	22.5275	86.00379033	NaN	1.182753596	0.464139867	NaN	NaN	151.0197374	294.4726167	351.5827546	0.288987584	137.815	0.512848152	0.588808917
06/05/2018 13:30	SENor	ENF	14.08033358	0.3179	NaN	NaN	48.31644	19.88985	1.23800141	22.555	165.6410104	NaN	1.836280293	0.470679957	NaN	NaN	483.5847218	737.735206	481.1397569	0.303786028	157.308	0.655499043	0.3572875
09/05/2018 12:30	SENor	ENF	12.39950024	0.4702	0.410992317	NaN	32.94598	22.28378	1.866772336	19.9525	257.0183528	NaN	1.987844565	0.508223287	NaN	NaN	1052.004465	1550.907443	533.7734375	0.286863266	149.337	0.678315441	0.174176417
18/05/2018 13:00	SENor	ENF	18.23530838	1.3207	0.333780749	NaN	33.39401	14.62371	1.134678966	13.52475	NaN	NaN	2.323370181	0.555079934	NaN	NaN	1210.328748	1656.67716	606.3292824	NaN	118.673	0.730576105	0.190013333
21/05/2018 12:00	SENor	ENF	14.95959948	1.1161	0.281072894	NaN	25.42364	23.33726	2.216270656	11.762	318.8085971	NaN	2.435625	0.573787711	NaN	NaN	1013.782432	1361.015584	627.2916667	0.304877373	137.5	0.744872024	0.239804
28/05/2018 13:00	SENor	ENF	17.0917827	1.2072	0.255628199	NaN	25.45726	23.07068	2.179081547	8.48	284.0008675	NaN	2.805348462	0.683924657	NaN	NaN	960.0404596	1233.343115	729.8506944	0.319429142	153.946	0.77840501	0.257841
06/06/2018 13:30	SENor	ENF	25.9856298	1.66835	0.259028418	NaN	34.29004	12.70044	0.984875679	6.406	153.8363907	NaN	2.57855203	0.625073942	NaN	NaN	1201.042034	1596.442804	757.7838542	0.282206037	132.98	0.752323873	0.255289
10/06/2018 12:30	SENor	ENF	13.34677159	1.4015	0.266278259	NaN	32.92133	27.07189	2.502104434	5.85225	330.9567014	NaN	2.502195915	0.609187207	NaN	NaN	831.4720183	1150.426954	730.9001736	0.360301488	145.943	0.722750815	0.457720021
13/06/2018 13:00	SENor	ENF	22.30461645	2.0974	0.262359875	NaN	62.60408	15.5098	0.675335644	7.14325	94.28163166	NaN	2.447782561	0.597492398	NaN	NaN	805.1851855	1148.832842	710.3912037	0.477520909	134.117	0.70087236	0.625019167
15/06/2018 12:30	SENor	ENF	16.45486365	1.0173	NaN	NaN	33.41437	20.35485	1.642584491	6.38625	255.5554976	NaN	2.592879376	0.609939766	NaN	NaN	1073.143615	1492.793959	697.306713	0.277829723	127.473	0.718882609	0.30777075
25/06/2018 12:30	SENor	ENF	17.65409552	1.3837	0.308011038	NaN	49.88502	19.80381	1.193896778	7.13025	152.0594316	NaN	2.895435888	0.598697515	NaN	NaN	1292.03769	1675.311704	773.9910301	0.355948179	163.891	0.771222267	0.234995833
27/06/2018 12:00	SENor	ENF	17.97096857	0.4019	0.270239273	NaN	40.24802	20.268	1.465940416	6.36175	NaN	NaN	2.828596939	0.574653947	NaN	NaN	1242.73136	1613.510966	831.1944444	NaN	166.45	0.770203231	0.274928
04/07/2018 13:00	SENor	ENF	14.25732846	1.2128	0.24543647	NaN	42.08906	20.66226	1.456566576	5.436	366.0709287	NaN	2.678205605	0.735001537	NaN	NaN	1336.7026	1747.176911	887.3894676	0.236831326	87.4242	0.765064254	0.2437315
